# Supplementary material for: Haemoglobin A1c and hearing impairment: longitudinal analysis using a large occupational health check-up data of Japan
Source: PubMed Central journal article supplement — BMJ Open. 2018 Sep 17;8(9):e023220. doi: 10.1136/bmjopen-2018-023220 (PMC6144394; doi:10.1136/bmjopen-2018-023220), 2018-09-17
Supplement: bmjopen-2018-023220.draft_revisions.pdf [file bmjopen-2018-023220.draft_revisions.pdf]

# BMJ Open

BMJ Open is committed to open peer review. As part of this commitment we make the peer review history of every article we publish publicly available.

When an article is published we post the peer reviewers' comments and the authors' responses online. We also post the versions of the paper that were used during peer review. These are the versions that the peer review comments apply to.

The versions of the paper that follow are the versions that were submitted during the peer review process. They are not the versions of record or the final published versions. They should not be cited or distributed as the published version of this manuscript.

BMJ Open is an open access journal and the full, final, typeset and author-corrected version of record of the manuscript is available on our site with no access controls, subscription charges or pay-per-view fees (<http://bmjopen.bmj.com>).

If you have any questions on BMJ Open's open peer review process please email [editorial.bmjopen@bmj.com](mailto:editorial.bmjopen@bmj.com)

# BMJ Open

## Hemoglobin A1c and Hearing Impairment: longitudinal analysis using a large occupational health check-up data of Japan

|                               |                                                                                                                                                                                                                                                                                                                                                                                                                                                                                                                                                                                                                                                                                                                                                                                                                                                                                                                                                                                                                                                                                                                                                                                                                                                                                                                                                                                                                                                                                                                                                                                                                                                                                                                                                                                                  |
|-------------------------------|--------------------------------------------------------------------------------------------------------------------------------------------------------------------------------------------------------------------------------------------------------------------------------------------------------------------------------------------------------------------------------------------------------------------------------------------------------------------------------------------------------------------------------------------------------------------------------------------------------------------------------------------------------------------------------------------------------------------------------------------------------------------------------------------------------------------------------------------------------------------------------------------------------------------------------------------------------------------------------------------------------------------------------------------------------------------------------------------------------------------------------------------------------------------------------------------------------------------------------------------------------------------------------------------------------------------------------------------------------------------------------------------------------------------------------------------------------------------------------------------------------------------------------------------------------------------------------------------------------------------------------------------------------------------------------------------------------------------------------------------------------------------------------------------------|
| Journal:                      | <i>BMJ Open</i>                                                                                                                                                                                                                                                                                                                                                                                                                                                                                                                                                                                                                                                                                                                                                                                                                                                                                                                                                                                                                                                                                                                                                                                                                                                                                                                                                                                                                                                                                                                                                                                                                                                                                                                                                                                  |
| Manuscript ID                 | bmjopen-2018-023220                                                                                                                                                                                                                                                                                                                                                                                                                                                                                                                                                                                                                                                                                                                                                                                                                                                                                                                                                                                                                                                                                                                                                                                                                                                                                                                                                                                                                                                                                                                                                                                                                                                                                                                                                                              |
| Article Type:                 | Research                                                                                                                                                                                                                                                                                                                                                                                                                                                                                                                                                                                                                                                                                                                                                                                                                                                                                                                                                                                                                                                                                                                                                                                                                                                                                                                                                                                                                                                                                                                                                                                                                                                                                                                                                                                         |
| Date Submitted by the Author: | 29-Mar-2018                                                                                                                                                                                                                                                                                                                                                                                                                                                                                                                                                                                                                                                                                                                                                                                                                                                                                                                                                                                                                                                                                                                                                                                                                                                                                                                                                                                                                                                                                                                                                                                                                                                                                                                                                                                      |
| Complete List of Authors:     | <p>Nagahama, Satsue; Toho University Graduate School of Medicine, Department of Environmental and Occupational Health; All Japan Labor Welfare Foundation, Division of Occupational Health and Promotion</p> <p>Kashino, Ikuko; National Center for Global Health and Medicine, Department of Epidemiology and Prevention, Center for Clinical Sciences</p> <p>Hu, Huanhuan; National Center for Global Health and Medicine, Department of Epidemiology and Prevention, Center for Clinical Sciences</p> <p>Nanri, Akiko; Fukuoka Women's University, Department of Food and Health Sciences International College of Arts and Sciences</p> <p>Kurotani, Kayo; National Institutes of Biomedical Innovation, Health and Nutrition, National Institute of Health and Nutrition, Department of Nutritional Epidemiology and Shokuiku</p> <p>Kuwahara, Keisuke; Teikyo University, Graduate School of Public Health; National Center for Global Health and Medicine, Department of Epidemiology and Prevention, Center for Clinical Sciences</p> <p>Dan, Masashi; All Japan Labor Welfare Foundation,</p> <p>Michikawa, Takehiro; National Institute for Environmental Studies, Environmental Epidemiology Section, Center for Environmental Health Sciences</p> <p>Akter, Shamima; National Center for Global Health and Medicine, Department of Epidemiology and Prevention, Center for Clinical Sciences</p> <p>Mizoue, Tetsuya; National Center for Global Health and Medicine, Department of Epidemiology and Prevention, Center for Clinical Sciences</p> <p>Murakami, Yoshitaka ; Toho University Graduate School of Medicine, Department of Medical statistics</p> <p>Nishiwaki, Yuji; Toho University Graduate School of Medicine, Department of Environmental and Occupational Health</p> |
| Keywords:                     | EPIDEMIOLOGY, Diabetes & endocrinology < INTERNAL MEDICINE, OCCUPATIONAL & INDUSTRIAL MEDICINE, Audiology < OTOLARYNGOLOGY                                                                                                                                                                                                                                                                                                                                                                                                                                                                                                                                                                                                                                                                                                                                                                                                                                                                                                                                                                                                                                                                                                                                                                                                                                                                                                                                                                                                                                                                                                                                                                                                                                                                       |
|                               |                                                                                                                                                                                                                                                                                                                                                                                                                                                                                                                                                                                                                                                                                                                                                                                                                                                                                                                                                                                                                                                                                                                                                                                                                                                                                                                                                                                                                                                                                                                                                                                                                                                                                                                                                                                                  |

SCHOLARONE™  
Manuscripts

1 **Hemoglobin A1c and Hearing Impairment: longitudinal analysis using a large**

2 **occupational health check-up data of Japan**

3  
4 Satsue Nagahama 1 2 3\*, Ikuko Kashino 3, Huanhuan Hu 3, Akiko Nanri 4, Kayo

5 Kurotani 5, Keisuke Kuwahara 6 3, Masashi Dan 2, Takehiro Michikawa 7, Shamima

6 Akter 3, Tetsuya Mizoue 3, Yoshitaka Murakami 8, Yuji Nishiwaki 1

7  
8 1 Toho University Graduate School of Medicine, Department of Environmental and

9 Occupational Health, 5-21-16, Omorinishi, Otaku, Tokyo, 143-8540, Japan. Phone

10 +81-3-3762-4151(2403), Fax +81-3-5493-5416

11 E-mail: [satsue-n@umin.ac.jp](mailto:satsue-n@umin.ac.jp)

12 ;

13 2 All Japan Labor Welfare Foundation, Division of Occupational Health and Promotion,

14 6-16-11, Hatanodai, Shinagawa, Tokyo, 142-0064, Japan;

15 3 National Center for Global Health and Medicine, Department of Epidemiology and

16 Prevention, Center for Clinical Sciences, 1-21-1, Toyama, Shinjuku, Tokyo, Japan;

17 4 Fukuoka Women's University, Department of Food and Health Sciences International

18 College of Arts and Sciences, 1-1-1, Kasumigaoka, Higashiku, Fukuoka, Japan;

- 1  
2  
3  
4  
5  
6 19 5 National Institutes of Biomedical Innovation, Health and Nutrition, National Institute  
7  
8  
9 20 of Health and Nutrition, Department of Nutritional Epidemiology and Shokuiku, 1-23-1,  
10  
11 21 Toyama, Shinjuku, Tokyo, Japan;  
12  
13  
14 22 6 Teikyo University, Graduate School of Public Health, 2-11-1, Kaga, Itabashi, Tokyo,  
15  
16  
17 23 Japan;  
18  
19  
20 24 7 Centre for Health and Environmental Risk Research, National Institute for  
21  
22  
23 25 Environmental Studies, Environmental Epidemiology Section, 16-2, Onogawa,  
24  
25  
26 26 Tsukubashi, Ibaraki, Japan;  
27  
28  
29 27 8 Toho University Graduate School of Medicine, Department of Medical statistics,  
30  
31 28 5-21-16, Omorinishi, Otaku, Tokyo, Japan;  
32  
33  
34 29 \*Correspondence to S. Nagahama.  
35  
36

37 30

38  
39 31 Word count 3,091

40  
41  
42 32 Tables 2

43  
44  
45 33 Figures 2  
46  
47  
48  
49  
50  
51  
52  
53  
54  
55  
56  
57  
58  
59  
60

1  
2  
3  
4  
5  
6 34 **Objectives** The aim of this study was to determine whether hemoglobin A1c (HbA1c)  
7  
8  
9 35 level is associated with the incidence of hearing impairment accounting for smoking  
10  
11  
12 36 status and diabetic condition at baseline.

13  
14 37 **Methods** Participants were 131,689 men and 71,286 women aged 30-65 years and free  
15  
16  
17 38 of hearing impairment at baseline (2008) who attended annual health check-ups from  
18  
19  
20 39 2008 to 2015. We defined low frequency hearing impairment at a hearing threshold >30  
21  
22  
23 40 dB at 1 kHz and high frequency at >40 dB at 4 kHz in the better ear in pure-tone  
24  
25  
26 41 audiometric tests. HbA1c was categorized into 7 categories. The association between  
27  
28  
29 42 HbA1c and hearing impairment was assessed using the Cox proportional hazards  
30  
31  
32 43 model.

33  
34 44 **Results** On 5 years' mean follow-up, high HbA1c was associated with high frequency  
35  
36  
37 45 hearing impairment. In non-smokers, HbA1c  $\geq 8.0\%$  was associated with high frequency  
38  
39  
40 46 hearing impairment, with a multivariable hazard ratio (95% confidence interval)  
41  
42  
43 47 compared with HbA1c 5.0-5.4% of 1.46 (1.10-1.94) in men and 2.15 (1.13-4.10) in  
44  
45  
46 48 women. There was no significant association between HbA1c and hearing impairment  
47  
48  
49 49 in smokers. A J-shaped association between HbA1c and high frequency hearing  
50  
51  
52 50 impairment was observed for participants with diabetes at baseline. HbA1c was not  
53  
54  
55 51 associated with low frequency hearing impairment among any participants.  
56  
57  
58  
59  
60

1  
2  
3  
4  
5  
6 52 **Conclusions** HbA1c  $\geq$ 8.0% of non-smokers and  $\geq$ 7.3% of participants with diabetes  
7  
8  
9 53 was associated with high frequency hearing impairment. These findings indicate that  
10  
11 54 appropriate glycemic control may prevent diabetic-related hearing impairment.  
12  
13

14 55

16  
17 56 Strengths and limitations of this study

18  
19  
20 57 ▪ This study included a large number of participants, accounting for gender and smoking  
21  
22 58 status.

23  
24  
25 59 ▪ To determine whether HbA1c was associated with hearing impairment among  
26  
27 60 participants with diabetes at baseline.

28  
29  
30 61 ▪ Information on ototoxic drug use, ear surgery, and ear infection was was not obtained.  
31  
32  
33

34 62

35  
36  
37 63  
38  
39  
40  
41  
42  
43  
44  
45  
46  
47  
48  
49  
50  
51  
52  
53  
54  
55  
56  
57  
58  
59  
60

1  
2  
3  
4  
5  
6 64 BACKGROUND

7  
8 65 Patients with hearing impairment experience a range of complications, including  
9  
10  
11 66 impaired quality of life, dementia, depression, loneliness, poor self-esteem and  
12  
13  
14 67 functional disability (1-4). These complications have made this condition a social and  
15  
16  
17 68 economic problem worldwide. More than 5% of the world population has hearing  
18  
19  
20 69 impairment, and this is expected to increase with the aging of the population (5).  
21  
22  
23 70 Although this bleak picture points to the importance of identifying preventable risk  
24  
25  
26 71 factors for hearing impairment, such studies are in fact scarce.  
27  
28  
29 72 Emerging evidence suggests that diabetes mellitus may be a risk factor for hearing  
30  
31  
32 73 impairment. Meta-analyses of 13 cross-sectional studies showed that subjects with  
33  
34  
35 74 diabetes had a 2-fold-increased risk of developing hearing impairment (odds ratio 2.15,  
36  
37  
38 75 95%CI 1.72-2.68) (6). Diabetic hearing impairment is hypothesized to be due to  
39  
40  
41 76 microvascular complications (7, 8). Diabetic hearing impairment may thus be prevented  
42  
43  
44 77 by appropriate glycemetic control, which has been shown to be effective for other  
45  
46  
47 78 microvascular complications of diabetes, such as retinopathy, nephropathy and  
48  
49  
50 79 neuropathy (9-12). Three studies have reported the association between hearing  
51  
52  
53 80 impairment and hemoglobin A1c (HbA1c), an indicator for glycemetic control (13-15).  
54  
55  
56 81 One of these reported a positive dose-relationship between HbA1c and hearing  
57  
58  
59  
60

1  
2  
3  
4  
5  
6 82 impairment as defined using a pure-tone average threshold of mainly low frequencies  
7  
8  
9 83 (15), while the other two reported that HbA1c was positively associated with high  
10  
11 84 frequency hearing impairment (13, 14). Nevertheless, no study has yet reported the  
12  
13  
14 85 precise shape of the dose-relationship between HbA1c and high frequency hearing  
15  
16  
17 86 impairment. Furthermore, no study has yet investigated whether HbA1c is associated  
18  
19  
20 87 with hearing impairment among those with diabetes.  
21  
22  
23 88 In Japan, a pure-tone audiometric test is mandatory in annual occupational health  
24  
25  
26 89 check-ups (16). The large sample size this affords has enabled us to investigate the  
27  
28  
29 90 dose-response relationship between HbA1c and hearing impairment, while accounting  
30  
31  
32 91 for well-known risk factors of hearing impairment such as gender and smoking (17, 18).  
33  
34  
35 92 The present study had two aims. The first aim was to investigate the association  
36  
37  
38 93 between HbA1c and the incidence of hearing impairment using a large dataset from  
39  
40  
41 94 annual occupational health check-ups in Japan, accounting for gender and smoking  
42  
43  
44 95 status. The second aim was to determine whether HbA1c was associated with hearing  
45  
46  
47 96 impairment among participants with diabetes.

48 97

## 49 98 METHODS

### 50 99 Study population



1  
2  
3  
4  
5  
6 100 The present study was conducted using data from annual health check-ups of Japanese  
7  
8  
9 101 workers. The All Japan Labor Welfare Foundation, a health service provider with  
10  
11 102 centers in Tokyo, Aomori, Nagano, Yamagata, Ibaraki, Gunma and Nagoya provided the  
12  
13  
14 103 data from April 2008 through Dec 2015, allowing a maximum of 7 years of follow-up.  
15  
16  
17 104 In Japan, annual health check-ups are mandatory for all employees and include a  
18  
19  
20 105 hearing test under the Industrial Safety and Health Act. Nearly all employees attend a  
21  
22  
23 106 health check-up every year. Participants were mainly Japanese employees but also  
24  
25  
26 107 included a small number of their dependents, employers and foreign workers.  
27  
28  
29 108 A total of 312,512 participants aged 30-65 years underwent a hearing test and HbA1c  
30  
31 109 test at baseline (between Apr 2008 and Mar 2009). Of these, we excluded participants  
32  
33  
34 110 with hearing impairment at baseline (n=51,489). Given that diabetic patients with  
35  
36  
37 111 complications may receive more intensive treatments, which may bias the association  
38  
39  
40 112 between HbA1c and hearing impairment, we excluded participants with cardiovascular  
41  
42  
43 113 disease and stroke (n=913). We further excluded participants who did not attend any  
44  
45  
46 114 subsequent health examinations or hearing tests (n=48,618). After further exclusion of  
47  
48  
49 115 8,517 participants with missing information on covariates (5,011 for smoking status,  
50  
51 116 5,152 for alcohol consumption, 1,815 for physical activity data, 5 for body mass index  
52  
53  
54 117 (BMI), 9 for hypertension and 9 for dyslipidemia data; some participants had missing  
55  
56  
57  
58  
59  
60

1  
2  
3  
4  
5  
6 118 data for more than one parameter), leaving 202,975 participants (131,689 men and

7  
8  
9 119 71,286 women) for analysis.

10  
11  
12 120 Ethics

13  
14 121 We obtained written informed consent from each participant who attended the health

15  
16  
17 122 check-up after April 2013. Before March 2013, we disclosed the purpose of our study

18  
19  
20 123 by posters and the participants had the opportunity to refuse the use of their data for the

21  
22  
23 124 study. This procedure conforms to the Japanese Ethical Guidelines for Medical and

24  
25  
26 125 Health Research Involving Human Subjects, where the obtaining consent may be

27  
28  
29 126 simplified for observational studies using existing data. The research protocol including

30  
31  
32 127 consent procedure was approved by the Ethics Committee of the Faculty of Medicine,

33  
34  
35 128 Toho University (No. 25017 and No.A16130) and the Ethics Committee of the National

36  
37  
38 129 Center for Global Health and Medicine (No. NCGM-G-001254-02).

39  
40 130 Ascertainment of hearing impairment

41  
42  
43 131 Trained staff performed pure-tone air-conduction audiometry using an audiometer

44  
45  
46 132 (AA-57, RION Inc., Tokyo, Japan). Low frequency hearing impairment was defined as

47  
48  
49 133 failure to hear a pure-tone signal of 30dB at 1 kHz in the better ear, and high frequency

50  
51  
52 134 hearing impairment as failure to hear a pure-tone signal of 40dB at 4 kHz in the better

53  
54  
55 135 ear. These thresholds are recommended for use in annual health check-ups by Ministry

1  
2  
3  
4  
5  
6 136 of Health, Labor and Welfare in Japan (16). Onset of hearing impairment was defined as  
7  
8  
9 137 the day of the health check-up on which hearing impairment was first detected.  
10  
11 138 Data collection and measurements at baseline (between Apr 2008 and Mar 2009)  
12  
13  
14 139 We used a self-administered questionnaire developed by the Ministry of Health, Labor  
15  
16  
17 140 and Welfare for a specific health examination, namely the national health checkup  
18  
19  
20 141 system focused on metabolic syndrome (19), to assess medical history, regular physical  
21  
22  
23 142 activity (walking time  $<60$  min/day or  $\geq 60$  min/day), smoking status (non-smoker, daily  
24  
25  
26 143 smoker  $\leq 20$  cigarettes/day or  $>20$  cigarettes/day), alcohol consumption (non-drinker,  $<1$   
27  
28  
29 144 *go*, 1 to  $<2$  *go* or  $\geq 2$  *go*/day; one *go* of sake, a traditional Japanese beverage, is equal to  
30  
31  
32 145 about 180 mL of 10-14% ethanol and contains about 23 g of ethanol) (20), and  
33  
34  
35 146 self-reported diabetes (treatments with anti-diabetic medication or a self-reported  
36  
37  
38 147 history of diabetes: yes or no). Job type was categorized as professional job,  
39  
40  
41 148 management, office job, sales, service, telegraph, manufacturing, transportation and  
42  
43  
44 149 other. Height was measured to the nearest 0.1 cm and weight to the nearest 0.1 kg. Body  
45  
46  
47 150 mass index (BMI) was calculated as the weight in kilograms divided by the square of  
48  
49  
50 151 height in metres and categorized into 4 groups ( $<18.5$ , 18.5-22.9, 23-29.9,  $\geq 30$  kg/m<sup>2</sup>).  
51  
52  
53 152 Blood pressure was measured in the sitting position using an automated  
54  
55  
56 153 sphygmomanometer (HEM-907, Omron, Kyoto, Japan). Participants with high blood

1  
2  
3  
4  
5  
6 154 pressure ( $\geq 130$  mmHg systolic or  $\geq 85$  mmHg diastolic) received a second measurement  
7  
8  
9 155 and the average was used for the analysis. Hypertension was defined by  $\geq 140$  mmHg  
10  
11 156 systolic,  $\geq 90$  mmHg diastolic or the use of medication for hypertension. A venous blood  
12  
13  
14 157 sample was collected and stored in a cooler at 4 °C for transportation to an external  
15  
16  
17 158 laboratory (SRL, Tokyo, Japan). Triglyceride level was measured using an enzymatic  
18  
19  
20 159 colorimetric test and high-density lipoprotein cholesterol (HDL-C) was determined  
21  
22  
23 160 using a direct method. Dyslipidemia was defined by triglyceride  $\geq 150$  mg/dL (1.7  
24  
25  
26 161 mmol/L) in men and women, HDL-C  $< 40$  mg/dL (1.04 mmol/L) in men and  $< 50$  mg/dL  
27  
28  
29 162 (1.3 mmol/L) in women or use of medication for dyslipidemia. HbA1c was measured by  
30  
31  
32 163 latex agglutination turbidimetry and converted to the National Glycohemoglobin  
33  
34  
35 164 Standardization Program equivalent value (%) using the formula below, according to the  
36  
37  
38 165 Japan Diabetes Society statement (21) :  
39  
40 166  $\text{HbA1c (\%)} = 1.02 \times \text{HbA1c (Japan Diabetes Society) (\%)} + 0.25\%$   
41  
42  
43 167 Diabetes was defined as  $\text{FPG} \geq 126$  mg/dL,  $\text{HbA1c} \geq 6.5\%$ , or self-reported diabetes.  
44  
45  
46 168 Statistical analysis  
47  
48  
49 169 Participants were divided into 7 groups according to their HbA1c level at baseline  
50  
51  
52 170 [ $< 5.0\%$  (31 mmol/mol), 5.0-5.4% (31-36 mmol/mol), 5.5-5.9% (37-41 mmol/mol),  
53  
54  
55 171 6.0-6.4% (42-46 mmol/mol), 6.5-6.9% (48-52 mmol/mol), 7.0-7.9% (53-63 mmol/mol),  
56  
57  
58  
59  
60

1  
2  
3  
4  
5  
6 172  $\geq 8.0\%$  (64 mmol/mol)]. The HbA1c group specific baseline characteristics of  
7  
8  
9 173 participants were described as means (SD) for continuous variables and percentages for  
10  
11 174 categorical variables. Person-years was calculated from baseline to the onset of hearing  
12  
13  
14 175 impairment, or the date of the last health check-up through Dec 2015 (whichever  
15  
16  
17 176 occurred first). Crude incident rates of hearing impairment were shown in events per  
18  
19  
20 177 1000 person-years. Survival analyses were performed using Cox regression to estimate  
21  
22  
23 178 the hazard ratio (HR) with 95% confidence interval (CI) for the incidence of hearing  
24  
25  
26 179 impairment across HbA1c categories, with 5.0-5.4% (31-36mmol/mol) as the reference  
27  
28  
29 180 value. The analyses were stratified by sex because the interaction between hearing  
30  
31 181 impairments and sex was significant ( $p$  for interaction  $<0.001$ ). Age-adjusted model  
32  
33  
34 182 (model 1) and multiple-adjusted model (model 2), which included alcohol consumption,  
35  
36  
37 183 physical activity, BMI, hypertension, dyslipidemia, self-reported diabetes and smoking  
38  
39  
40 184 status were used for the analysis. Although smoking status itself was related to hearing  
41  
42  
43 185 impairment in this study, the association between HbA1c and hearing impairment  
44  
45  
46 186 differed according to smoking status ( $p$  for interaction  $<0.001$ ). We therefore  
47  
48  
49 187 additionally performed analyses according to combined HbA1c (7 groups) and smoking  
50  
51  
52 188 status (non-smoker and current smoker), by considering HbA1c 5.0-5.4%  
53  
54 189 (31-36mmol/mol) and non-smoker as the reference category. We did not analyze  
55  
56  
57  
58  
59  
60

1  
2  
3  
4  
5  
6 190 women's smokers because of the small number of cases. To assess whether control of  
7  
8  
9 191 HbA1c would reduce the incidence of hearing impairment in those with diabetes, we  
10  
11 192 elucidated the shape of the relationship between HbA1c and high frequency hearing  
12  
13  
14 193 impairment among those with diabetes. We fitted restricted cubic splines models with  
15  
16  
17 194 seven knots placed at the 1th, 5th, 25th, 50th, 75th, 95th, and 99th centiles as reference  
18  
19  
20 195 values of HbA1c 6.6% (25th) (22). The HRs were adjusted for alcohol consumption,  
21  
22  
23 196 physical activity, BMI, hypertension, dyslipidemia and smoking status. As a sensitivity  
24  
25  
26 197 analysis, we further adjusted for job type in the main analyses (model 2) among  
27  
28  
29 198 participants with this information (n=126,823). We tested the proportional hazards  
30  
31  
32 199 assumption using Schoenfeld residuals. We found no significant deviations for any  
33  
34  
35 200 covariate. P value of two-tailed test <0.05 was considered statistically significant. Trend  
36  
37  
38 201 association was assessed by assigning ordinal numbers (0–6) to the HbA1c categories.  
39  
40  
41 202 We calculated the p for the quadratic trend because it was a better fit for the data than  
42  
43  
44 203 the simple linear model. All statistical analyses were performed using Stata version 12.1  
45  
46  
47 204 (StataCorp, College Station, Texas, USA).

48 205

49  
50  
51 206 RESULTS

1  
2  
3  
4  
5  
6 207 Baseline characteristics by category of HbA1c are shown in Table 1. The mean age of  
7  
8  
9 208 participants was 45 years for men and 47 years for women. Participants who had higher  
10  
11 209 HbA1c tended to be non-drinkers and to have higher BMI, hypertension, and  
12  
13  
14 210 dyslipidemia in both men and women. Male participants with higher HbA1c tended to  
15  
16  
17 211 be smokers consuming > 20 cigarettes per day.  
18  
19  
20 212 In men, 4,621 developed high frequency hearing impairment with 661,937 person-years  
21  
22  
23 213 (mean duration of follow-up was 5.0 years) and 1,311 developed low frequency hearing  
24  
25  
26 214 impairment with 670,153 person-years (5.1 years). In women, 582 developed high  
27  
28  
29 215 frequency hearing impairment with 345,312 person-years (4.8 years) and 1,207  
30  
31  
32 216 developed low frequency hearing impairment with 344,057 person-years (4.8 years).  
33  
34 217 Table 2 shows the association between HbA1c and the incidence of hearing impairment.  
35  
36  
37 218 In the multivariable-adjusted model, HbA1c showed a quadratic trend with the  
38  
39  
40 219 incidence of high frequency hearing impairment in men (p for quadratic=0.007), and a  
41  
42  
43 220 statistically marginal association in women (p for quadratic=0.08). HbA1c was not  
44  
45  
46 221 associated with low frequency hearing impairment. Figure 1 shows the association  
47  
48  
49 222 between HbA1c and high frequency hearing impairment with accounting for smoking  
50  
51  
52 223 status [the interaction between HbA1c and smoking status (p for interaction <0.001)].  
53  
54 224 Compared to non-smokers with HbA1c 5.0-5.4% (31-36mmol/mol), non-smokers with  
55  
56  
57  
58  
59  
60

1  
2  
3  
4  
5  
6 225 HbA1c  $\geq$ 8.0% (64 mmol/mol) showed an association with hearing impairment [HR  
7  
8 226 (95%CI) of 1.46 (1.11-1.92) in men and 2.36 (1.34-4.15) in women]. Although smokers  
9  
10  
11 227 had higher HRs of hearing impairment than non-smokers, HbA1c level was not  
12  
13  
14 228 associated with hearing impairment among smokers. Additional adjustments for job  
15  
16  
17 229 type did not affect the results (Appendix 1).

18  
19  
20 230 Figure 2 shows the spline regression model of high frequency hearing impairment at  
21  
22  
23 231 various HbA1c levels against a reference HbA1c level of 6.6% in participants with  
24  
25  
26 232 diabetes at baseline (n=10,154). The relationship between HbA1c and the incidence of  
27  
28  
29 233 hearing impairment was J-shaped, with the significant increase of HR for HbA1c $\geq$ 7.2%.

30  
31 234

## 32 33 34 235 DISCUSSION

35  
36  
37 236 In this study, we found a quadratic trend between HbA1c and the incidence of high  
38  
39  
40 237 frequency hearing impairment. In particular, HbA1c concentrations over 8.0% (64  
41  
42  
43 238 mmol/mol) were associated with high frequency hearing impairment among  
44  
45  
46 239 non-smokers. A J-shaped association between HbA1c and high frequency hearing  
47  
48  
49 240 impairment was observed among participants with diabetes at baseline. Our findings  
50  
51  
52 241 indicate that appropriate glycemic control may prevent the incidence of diabetic hearing  
53  
54  
55 242 impairment.



1  
2  
3  
4  
5  
6 243 Our finding of a quadratic trend between HbA1c and hearing impairment is supported  
7  
8  
9 244 by the results of two longitudinal studies. (13, 15) One of these reported an odds ratio  
10  
11 245 (95% CI) of high frequency hearing impairment per 1.0% increase in HbA1c of 1.52  
12  
13  
14 246 (1.03 to 2.23), albeit no statistical association between the three categories of HbA1c  
15  
16  
17 247 and high frequency hearing impairment (13). The second reported that HbA1c was  
18  
19  
20 248 positively associated with average hearing threshold, mainly among low frequencies  
21  
22  
23 249 (15). The present study provides novel evidence that an HbA1c of 8.0% (64 mmol/mol)  
24  
25  
26 250 or above is associated with increased risk of high frequency hearing impairment in  
27  
28  
29 251 non-smokers. Our findings are consistent with the work of Cruickshanks et al., who  
30  
31  
32 252 reported that poor glycemic control, defined by a glycosylated hemoglobin level, was  
33  
34  
35 253 associated with hearing impairment (23).  
36  
37 254 Additionally, we found that the J-shaped association between HbA1c and hearing  
38  
39  
40 255 impairment remained even among participants with diabetes at baseline. This result  
41  
42  
43 256 suggests that proper glycemic control may prevent diabetic-related hearing impairment  
44  
45  
46 257 even in those with diabetes. Previous studies have also reported a J-shaped association  
47  
48  
49 258 between HbA1c and diabetics complications, and noted that hypoglycemia might  
50  
51  
52 259 increase diabetic complications (24-26). More research is needed to determine a suitable  
53  
54  
55  
56  
57  
58  
59  
60

1  
2  
3  
4  
5  
6 260 HbA1c level for glycemic targeting to prevent hearing impairment in diabetic  
7  
8  
9 261 management.  
10  
11 262 We found that high frequency hearing impairment has a quadratic trend with HbA1c  
12  
13  
14 263 among non-smokers but not smokers. Previous studies have reported an adverse effect  
15  
16  
17 264 of smoking cigarettes on hearing impairment (23, 27, 28). It is plausible that the effect  
18  
19  
20 265 of smoking cigarettes may be stronger than HbA1c and might mask the effect of HbA1c.  
21  
22  
23 266 Further research is needed to confirm the joint effect of smoking and HbA1c on hearing  
24  
25  
26 267 impairment.  
27  
28 268 The pathophysiology underlying high-HbA1c-associated hearing impairment is unclear,  
29  
30  
31 269 which allows for speculation. One possible explanation is that hyperglycemia-related  
32  
33  
34 270 microvascular complications lead to thickening of the cochlea and vestibulopathy, and  
35  
36  
37 271 result in hearing impairment (7, 8, 29-33). Diabetic-related hearing impairment has been  
38  
39  
40 272 mainly observed at high frequencies, suggesting that high frequency-specific areas of  
41  
42  
43 273 the cochlea may be more fragile to ischemic changes due to microvascular  
44  
45  
46 274 complications (34-38). This mechanism is supported by the J-shaped association  
47  
48  
49 275 between HbA1c and hearing impairment observed in the present study, since previous  
50  
51  
52 276 studies also reported a J-shaped-association between HbA1c and diabetic vascular  
53  
54  
55 277 complications (39, 40). Further studies to confirm this idea are required.  
56  
57  
58  
59  
60

1  
2  
3  
4  
5  
6 278 This study has several strengths. The large dataset allowed us to investigate the  
7  
8 279 association between HbA1c and hearing impairment with comprehensive adjustment for  
9  
10  
11 280 covariates, and additionally, among participants with diabetes at baseline. Audiometry  
12  
13  
14 281 to confirm hearing impairment was conducted by trained staff. Several limitations of the  
15  
16  
17 282 study also need to be considered. First, information on noise exposure was not available  
18  
19  
20 283 and thus noise information was not considered in the analyses. However, a previous  
21  
22  
23 284 study reported that the relationship between diabetes and hearing impairment was  
24  
25  
26 285 independent of this variable (37). Moreover, in the present study, HbA1c level was  
27  
28  
29 286 associated with hearing impairment even after accounting for job type in a sensitivity  
30  
31  
32 287 analysis. Second, information on ototoxic drug use, ear surgery, and ear infection was  
33  
34  
35 288 not collected, and we were therefore unable to exclude cases of hearing impairment due  
36  
37  
38 289 to these factors. Third, blood pressure was measured once, followed by a second  
39  
40  
41 290 measurement if the first systolic blood pressure  $\geq 130$  mmHg systolic or diastolic blood  
42  
43  
44 291 pressure  $\geq 85$  mmHg. All participants didn't have the same evaluation of blood pressure.  
45  
46  
47 292 This may lead to misclassification of hypertension. Fourth, we did not account for  
48  
49  
50 293 gender or smoking status in the association between HbA1c and hearing impairment for  
51  
52  
53 294 participants with diabetes because of the small sample size. Fifth, the hearing test was  
54  
55  
56 295 only conducted at 1 kHz and 4 kHz. Hearing impairment at other frequencies could not

1  
2  
3  
4  
5  
6 296 therefore be identified. Sixth, we cannot exclude the possibility of residual confounding  
7  
8  
9 297 and confounding by unmeasured variables. Finally, the study participants were mainly  
10  
11  
12 298 workers, and thus caution is required when generalizing our findings.

## 14 299 CONCLUSION

16  
17 300 We found the quadratic trend between HbA1c and the incidence of high frequency  
18  
19  
20 301 hearing impairment in non-smokers. The trend between HbA1c and hearing impairment  
21  
22  
23 302 remained even among those with diabetes. These findings indicate that diabetic-related  
24  
25  
26 303 hearing impairment may be prevented with appropriate glycemetic control. These  
27  
28  
29 304 findings warrant confirmation in interventional studies.

## 31 305 Abbreviations

32  
33  
34 306 HbA1c: hemoglobin A1c; BMI: body mass index; HR: hazard ratio; CI: confidence  
35  
36  
37 307 interval

## 39 308 Acknowledgements

40  
41  
42 309 The authors would like to thank Dr Nobuo Yanagisawa and Dr Takeshi Kawaguchi for  
43  
44  
45 310 coordinating the study.

## 48 311 Contributors

49  
50  
51 312 SN, TaM and IK designed study and drafted the manuscript. SN, HHH, KaK, AN and  
52  
53  
54 313 KeK performed the data analysis. MD collected and interpreted the data. All authors

1  
2  
3  
4  
5  
6 314 participated in interpretation of the findings, revised the paper critically for important  
7  
8 315 intellectual content and approved the final version to be published. YN and YM  
9  
10  
11 316 provided administrative, technical and material support. SN and YN are guarantors.  
12  
13  
14 317 Funding  
15  
16  
17 318 This research was funded by All Japan Labor Welfare Foundation Research Fellowship.  
18  
19  
20 319 Competing interests  
21  
22  
23 320 None declared. SN is occupational physicians in the participating company.  
24  
25  
26 321 Ethics approval  
27  
28 322 The research protocol was approved by the Ethics Committee of the Faculty of  
29  
30  
31 323 Medicine, Toho University and the Ethics Committee of the National Center for Global  
32  
33  
34 324 Health and Medicine.  
35  
36  
37 325 Patient and public involvement  
38  
39  
40 326 No patient were involved in setting the research question or the outcome measures,  
41  
42  
43 327 planning for the design of the study. Detail has been removed from this case  
44  
45  
46 328 description/these case descriptions to ensure anonymity. Patient consent was not  
47  
48  
49 329 required for the study.  
50  
51 330 Data sharing statement  
52  
53  
54 331 No additional data are available.  
55  
56  
57  
58  
59  
60

332

For peer review only

1  
2  
3  
4  
5  
6  
7  
8  
9  
10  
11  
12  
13  
14  
15  
16  
17  
18  
19  
20  
21  
22  
23  
24  
25  
26  
27  
28  
29  
30  
31  
32  
33  
34  
35  
36  
37  
38  
39  
40  
41  
42  
43  
44  
45  
46  
47  
48  
49  
50  
51  
52  
53  
54  
55  
56  
57  
58  
59  
60

## 333 References

- 334 1. Lin FR, Metter EJ, O'Brien RJ, Resnick SM, Zonderman AB, Ferrucci L. Hearing  
335 loss and incident dementia. *Arch Neurol*. 2011;68(2):214-20.
- 336 2. Li CM, Zhang X, Hoffman HJ, Cotch MF, Themann CL, Wilson MR. Hearing  
337 impairment associated with depression in US adults, National Health and Nutrition  
338 Examination Survey 2005-2010. *JAMA Otolaryngol Head Neck Surg*.  
339 2014;140(4):293-302.
- 340 3. Herbst KG, Humphrey C. Hearing impairment and mental state in the elderly living  
341 at home. *Br Med J*. 1980;281(6245):903-5.
- 342 4. Wilson BS, Tucci DL, Merson MH, O'Donoghue GM. Global hearing health care:  
343 new findings and perspectives. *Lancet*. 2017;390(10111):2503-15.
- 344 5. WHO [Internet]. Deafness and hearing loss.  
345 <http://www.who.int/mediacentre/factsheets/fs300/en>. Accessed 11 Jan 2018.
- 346 6. Horikawa C, Kodama S, Tanaka S, Fujihara K, Hirasawa R, Yachi Y, et al. Diabetes  
347 and risk of hearing impairment in adults: a meta-analysis. *J Clin Endocrinol Metab*.  
348 2013;98(1):51-8.

- 1  
2  
3  
4  
5  
6 349 7. Fukushima H, Cureoglu S, Schachern PA, Paparella MM, Harada T, Oktay MF.  
7  
8 350 Effects of type 2 diabetes mellitus on cochlear structure in humans. Arch Otolaryngol  
9  
10  
11 351 Head Neck Surg. 2006;132(9):934-8.  
12  
13  
14 352 8. Oron Y, Elgart K, Marom T, Roth Y. Cardiovascular risk factors as causes for hearing  
15  
16 353 impairment. Audiol Neurootol. 2014;19(4):256-60.  
17  
18  
19 354 9. Klein R, Klein BE, Moss SE. Relation of glycemc control to diabetic microvascular  
20  
21 355 complications in diabetes mellitus. Ann Intern Med. 1996;124(1 Pt 2):90-6.  
22  
23  
24 356 10. Danne T, Weber B, Dinesen B, Mortensen HB. Threshold of HbA1c for the effect of  
25  
26 357 hyperglycemia on the risk of diabetic microangiopathy. Diabetes Care. 1996;19(2):183.  
27  
28  
29 358 11. Li W, Katzmarzyk PT, Horswell R, Wang Y, Johnson J, Hu G. HbA1c and all-cause  
30  
31 359 mortality risk among patients with type 2 diabetes. Int J Cardiol. 2016;202:490-6.  
32  
33  
34 360 12. 5. Glycemic Targets. Diabetes Care. 2016;39 Suppl 1:S39-46.  
35  
36  
37 361 13. Michikawa T, Mizutari K, Saito H, Takebayashi T, Nishiwaki Y. Glycosylated  
38  
39 362 hemoglobin level is associated with hearing impairment in older Japanese: the  
40  
41  
42 363 Kurabuchi Study. J Am Geriatr Soc. 2014;62(7):1231-7.  
43  
44  
45 364 14. Kang SH, Jung DJ, Cho KH, Park JW, Lee KY, Do JY. Association Between HbA1c  
46  
47 365 Level and Hearing Impairment in a Nondiabetic Adult Population. Metabolic Syndrome  
48  
49  
50 366 and Related Disorders. 2016;14(2):129-34.  
51  
52  
53  
54  
55  
56  
57  
58  
59  
60



- 1  
2  
3  
4  
5  
6 367 15. Kim MB, Zhang Y, Chang Y, Ryu S, Choi Y, Kwon MJ, et al. Diabetes mellitus and  
7  
8 368 the incidence of hearing loss: a cohort study. *Int J Epidemiol.* 2016.  
9  
10  
11 369 16. Japan Industrial Safety and Health Association (English Page): Ordinance on  
12  
13  
14 370 Industrial Safety and Health, Article 44 Periodical Medical Examination, (iii).  
15  
16  
17 371 [http://www.japaneselawtranslation.go.jp/law/detail\\_main?re=01&ia=03&vm=02&id=1](http://www.japaneselawtranslation.go.jp/law/detail_main?re=01&ia=03&vm=02&id=1)  
18  
19  
20 372 984. Accessed 11 Jan 2018.  
21  
22  
23 373 17. Rigters SC, Metselaar M, Wieringa MH, Baatenburg de Jong RJ, Hofman A,  
24  
25 374 Goedegebure A. Contributing Determinants to Hearing Loss in Elderly Men and  
26  
27  
28 375 Women: Results from the Population-Based Rotterdam Study. *Audiol Neurootol.*  
29  
30  
31 376 2016;21 Suppl 1:10-5.  
32  
33  
34 377 18. Helzner EP, Cauley JA, Pratt SR, Wisniewski SR, Zmuda JM, Talbott EO, et al.  
35  
36  
37 378 Race and sex differences in age-related hearing loss: the Health, Aging and Body  
38  
39  
40 379 Composition Study. *J Am Geriatr Soc.* 2005;53(12):2119-27.  
41  
42  
43 380 19. Ministry of Health, Labour and Welfare (English Page): Specific Health Checkups  
44  
45 381 and Specific Health Guidance. <http://www.mhlw.go.jp/english/wp/wp-hw3/dl/2-007.pdf>.  
46  
47  
48 382 Accessed 11 Jan 2018.  
49  
50  
51 383 20. Ministry of Health, Labour and Welfare (Japanese Page): Health guidance  
52  
53  
54 384 Questionnaire.  
55  
56  
57  
58  
59  
60

- 1  
2  
3  
4  
5  
6 385 [http://www.mhlw.go.jp/seisakunitsuite/bunya/kenkou\\_iryuu/kenkou/seikatsu/dl/hoken-p](http://www.mhlw.go.jp/seisakunitsuite/bunya/kenkou_iryuu/kenkou/seikatsu/dl/hoken-p)  
7  
8  
9 386 rogram2\_02.pdf. Accessed 11 Jan 2018.
- 10  
11 387 21. Kashiwagi A, Kasuga M, Araki E, Oka Y, Hanafusa T, Ito H, et al. International  
12  
13  
14 388 clinical harmonization of glycated hemoglobin in Japan: From Japan Diabetes Society  
15  
16  
17 389 to National Glycohemoglobin Standardization Program values. *J Diabetes Investig.*  
18  
19  
20 390 2012;3(1):39-40.
- 21  
22  
23 391 22. Harrell F. *Regression Modeling Strategies: With Applications to Linear Models,*  
24  
25  
26 392 *Logistic and Ordinal Regression, and Survival Analysis:* Springer International  
27  
28  
29 393 Publishing; 2015.
- 30  
31 394 23. Cruickshanks KJ, Nondahl DM, Dalton DS, Fischer ME, Klein BE, Klein R, et al.  
32  
33  
34 395 Smoking, central adiposity, and poor glycemic control increase risk of hearing  
35  
36  
37 396 impairment. *J Am Geriatr Soc.* 2015;63(5):918-24.
- 38  
39  
40 397 24. Carson AP, Fox CS, McGuire DK, Levitan EB, Laclaustra M, Mann DM, et al. Low  
41  
42  
43 398 hemoglobin A1c and risk of all-cause mortality among US adults without diabetes. *Circ*  
44  
45  
46 399 *Cardiovasc Qual Outcomes.* 2010;3(6):661-7.
- 47  
48 400 25. Goto A, Noda M, Matsushita Y, Goto M, Kato M, Isogawa A, et al. Hemoglobin a1c  
49  
50  
51 401 levels and the risk of cardiovascular disease in people without known diabetes: a  
52  
53  
54 402 population-based cohort study in Japan. *Medicine (Baltimore).* 2015;94(17):e785.
- 55  
56  
57  
58  
59  
60

- 1  
2  
3  
4  
5  
6 403 26. Snell-Bergeon JK, Wadwa RP. Hypoglycemia, diabetes, and cardiovascular disease.  
7  
8  
9 404 Diabetes Technol Ther. 2012;14 Suppl 1:S51-8.  
10  
11 405 27. Barone JA, Peters JM, Garabrant DH, Bernstein L, Krebsbach R. Smoking as a risk  
12  
13  
14 406 factor in noise-induced hearing loss. J Occup Med. 1987;29(9):741-5.  
15  
16  
17 407 28. Nomura K, Nakao M, Morimoto T. Effect of smoking on hearing loss: quality  
18  
19  
20 408 assessment and meta-analysis. Prev Med. 2005;40(2):138-44.  
21  
22  
23 409 29. Lisowska G, Namyslowski G, Morawski K, Strojek K. Cochlear dysfunction and  
24  
25  
26 410 diabetic microangiopathy. Scand Audiol Suppl. 2001(52):199-203.  
27  
28  
29 411 30. Akinpelu OV, Ibrahim F, Waissbluth S, Daniel SJ. Histopathologic changes in the  
30  
31  
32 412 cochlea associated with diabetes mellitus--a review. Otol Neurotol. 2014;35(5):764-74.  
33  
34 413 31. Krogsboll LT, Jorgensen KJ, Gronhoj Larsen C, Gotzsche PC. General health checks  
35  
36  
37 414 in adults for reducing morbidity and mortality from disease: Cochrane systematic  
38  
39  
40 415 review and meta-analysis. BMJ (Clinical research ed.). 2012;345:e7191.  
41  
42  
43 416 32. Kazmierczak H, Doroszevska G. Metabolic disorders in vertigo, tinnitus, and  
44  
45  
46 417 hearing loss. Int Tinnitus J. 2001;7(1):54-8.  
47  
48  
49 418 33. Nash SD, Cruickshanks KJ, Klein R, Klein BE, Nieto FJ, Huang GH, et al. The  
50  
51  
52 419 prevalence of hearing impairment and associated risk factors: the Beaver Dam  
53  
54 420 Offspring Study. Arch Otolaryngol Head Neck Surg. 2011;137(5):432-9.  
55  
56  
57  
58  
59  
60

- 1  
2  
3  
4  
5  
6 421 34. Uchida Y, Sugiura S, Ando F, Nakashima T, Shimokata H. Diabetes reduces auditory  
7  
8 422 sensitivity in middle-aged listeners more than in elderly listeners: a population- based  
9  
10  
11 423 study of age-related hearing loss. *Med Sci Monit.* 2010;16(7):Ph63-8.  
12  
13  
14 424 35. Konrad-Martin D, Reavis KM, Austin D, Reed N, Gordon J, McDermott D, et al.  
15  
16  
17 425 Hearing Impairment in Relation to Severity of Diabetes in a Veteran Cohort. *Ear Hear.*  
18  
19  
20 426 2015;36(4):381-94.  
21  
22  
23 427 36. Bainbridge KE, Hoffman HJ, Cowie CC. Risk factors for hearing impairment  
24  
25  
26 428 among U.S. adults with diabetes: National Health and Nutrition Examination Survey  
27  
28  
29 429 1999-2004. *Diabetes Care.* 2011;34(7):1540-5.  
30  
31 430 37. Bainbridge KE, Hoffman HJ, Cowie CC. Diabetes and hearing impairment in the  
32  
33  
34 431 United States: audiometric evidence from the National Health and Nutrition  
35  
36  
37 432 Examination Survey, 1999 to 2004. *Ann Intern Med.* 2008;149(1):1-10.  
38  
39  
40 433 38. Kim JS, Lee H. Inner ear dysfunction due to vertebrobasilar ischemic stroke. *Semin*  
41  
42  
43 434 *Neurol.* 2009;29(5):534-40.  
44  
45  
46 435 39. Huang ES, Liu JY, Moffet HH, John PM, Karter AJ. Glycemic control,  
47  
48  
49 436 complications, and death in older diabetic patients: the diabetes and aging study.  
50  
51 437 *Diabetes Care.* 2011;34(6):1329-36.  
52  
53  
54  
55  
56  
57  
58  
59  
60

1  
2  
3  
4  
5  
6 438 40. Ostgren CJ, Sundstrom J, Svennblad B, Lohm L, Nilsson PM, Johansson G.  
7  
8 439 Associations of HbA1c and educational level with risk of cardiovascular events in  
9  
10  
11 440 32,871 drug-treated patients with Type 2 diabetes: a cohort study in primary care.  
12  
13  
14 441 Diabet Med. 2013;30(5):e170-7.  
15  
16  
17 442  
18  
19  
20  
21  
22  
23  
24  
25  
26  
27  
28  
29  
30  
31  
32  
33  
34  
35  
36  
37  
38  
39  
40  
41  
42  
43  
44  
45  
46  
47  
48  
49  
50  
51  
52  
53  
54  
55  
56  
57  
58  
59  
60

For peer review only

Table 1 Baseline characteristics of study participants according to HbA<sub>1c</sub> (n=202,975).

|                                            | HbA <sub>1c</sub> (%) (mmol/mol) |               |                    |                    |                    |                    |                    |               |
|--------------------------------------------|----------------------------------|---------------|--------------------|--------------------|--------------------|--------------------|--------------------|---------------|
|                                            | Overall                          | <5.0<br>(<31) | 5.0-5.4<br>(31-36) | 5.5-5.9<br>(37-41) | 6.0-6.4<br>(42-46) | 6.5-6.9<br>(48-52) | 7.0-7.9<br>(53-63) | ≥8<br>(≥64)   |
| <b>Men</b>                                 |                                  |               |                    |                    |                    |                    |                    |               |
| n                                          | 131,689                          | 10,701        | 53,839             | 50,957             | 8,995              | 2,488              | 2,224              | 2,485         |
| Age (years)*                               | 44.6<br>(9.1)                    | 40.9<br>(8.2) | 42.6<br>(8.6)      | 45.7<br>(9.0)      | 49.6<br>(8.6)      | 51.7<br>(7.9)      | 51.6<br>(7.8)      | 49.2<br>(8.2) |
| Walking time, ≥60<br>min/day (%)           | 16                               | 16            | 17                 | 17                 | 15                 | 15                 | 16                 | 13            |
| Smoking status (%)                         |                                  |               |                    |                    |                    |                    |                    |               |
| Non-smoker                                 | 45.15                            | 44            | 44                 | 46                 | 47                 | 50                 | 46                 | 40            |
| Daily consuming<br>≤20 cigarettes/day      | 37.04                            | 39            | 39                 | 36                 | 34                 | 31                 | 32                 | 35            |
| Daily consuming<br>>20 cigarettes/day      | 17.8                             | 17            | 17                 | 18                 | 19                 | 19                 | 22                 | 25            |
| Alcohol<br>consumption (%)                 |                                  |               |                    |                    |                    |                    |                    |               |
| Non-drinker                                | 26                               | 19            | 24                 | 29                 | 31                 | 30                 | 33                 | 36            |
| Drinker <1<br>go/day                       | 35                               | 32            | 35                 | 36                 | 34                 | 34                 | 30                 | 32            |
| Drinker 1 to <2<br>go/day                  | 26                               | 30            | 27                 | 25                 | 25                 | 25                 | 26                 | 22            |
| Drinker ≥2<br>go/day                       | 12                               | 19            | 13                 | 10                 | 10                 | 11                 | 11                 | 10            |
| Self-reported<br>diabetes (%) <sup>‡</sup> | 2.3                              | 0.07          | 0.10               | 0.4                | 4.6                | 22.4               | 41.1               | 37.3          |
| BMI (kg/m <sup>2</sup> )*                  | 23.8<br>(3.5)                    | 22.6<br>(2.9) | 23.2<br>(3.1)      | 24.0<br>(3.5)      | 25.4<br>(4.0)      | 26.0<br>(4.2)      | 26.3<br>(4.3)      | 26.4<br>(4.5) |
| Hypertension (%) <sup>§</sup>              | 28                               | 21            | 22                 | 29                 | 44                 | 57                 | 57                 | 53            |
| Dyslipidemia (%) <sup>†</sup>              | 39                               | 29            | 33                 | 41                 | 54                 | 59                 | 60                 | 65            |
| <b>Women</b>                               |                                  |               |                    |                    |                    |                    |                    |               |
| n                                          | 71,286                           | 5,880         | 28,277             | 29,741             | 5,286              | 890                | 618                | 594           |
| Age (years)*                               | 47.1<br>(9.0)                    | 41.5<br>(7.6) | 44.6<br>(8.6)      | 49.0<br>(8.6)      | 52.6<br>(7.6)      | 53.9<br>(7.2)      | 53.9<br>(7.2)      | 52.0<br>(7.6) |
| Walking time, ≥60<br>min/day (%)           | 12                               | 11            | 11                 | 12                 | 13                 | 12                 | 13                 | 11            |
| Smoking status (%)                         |                                  |               |                    |                    |                    |                    |                    |               |
| Non-smoker                                 | 80                               | 71            | 77                 | 83                 | 86                 | 86                 | 83                 | 77            |
| Daily consuming<br>≤20 cigarettes/day      | 19                               | 26            | 21                 | 16                 | 13                 | 13                 | 16                 | 22            |
| Daily consuming<br>>20 cigarettes/day      | 1.4                              | 2.5           | 1.5                | 1.2                | 1.2                | 1.1                | 1.5                | 1.9           |
| Alcohol<br>consumption (%)                 |                                  |               |                    |                    |                    |                    |                    |               |
| Non-drinker                                | 60                               | 45            | 56                 | 65                 | 70                 | 74                 | 73                 | 78            |
| Drinker <1<br>go/day                       | 31                               | 36            | 34                 | 29                 | 26                 | 22                 | 22                 | 19            |
| Drinker 1 to <2<br>go/day                  | 6.8                              | 14.4          | 7.8                | 5.0                | 3.8                | 3.9                | 3.7                | 2.7           |
| Drinker ≥2<br>go/day                       | 1.7                              | 5.3           | 1.9                | 1.0                | 0.5                | 0.6                | 0.5                | 0.7           |
| Self-reported<br>diabetes (%) <sup>‡</sup> | 1.2                              | 0.05          | 0.03               | 0.1                | 2.5                | 17.4               | 38.2               | 47.5          |
| BMI (kg/m <sup>2</sup> )*                  | 22.3<br>(3.6)                    | 21.2<br>(2.9) | 21.6<br>(3.2)      | 22.5<br>(3.7)      | 23.9<br>(4.3)      | 25.5<br>(4.7)      | 26.4<br>(4.8)      | 26.6<br>(4.6) |
| Hypertension (%) <sup>§</sup>              | 19                               | 11            | 14                 | 21                 | 34                 | 52                 | 59                 | 53            |
| Dyslipidemia (%) <sup>†</sup>              | 22                               | 13            | 16                 | 24                 | 39                 | 54                 | 61                 | 59            |

Longitudinal survey of 202,950 examinees in All Japan Labor Welfare Foundation, Japan, 2008.

\* Mean (SD)

<sup>†</sup> One go contains ~23g of ethanol.

<sup>‡</sup> Self-reported diagnosis of diabetes or receiving medication.

<sup>§</sup> Systolic blood pressure ≥140mmHg, diastolic blood pressure ≥90 mmHg or receiving medication.

<sup>†</sup> Triglyceride level ≥150mg/dL (1.7mmol/L), high-density lipoprotein cholesterol level <40 mg/dL (1.04 mmol/L) in men and <50 mg/dL (1.3 mmol/L) in women or receiving medication.

Table 2 Hazard ratio of hearing impairment according to baseline HbA<sub>1c</sub> (n = 202,975).

|                       |             | HbA <sub>1c</sub> (%) (mmol/mol) |                 |                     |                     |                     |                     |                     | P for quadratic |
|-----------------------|-------------|----------------------------------|-----------------|---------------------|---------------------|---------------------|---------------------|---------------------|-----------------|
|                       |             | <5.0 (<31)                       | 5.0-5.4 (31-36) | 5.5-5.9 (37-41)     | 6.0-6.4 (42-46)     | 6.5-6.9 (48-52)     | 7.0-7.9 (53-63)     | ≥8 (≥64)            |                 |
| <b>Low frequency</b>  |             |                                  |                 |                     |                     |                     |                     |                     |                 |
| Men                   | Person-year | 54,055                           | 275,953         | 261,290             | 44,807              | 11,798              | 10,637              | 11,613              |                 |
|                       | No. cases   | 84                               | 447             | 548                 | 122                 | 45                  | 26                  | 39                  |                 |
|                       | Model 1     | 1.15 (0.91 to 1.45)              | 1.00            | 0.98 (0.86 to 1.11) | 0.94 (0.77 to 1.15) | 1.11 (0.81 to 1.51) | 0.73 (0.49 to 1.08) | 1.22 (0.88 to 1.70) | 0.15            |
|                       | Model 2     | 1.11 (0.88 to 1.40)              | 1.00            | 1.00 (0.88 to 1.14) | 0.98 (0.79 to 1.20) | 1.16 (0.84 to 1.60) | 0.75 (0.49 to 1.15) | 1.26 (0.88 to 1.80) | 0.27            |
| Women                 | Person-year | 28,447                           | 137,761         | 143,295             | 25,083              | 4,136               | 2,760               | 2,576               |                 |
|                       | No. cases   | 65                               | 415             | 553                 | 133                 | 18                  | 14                  | 9                   |                 |
|                       | Model 1     | 1.04 (0.80 to 1.35)              | 1.00            | 0.90 (0.79 to 1.03) | 0.94 (0.77 to 1.14) | 0.71 (0.44 to 1.14) | 0.86 (0.51 to 1.48) | 0.68 (0.35 to 1.31) | 0.79            |
|                       | Model 2     | 1.04 (0.80 to 1.35)              | 1.00            | 0.91 (0.80 to 1.03) | 0.93 (0.76 to 1.14) | 0.67 (0.41 to 1.10) | 0.77 (0.43 to 1.38) | 0.57 (0.28 to 1.19) | 0.51            |
| <b>High frequency</b> |             |                                  |                 |                     |                     |                     |                     |                     |                 |
| Men                   | Person-year | 53,617                           | 273,025         | 257,812             | 44,093              | 11,621              | 10,345              | 11,424              |                 |
|                       | No. cases   | 280                              | 1,610           | 1,941               | 416                 | 116                 | 128                 | 130                 |                 |
|                       | Model 1     | 1.05 (0.92 to 1.19)              | 1.00            | 0.98 (0.91 to 1.04) | 0.91 (0.82 to 1.02) | 0.82 (0.67 to 0.99) | 1.05 (0.88 to 1.26) | 1.15 (0.96 to 1.38) | 0.003           |
|                       | Model 2     | 1.03 (0.90 to 1.17)              | 1.00            | 0.99 (0.92 to 1.06) | 0.93 (0.83 to 1.03) | 0.84 (0.69 to 1.02) | 1.08 (0.89 to 1.32) | 1.18 (0.97 to 1.43) | 0.007           |
| Women                 | Person-year | 28,520                           | 138,232         | 143,882             | 25,246              | 4,124               | 2,753               | 2,555               |                 |
|                       | No. cases   | 23                               | 169             | 277                 | 67                  | 18                  | 13                  | 15                  |                 |
|                       | Model 1     | 1.02 (0.66 to 1.58)              | 1.00            | 1.00 (0.83 to 1.22) | 0.97 (0.73 to 1.29) | 1.43 (0.88 to 2.34) | 1.62 (0.92 to 2.86) | 2.41 (1.42 to 4.10) | 0.03            |
|                       | Model 2     | 1.03 (0.66 to 1.60)              | 1.00            | 0.97 (0.80 to 1.17) | 0.86 (0.64 to 1.16) | 1.17 (0.70 to 1.95) | 1.24 (0.67 to 2.29) | 1.78 (0.95 to 3.34) | 0.08            |

Model 1: Adjusted for age.

Model 2: Adjusted for age, walking time, smoking status, alcohol consumption, self-reported diabetes, BMI, hypertension and hyperlipidemia.

443

1  
2  
3  
4  
5 444 **Fig1.** The association between HbA1c and hearing impairment of high frequency stratified by smoking status.  
6 445 Footnote; Results obtained by multivariable Cox regression. The reference value was 5.0-5.4% of HbA1c in  
7 446 non-smoker. The model was adjusted for age (year, continuous), sex, body mass index (<18.5, 18.5-22.9, 23-29.9, or  
8 447  $\geq 30.0$  kg/m<sup>2</sup>), alcohol consumption (non-drinker, drinker consuming <1, 1 to <2, or  $\geq 2$  go of Japanese sake  
9 448 contains approximately 23g of ethanol), walking time (<60, or  $\geq 60$  min/day), self-reported diabetes, hypertension  
10 449 (systolic blood pressure  $\geq 140$ mmHg, diastolic blood pressure  $\geq 90$  mmHg or receiving medication), and  
11 450 hyperlipidemia (triglyceride level  $\geq 150$ mg/dL, high-density lipoprotein cholesterol level <40 mg/dL or receiving  
12 451 medication).

For peer review only



1  
2  
3  
4  
5 **Fig 2.** Adjusted hazard ratio of high frequency hearing impairment among participants with diabetes at baseline  
6 (n=10,154).  
7

8 Footnote; Results obtained by multivariable Cox regression with restricted cubic splines with seven knots (p1, p5,  
9 p25, p50, p75, p95 and p99). The reference value was 6.6% (p25) of HbA1c. The continuous line presents hazard  
10 ratios and the dashed line presents 95% confidence intervals. The model was adjusted for age (year, continuous), sex,  
11 body mass index (<18.5, 18.5-22.9, 23-29.9, or  $\geq 30.0$  kg/m<sup>2</sup>), smoking status (non-smoker, smoker consuming  $\leq 20$ ,  
12 or  $> 20$  cigarettes per day), alcohol consumption (non-drinker, drinker consuming  $<1$ ,  $1$  to  $<2$ , or  $\geq 2$  go of Japanese  
13 sake contains approximately 23g of ethanol), walking time (  $<60$ , or  $\geq 60$  min/day), hypertension (systolic blood  
14 pressure  $\geq 140$ mmHg, diastolic blood pressure  $\geq 90$  mmHg or receiving medication), and hyperlipidemia (triglyceride  
15 level  $\geq 150$ mg/dL, high-density lipoprotein cholesterol level  $<40$  mg/dL in men and  $<50$  mg/dL in women or  
16 receiving medication).  
17  
18  
19  
20

21 452  
22  
23  
24  
25  
26  
27  
28  
29  
30  
31  
32  
33  
34  
35  
36  
37  
38  
39  
40  
41  
42  
43  
44  
45  
46  
47  
48  
49  
50  
51  
52  
53  
54  
55  
56  
57  
58  
59  
60

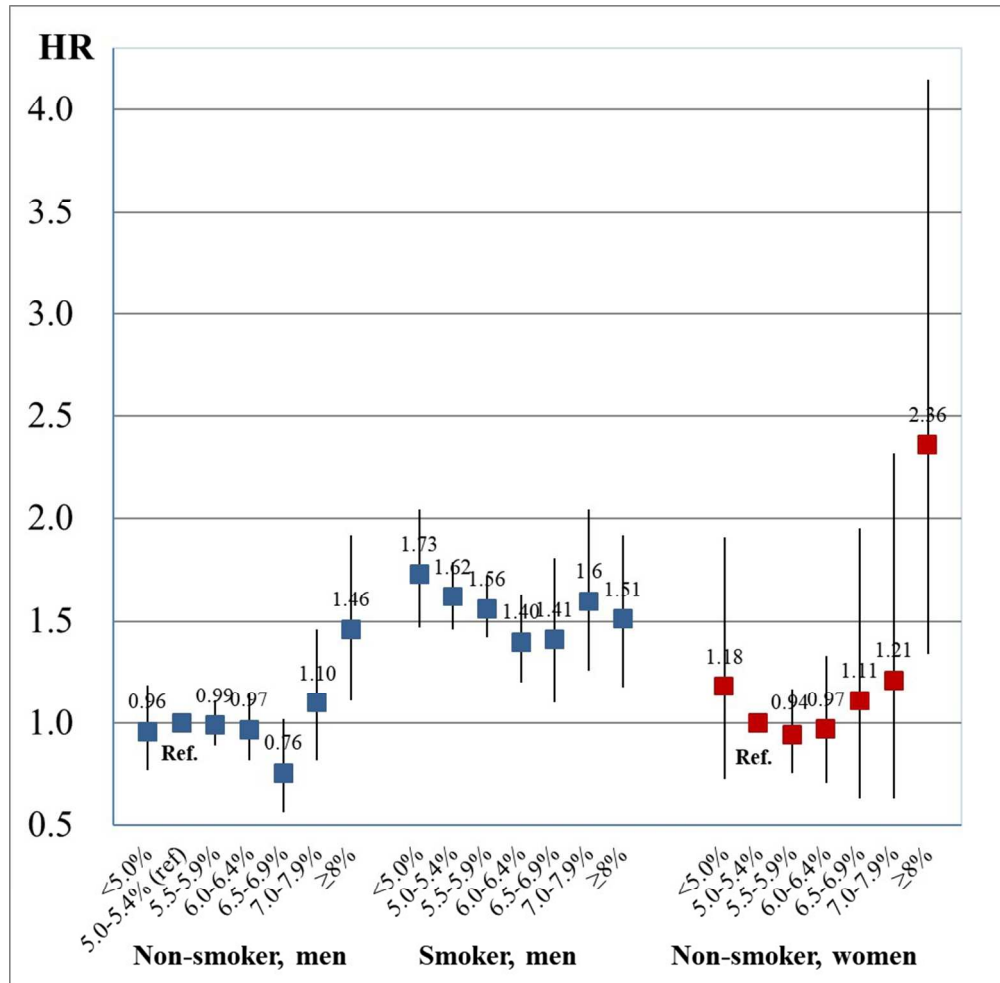

Fig1. The association between HbA1c and hearing impairment of high frequency stratified by smoking status.

Footnote; Results obtained by multivariable Cox regression. The reference value was 5.0-5.4% of HbA1c in non-smoker. The model was adjusted for age (year, continuous), sex, body mass index (<18.5, 18.5-22.9, 23-29.9, or ≥ 30.0 kg/m<sup>2</sup>), alcohol consumption (non-drinker, drinker consuming <1, 1 to < 2, or ≥ 2 go of Japanese sake contains approximately 23g of ethanol), walking time (<60, or ≥60 min/day), self-reported diabetes, hypertension (systolic blood pressure ≥140mmHg, diastolic blood pressure ≥90 mmHg or receiving medication), and hyperlipidemia (triglyceride level ≥150mg/dL, high-density lipoprotein cholesterol level <40 mg/dL or receiving medication).

270x265mm (96 x 96 DPI)

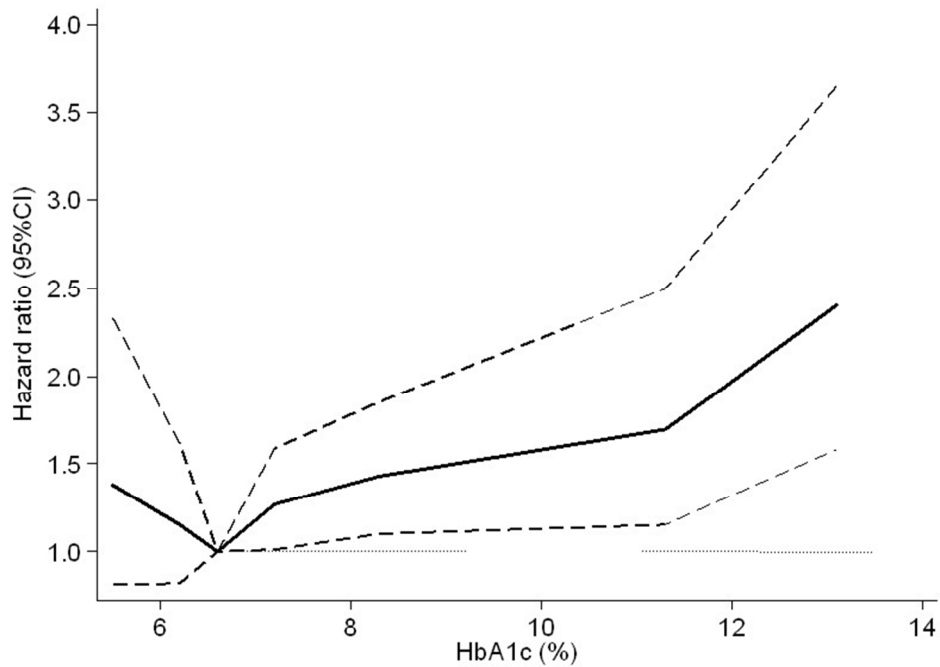

Fig 2. Adjusted hazard ratio of high frequency hearing impairment among participants with diabetes at baseline (n=10,154).

Footnote; Results obtained by multivariable Cox regression with restricted cubic splines with seven knots (p1, p5, p25, p50, p75, p95 and p99). The reference value was 6.6% (p25) of HbA1c. The continuous line presents hazard ratios and the dashed line presents 95% confidence intervals. The model was adjusted for age (year, continuous), sex, body mass index (<18.5, 18.5-22.9, 23-29.9, or  $\geq 30.0$  kg/m<sup>2</sup>), smoking status (non-smoker, smoker consuming  $\leq 20$ , or  $> 20$  cigarettes per day), alcohol consumption (non-drinker, drinker consuming <1, 1 to < 2, or  $\geq 2$  go of Japanese sake contains approximately 23g of ethanol), walking time (<60, or  $\geq 60$  min/day), hypertension (systolic blood pressure  $\geq 140$ mmHg, diastolic blood pressure  $\geq 90$  mmHg or receiving medication), and hyperlipidemia (triglyceride level  $\geq 150$ mg/dL, high-density lipoprotein cholesterol level <40 mg/dL in men and <50 mg/dL in women or receiving medication).

222x162mm (96 x 96 DPI)

**Appendix 1. The association between baseline HbA<sub>1c</sub> and Incidence of high frequency hearing impairment (n=126,823).**

|              |             | HbA <sub>1c</sub> (%) (mmol/mol) |                 |                     |                     |                     |                     |                     | P for quadratic |
|--------------|-------------|----------------------------------|-----------------|---------------------|---------------------|---------------------|---------------------|---------------------|-----------------|
|              |             | <5.0 (<31)                       | 5.0-5.4 (31-36) | 5.5-5.9 (37-41)     | 6.0-6.4 (42-46)     | 6.5-6.9 (48-52)     | 7.0-7.9 (53-63)     | ≥8 (≥64)            |                 |
| <b>Men</b>   | Person-year | 44,265                           | 227,740         | 215,647             | 36,368              | 9,184               | 8,148               | 8,888               |                 |
|              | No.cases    | 229                              | 1,345           | 1,535               | 329                 | 91                  | 99                  | 100                 |                 |
|              | non-smoker  | 0.94 (0.73 to 1.20)              | 1.00            | 0.93 (0.82 to 1.05) | 0.89 (0.73 to 1.07) | 0.68 (0.48 to 0.96) | 1.10 (0.80 to 1.53) | 1.37 (1.00 to 1.88) | 0.01            |
|              | smoker      | 1.06 (0.89 to 1.26)              | 1.00            | 0.95 (0.86 to 1.05) | 0.91 (0.77 to 1.07) | 1.00 (0.76 to 1.31) | 1.10 (0.84 to 1.44) | 1.04 (0.79 to 1.37) | 0.23            |
| <b>Women</b> | Person-year | 22,749                           | 110,979         | 114,327             | 19,601              | 3,143               | 2,062               | 1,813               |                 |
|              | No.cases    | 19                               | 140             | 214                 | 48                  | 15                  | 11                  | 13                  |                 |
|              | non-smoker  | 1.11 (0.65 to 1.91)              | 1.00            | 0.92 (0.72 to 1.18) | 0.88 (0.61 to 1.26) | 1.28 (0.69 to 2.35) | 1.47 (0.73 to 2.94) | 2.83 (1.53 to 5.24) | 0.005           |

Adjusted for age, walking time, alcohol consumption, self-reported diabetes, BMI, hypertension, hyperlipidemia and job type.

## STROBE Statement—checklist of items that should be included in reports of observational studies

|                           | Item No | Recommendation                                                                                                                                                                                                                                                                                                                                                                                                                                                                                                                                                                                                                                                                                   | Page number                            |
|---------------------------|---------|--------------------------------------------------------------------------------------------------------------------------------------------------------------------------------------------------------------------------------------------------------------------------------------------------------------------------------------------------------------------------------------------------------------------------------------------------------------------------------------------------------------------------------------------------------------------------------------------------------------------------------------------------------------------------------------------------|----------------------------------------|
| <b>Title and abstract</b> | 1       | (a) Indicate the study's design with a commonly used term in the title or the abstract<br>(b) Provide in the abstract an informative and balanced summary of what was done and what was found                                                                                                                                                                                                                                                                                                                                                                                                                                                                                                    | P1<br>Line1<br>P3 Line31,<br>P4 Line51 |
| <b>Introduction</b>       |         |                                                                                                                                                                                                                                                                                                                                                                                                                                                                                                                                                                                                                                                                                                  |                                        |
| Background/rationale      | 2       | Explain the scientific background and rationale for the investigation being reported                                                                                                                                                                                                                                                                                                                                                                                                                                                                                                                                                                                                             | P5 Line64-79                           |
| Objectives                | 3       | State specific objectives, including any prespecified hypotheses                                                                                                                                                                                                                                                                                                                                                                                                                                                                                                                                                                                                                                 | P6 Line83-88                           |
| <b>Methods</b>            |         |                                                                                                                                                                                                                                                                                                                                                                                                                                                                                                                                                                                                                                                                                                  |                                        |
| Study design              | 4       | Present key elements of study design early in the paper                                                                                                                                                                                                                                                                                                                                                                                                                                                                                                                                                                                                                                          | P7 Line90                              |
| Setting                   | 5       | Describe the setting, locations, and relevant dates, including periods of recruitment, exposure, follow-up, and data collection                                                                                                                                                                                                                                                                                                                                                                                                                                                                                                                                                                  | P7 Line90-107                          |
| Participants              | 6       | (a) <i>Cohort study</i> —Give the eligibility criteria, and the sources and methods of selection of participants. Describe methods of follow-up<br><i>Case-control study</i> —Give the eligibility criteria, and the sources and methods of case ascertainment and control selection. Give the rationale for the choice of cases and controls<br><i>Cross-sectional study</i> —Give the eligibility criteria, and the sources and methods of selection of participants<br>(b) <i>Cohort study</i> —For matched studies, give matching criteria and number of exposed and unexposed<br><i>Case-control study</i> —For matched studies, give matching criteria and the number of controls per case | P7 Line99-108                          |
| Variables                 | 7       | Clearly define all outcomes, exposures, predictors, potential confounders, and effect modifiers. Give diagnostic criteria, if applicable                                                                                                                                                                                                                                                                                                                                                                                                                                                                                                                                                         | P8<br>Line118-155                      |
| Data sources/measurement  | 8*      | For each variable of interest, give sources of data and details of methods of assessment (measurement). Describe comparability of assessment methods if there is more than one group                                                                                                                                                                                                                                                                                                                                                                                                                                                                                                             | P9<br>Line143-153                      |
| Bias                      | 9       | Describe any efforts to address potential sources of bias                                                                                                                                                                                                                                                                                                                                                                                                                                                                                                                                                                                                                                        | P15<br>Line271-278,<br>Line282         |
| Study size                | 10      | Explain how the study size was arrived at                                                                                                                                                                                                                                                                                                                                                                                                                                                                                                                                                                                                                                                        |                                        |
| Quantitative variables    | 11      | Explain how quantitative variables were handled in the analyses. If applicable, describe which groupings were chosen and why                                                                                                                                                                                                                                                                                                                                                                                                                                                                                                                                                                     | P9<br>Line127-143                      |
| Statistical methods       | 12      | (a) Describe all statistical methods, including those used to control for confounding<br>(b) Describe any methods used to examine subgroups and interactions                                                                                                                                                                                                                                                                                                                                                                                                                                                                                                                                     | P10<br>Line157-193<br>P11<br>Line173-  |

1  
2  
3  
4  
5  
6  
7  
8  
9  
10  
11  
12  
13  
14  
15  
16  
17  
18  
19  
20  
21  
22  
23  
24  
25  
26  
27  
28  
29  
30  
31  
32  
33  
34  
35  
36  
37  
38  
39  
40  
41  
42  
43  
44  
45  
46  
47  
48  
49  
50  
51  
52  
53  
54  
55  
56  
57  
58  
59  
60

|                                                                                                                                                                                                                                                                                                           |                        |
|-----------------------------------------------------------------------------------------------------------------------------------------------------------------------------------------------------------------------------------------------------------------------------------------------------------|------------------------|
|                                                                                                                                                                                                                                                                                                           | 184                    |
| (c) Explain how missing data were addressed                                                                                                                                                                                                                                                               | P7<br>Line105-<br>107  |
| (d) <i>Cohort study</i> —If applicable, explain how loss to follow-up was addressed<br><i>Case-control study</i> —If applicable, explain how matching of cases and controls was addressed<br><i>Cross-sectional study</i> —If applicable, describe analytical methods taking account of sampling strategy |                        |
| (e) Describe any sensitivity analyses                                                                                                                                                                                                                                                                     | P12<br>Line185-<br>187 |

Continued on next page

1  
2  
3  
4  
5  
6  
7  
8  
9  
10  
11  
12  
13  
14  
15  
16  
17  
18  
19  
20  
21  
22  
23  
24  
25  
26  
27  
28  
29  
30  
31  
32  
33  
34  
35  
36  
37  
38  
39  
40  
41  
42  
43  
44  
45  
46  
47  
48  
49  
50  
51  
52  
53  
54  
55  
56  
57  
58  
59  
60

| <b>Results</b>    |     |                                                                                                                                                                                                              |                               |
|-------------------|-----|--------------------------------------------------------------------------------------------------------------------------------------------------------------------------------------------------------------|-------------------------------|
| Participants      | 13* | (a) Report numbers of individuals at each stage of study—eg numbers potentially eligible, examined for eligibility, confirmed eligible, included in the study, completing follow-up, and analysed            | Table1,2,<br>Fig2             |
|                   |     | (b) Give reasons for non-participation at each stage                                                                                                                                                         | P11<br>Line178                |
|                   |     | (c) Consider use of a flow diagram                                                                                                                                                                           |                               |
| Descriptive data  | 14* | (a) Give characteristics of study participants (eg demographic, clinical, social) and information on exposures and potential confounders                                                                     | P12<br>Line196-200,<br>Table1 |
|                   |     | (b) Indicate number of participants with missing data for each variable of interest                                                                                                                          | P7<br>Line1001-109            |
|                   |     | (c) <i>Cohort study</i> —Summarise follow-up time (eg, average and total amount)                                                                                                                             | P12<br>Line201-206            |
| Outcome data      | 15* | <i>Cohort study</i> —Report numbers of outcome events or summary measures over time                                                                                                                          | P12<br>Line200-206            |
|                   |     | <i>Case-control study</i> —Report numbers in each exposure category, or summary measures of exposure                                                                                                         |                               |
|                   |     | <i>Cross-sectional study</i> —Report numbers of outcome events or summary measures                                                                                                                           |                               |
| Main results      | 16  | (a) Give unadjusted estimates and, if applicable, confounder-adjusted estimates and their precision (eg, 95% confidence interval). Make clear which confounders were adjusted for and why they were included | P13<br>Line215                |
|                   |     | (b) Report category boundaries when continuous variables were categorized                                                                                                                                    | P10<br>Line158-161            |
|                   |     | (c) If relevant, consider translating estimates of relative risk into absolute risk for a meaningful time period                                                                                             |                               |
| Other analyses    | 17  | Report other analyses done—eg analyses of subgroups and interactions, and sensitivity analyses                                                                                                               | P14<br>Line218-223            |
| <b>Discussion</b> |     |                                                                                                                                                                                                              |                               |
| Key results       | 18  | Summarise key results with reference to study objectives                                                                                                                                                     | P14<br>Line225-231            |
| Limitations       | 19  | Discuss limitations of the study, taking into account sources of potential bias or imprecision. Discuss both direction and magnitude of any potential bias                                                   | P17<br>Line271-284            |
| Interpretation    | 20  | Give a cautious overall interpretation of results considering objectives, limitations, multiplicity of analyses, results from similar studies, and other relevant evidence                                   | P17<br>Line285-290            |
| Generalisability  | 21  | Discuss the generalisability (external validity) of the study results                                                                                                                                        | P17<br>Line284-               |

---

**Other information**


---

|         |    |                                                                                                                                                               |                |
|---------|----|---------------------------------------------------------------------------------------------------------------------------------------------------------------|----------------|
| Funding | 22 | Give the source of funding and the role of the funders for the present study and, if applicable, for the original study on which the present article is based | P18<br>Line301 |
|---------|----|---------------------------------------------------------------------------------------------------------------------------------------------------------------|----------------|

\*Give information separately for cases and controls in case-control studies and, if applicable, for exposed and unexposed groups in cohort and cross-sectional studies.

**Note:** An Explanation and Elaboration article discusses each checklist item and gives methodological background and published examples of transparent reporting. The STROBE checklist is best used in conjunction with this article (freely available on the Web sites of PLoS Medicine at <http://www.plosmedicine.org/>, Annals of Internal Medicine at <http://www.annals.org/>, and Epidemiology at <http://www.epidem.com/>). Information on the STROBE Initiative is available at [www.strobe-statement.org](http://www.strobe-statement.org).



# BMJ Open

## Hemoglobin A1c and Hearing Impairment: longitudinal analysis using a large occupational health check-up data of Japan

|                                 |                                                                                                                                                                                                                                                                                                                                                                                                                                                                                                                                                                                                                                                                                                                                                                                                                                                                                                                                                                                                                                                                                                                                                                                                                                                                                                                                                                                                                                                                                                                                                                                                                                                                                                                                               |
|---------------------------------|-----------------------------------------------------------------------------------------------------------------------------------------------------------------------------------------------------------------------------------------------------------------------------------------------------------------------------------------------------------------------------------------------------------------------------------------------------------------------------------------------------------------------------------------------------------------------------------------------------------------------------------------------------------------------------------------------------------------------------------------------------------------------------------------------------------------------------------------------------------------------------------------------------------------------------------------------------------------------------------------------------------------------------------------------------------------------------------------------------------------------------------------------------------------------------------------------------------------------------------------------------------------------------------------------------------------------------------------------------------------------------------------------------------------------------------------------------------------------------------------------------------------------------------------------------------------------------------------------------------------------------------------------------------------------------------------------------------------------------------------------|
| Journal:                        | <i>BMJ Open</i>                                                                                                                                                                                                                                                                                                                                                                                                                                                                                                                                                                                                                                                                                                                                                                                                                                                                                                                                                                                                                                                                                                                                                                                                                                                                                                                                                                                                                                                                                                                                                                                                                                                                                                                               |
| Manuscript ID                   | bmjopen-2018-023220.R1                                                                                                                                                                                                                                                                                                                                                                                                                                                                                                                                                                                                                                                                                                                                                                                                                                                                                                                                                                                                                                                                                                                                                                                                                                                                                                                                                                                                                                                                                                                                                                                                                                                                                                                        |
| Article Type:                   | Research                                                                                                                                                                                                                                                                                                                                                                                                                                                                                                                                                                                                                                                                                                                                                                                                                                                                                                                                                                                                                                                                                                                                                                                                                                                                                                                                                                                                                                                                                                                                                                                                                                                                                                                                      |
| Date Submitted by the Author:   | 15-Jun-2018                                                                                                                                                                                                                                                                                                                                                                                                                                                                                                                                                                                                                                                                                                                                                                                                                                                                                                                                                                                                                                                                                                                                                                                                                                                                                                                                                                                                                                                                                                                                                                                                                                                                                                                                   |
| Complete List of Authors:       | Nagahama, Satsue; Toho University Graduate School of Medicine, Department of Environmental and Occupational Health; All Japan Labor Welfare Foundation, Division of Occupational Health and Promotion<br>Kashino, Ikuko; National Center for Global Health and Medicine, Department of Epidemiology and Prevention, Center for Clinical Sciences<br>Hu, Huanhuan; National Center for Global Health and Medicine, Department of Epidemiology and Prevention, Center for Clinical Sciences<br>Nanri, Akiko; Fukuoka Women's University, Department of Food and Health Sciences International College of Arts and Sciences<br>Kurotani, Kayo; National Institutes of Biomedical Innovation, Health and Nutrition, National Institute of Health and Nutrition, Department of Nutritional Epidemiology and Shokuiku<br>Kuwahara, Keisuke; Teikyo University, Graduate School of Public Health; National Center for Global Health and Medicine, Department of Epidemiology and Prevention, Center for Clinical Sciences<br>Dan, Masashi; All Japan Labor Welfare Foundation,<br>Michikawa, Takehiro; National Institute for Environmental Studies, Environmental Epidemiology Section, Center for Environmental Health Sciences<br>Akter, Shamima; National Center for Global Health and Medicine, Department of Epidemiology and Prevention, Center for Clinical Sciences<br>Mizoue, Tetsuya; National Center for Global Health and Medicine, Department of Epidemiology and Prevention, Center for Clinical Sciences<br>Murakami, Yoshitaka ; Toho University Graduate School of Medicine, Department of Medical statistics<br>Nishiwaki, Yuji; Toho University Graduate School of Medicine, Department of Environmental and Occupational Health |
| <b>Primary Subject Heading</b>: | Epidemiology                                                                                                                                                                                                                                                                                                                                                                                                                                                                                                                                                                                                                                                                                                                                                                                                                                                                                                                                                                                                                                                                                                                                                                                                                                                                                                                                                                                                                                                                                                                                                                                                                                                                                                                                  |
| Secondary Subject Heading:      | Diabetes and endocrinology, Ear, nose and throat/otolaryngology, Epidemiology                                                                                                                                                                                                                                                                                                                                                                                                                                                                                                                                                                                                                                                                                                                                                                                                                                                                                                                                                                                                                                                                                                                                                                                                                                                                                                                                                                                                                                                                                                                                                                                                                                                                 |
| Keywords:                       | EPIDEMIOLGY, Diabetes & endocrinology < INTERNAL MEDICINE, OCCUPATIONAL & INDUSTRIAL MEDICINE, Audiology < OTOLARYNGOLOGY                                                                                                                                                                                                                                                                                                                                                                                                                                                                                                                                                                                                                                                                                                                                                                                                                                                                                                                                                                                                                                                                                                                                                                                                                                                                                                                                                                                                                                                                                                                                                                                                                     |
|                                 |                                                                                                                                                                                                                                                                                                                                                                                                                                                                                                                                                                                                                                                                                                                                                                                                                                                                                                                                                                                                                                                                                                                                                                                                                                                                                                                                                                                                                                                                                                                                                                                                                                                                                                                                               |

1  
2  
3  
4  
5  
6  
7  
8  
9  
10  
11  
12  
13  
14  
15  
16  
17  
18  
19  
20  
21  
22  
23  
24  
25  
26  
27  
28  
29  
30  
31  
32  
33  
34  
35  
36  
37  
38  
39  
40  
41  
42  
43  
44  
45  
46  
47  
48  
49  
50  
51  
52  
53  
54  
55  
56  
57  
58  
59  
60

SCHOLARONE™  
Manuscripts

For peer review only

1 **Hemoglobin A1c and Hearing Impairment: longitudinal analysis using a large**

2 **occupational health check-up data of Japan**

3  
4 Satsue Nagahama 1 2 3\*, Ikuko Kashino 3, Huanhuan Hu 3, Akiko Nanri 4, Kayo

5 Kurotani 5, Keisuke Kuwahara 6 3, Masashi Dan 2, Takehiro Michikawa 7, Shamima

6 Akter 3, Tetsuya Mizoue 3, Yoshitaka Murakami 8, Yuji Nishiwaki 1

7  
8 1 Toho University Graduate School of Medicine, Department of Environmental and

9 Occupational Health, 5-21-16, Omorinishi, Otaku, Tokyo, 143-8540, Japan. Phone

10 +81-3-3762-4151(2403), Fax +81-3-5493-5416

11 E-mail: [satsue-n@umin.ac.jp](mailto:satsue-n@umin.ac.jp)

12 ;

13 2 All Japan Labor Welfare Foundation, Division of Occupational Health and Promotion,

14 6-16-11, Hatanodai, Shinagawa, Tokyo, 142-0064, Japan;

15 3 National Center for Global Health and Medicine, Department of Epidemiology and

16 Prevention, Center for Clinical Sciences, 1-21-1, Toyama, Shinjuku, Tokyo, Japan;

17 4 Fukuoka Women's University, Department of Food and Health Sciences International

18 College of Arts and Sciences, 1-1-1, Kasumigaoka, Higashiku, Fukuoka, Japan;

- 1  
2  
3  
4  
5  
6 19 5 National Institutes of Biomedical Innovation, Health and Nutrition, National Institute  
7  
8  
9 20 of Health and Nutrition, Department of Nutritional Epidemiology and Shokuiku, 1-23-1,  
10  
11 21 Toyama, Shinjuku, Tokyo, Japan;  
12  
13  
14 22 6 Teikyo University, Graduate School of Public Health, 2-11-1, Kaga, Itabashi, Tokyo,  
15  
16  
17 23 Japan;  
18  
19  
20 24 7 Centre for Health and Environmental Risk Research, National Institute for  
21  
22  
23 25 Environmental Studies, Environmental Epidemiology Section, 16-2, Onogawa,  
24  
25  
26 26 Tsukubashi, Ibaraki, Japan;  
27  
28  
29 27 8 Toho University Graduate School of Medicine, Department of Medical statistics,  
30  
31 28 5-21-16, Omorinishi, Otaku, Tokyo, Japan;  
32  
33  
34 29 \*Correspondence to S. Nagahama.  
35  
36

37 30

38  
39 31 Word count 3,091

40  
41  
42 32 Tables 2

43  
44  
45 33 Figures 2  
46  
47  
48  
49  
50  
51  
52  
53  
54  
55  
56  
57  
58  
59  
60

1  
2  
3  
4  
5  
6 34 **Objectives** The aim of this study was to determine whether hemoglobin A1c (HbA1c)  
7  
8 35 level is associated with the incidence of hearing impairment accounting for smoking  
9  
10  
11 36 status and diabetic condition at baseline.

12  
13  
14 37 **Methods** Participants were 131,689 men and 71,286 women aged 30-65 years and free  
15  
16  
17 38 of hearing impairment at baseline (2008) who attended annual health check-ups from  
18  
19  
20 39 2008 to 2015. We defined low frequency hearing impairment at a hearing threshold >30  
21  
22  
23 40 dB at 1 kHz and high frequency at >40 dB at 4 kHz in the better ear in pure-tone  
24  
25  
26 41 audiometric tests. HbA1c was categorized into 7 categories. The association between  
27  
28  
29 42 HbA1c and hearing impairment was assessed using the Cox proportional hazards  
30  
31  
32 43 model.

33  
34 44 **Results** On 5 years' mean follow-up, high HbA1c was associated with high frequency  
35  
36  
37 45 hearing impairment. In non-smokers, HbA1c  $\geq 8.0\%$  was associated with high frequency  
38  
39  
40 46 hearing impairment, with a multivariable hazard ratio (95% confidence interval)  
41  
42  
43 47 compared with HbA1c 5.0-5.4% of 1.46 (1.10-1.94) in men and 2.15 (1.13-4.10) in  
44  
45  
46 48 women. There was no significant association between HbA1c and hearing impairment  
47  
48  
49 49 in smokers. A J-shaped association between HbA1c and high frequency hearing  
50  
51  
52 50 impairment was observed for participants with diabetes at baseline. HbA1c was not  
53  
54  
55 51 associated with low frequency hearing impairment among any participants.

1  
2  
3  
4  
5  
6 52 **Conclusions** HbA1c  $\geq 8.0\%$  of non-smokers and  $\geq 7.3\%$  of participants with diabetes  
7  
8  
9 53 was associated with high frequency hearing impairment. These findings indicate that  
10  
11 54 appropriate glycemic control may prevent diabetic-related hearing impairment.  
12  
13  
14  
15

55

16  
17 56 **Strengths and limitations of this study**  
18

19  
20 57 ▪ This study included a large number of participants, accounting for gender and smoking  
21  
22  
23 58 status.

24  
25 59 ▪ To determine whether HbA1c was associated with hearing impairment among  
26  
27  
28 60 participants with diabetes at baseline.

29  
30  
31 61 ▪ Information on noise exposure, ototoxic drug use, ear surgery, and ear infection was  
32  
33  
34 62 not obtained.  
35

63

1  
2  
3  
4  
5  
6 **64 BACKGROUND**

7  
8  
9 **65** Patients with hearing impairment experience a range of complications, including  
10  
11 **66** impaired quality of life, dementia, depression, loneliness, poor self-esteem and  
12  
13  
14 **67** functional disability (1-4). These complications have made this condition a social and  
15  
16  
17 **68** economic problem worldwide. More than 5% of the world population has hearing  
18  
19  
20 **69** impairment, and this is expected to increase with the aging of the population (5).  
21  
22  
23 **70** Although this bleak picture points to the importance of identifying preventable risk  
24  
25  
26 **71** factors for hearing impairment, such studies are in fact scarce.  
27  
28  
29 **72** Emerging evidence suggests that diabetes mellitus may be a risk factor for hearing  
30  
31  
32 **73** impairment. Meta-analyses of 13 cross-sectional studies showed that subjects with  
33  
34  
35 **74** diabetes had a 2-fold-increased risk of developing hearing impairment (odds ratio 2.15,  
36  
37  
38 **75** 95%CI 1.72-2.68) (6). Diabetic hearing impairment is hypothesized to be due to  
39  
40  
41 **76** microvascular complications (7, 8). Diabetic hearing impairment may thus be prevented  
42  
43  
44 **77** by appropriate glyceic control, which has been shown to be effective for other  
45  
46  
47 **78** microvascular complications of diabetes, such as retinopathy, nephropathy and  
48  
49  
50 **79** neuropathy (9-12). Three studies have reported the association between hearing  
51  
52  
53 **80** impairment and hemoglobin A1c (HbA1c), an indicator for glyceic control (13-15).  
54  
55  
56 **81** One of these reported a positive dose-relationship between HbA1c and hearing  
57  
58  
59  
60

1  
2  
3  
4  
5  
6 82 impairment as defined using a pure-tone average threshold of mainly low frequencies  
7  
8  
9 83 (15), while the other two reported that HbA1c was positively associated with high  
10  
11 84 frequency hearing impairment (13, 14). Nevertheless, no study has yet reported the  
12  
13  
14 85 precise shape of the dose-relationship between HbA1c and high frequency hearing  
15  
16  
17 86 impairment. Furthermore, no study has yet investigated whether HbA1c is associated  
18  
19  
20 87 with hearing impairment among those with diabetes.  
21  
22  
23 88 In Japan, a pure-tone audiometric test is mandatory in annual occupational health  
24  
25  
26 89 check-ups (16). The large sample size this affords has enabled us to investigate the  
27  
28  
29 90 dose-response relationship between HbA1c and hearing impairment, while accounting  
30  
31  
32 91 for well-known risk factors of hearing impairment such as gender and smoking (17, 18).  
33  
34  
35 92 The present study had two aims. The first aim was to investigate the association  
36  
37  
38 93 between HbA1c and the incidence of hearing impairment using a large dataset from  
39  
40  
41 94 annual occupational health check-ups in Japan, accounting for gender and smoking  
42  
43  
44 95 status. The second aim was to determine whether HbA1c was associated with hearing  
45  
46  
47 96 impairment among participants with diabetes.  
48  
49

97

## 98 **METHODS**

### 99 **Study population**



1  
2  
3  
4  
5  
6 100 The present study was conducted using data from annual health check-ups of Japanese  
7  
8  
9 101 workers. The All Japan Labor Welfare Foundation, a health service provider with  
10  
11 102 centers in Tokyo, Aomori, Nagano, Yamagata, Ibaraki, Gunma and Nagoya provided the  
12  
13  
14 103 data from April 2008 through Dec 2015, allowing a maximum of 7 years of follow-up.  
15  
16  
17 104 In Japan, annual health check-ups are mandatory for all employees and include a  
18  
19  
20 105 hearing test under the Industrial Safety and Health Act. Nearly all employees attend a  
21  
22  
23 106 health check-up every year. Participants were mainly Japanese employees but also  
24  
25  
26 107 included a small number of their dependents, employers and foreign workers.  
27  
28 108 A total of 312,512 participants aged 30-65 years underwent a hearing test and HbA1c  
29  
30  
31 109 test at baseline (between Apr 2008 and Mar 2009). Of these, we excluded participants  
32  
33  
34 110 with hearing impairment at baseline (n=51,489). Given that diabetic patients with  
35  
36  
37 111 complications may receive more intensive treatments, which may bias the association  
38  
39  
40 112 between HbA1c and hearing impairment, we excluded participants with cardiovascular  
41  
42  
43 113 disease and stroke (n=913). We further excluded participants who did not attend any  
44  
45  
46 114 subsequent health examinations or hearing tests (n=48,618). After further exclusion of  
47  
48  
49 115 8,517 participants with missing information on covariates (5,011 for smoking status,  
50  
51  
52 116 5,152 for alcohol consumption, 1,815 for physical activity data, 5 for body mass index  
53  
54  
55 117 (BMI), 9 for hypertension and 9 for dyslipidemia data; some participants had missing  
56  
57  
58  
59  
60

1  
2  
3  
4  
5  
6 118 data for more than one parameter), leaving 202,975 participants (131,689 men and  
7  
8 119 71,286 women) for analysis.

10  
11 120 Ethics

12  
13  
14 121 We obtained written informed consent from each participant who attended the health  
15  
16  
17 122 check-up after April 2013. Before March 2013, we disclosed the purpose of our study  
18  
19  
20 123 by posters and the participants had the opportunity to refuse the use of their data for the  
21  
22  
23 124 study. This procedure conforms to the Japanese Ethical Guidelines for Medical and  
24  
25  
26 125 Health Research Involving Human Subjects, where the obtaining consent may be  
27  
28  
29 126 simplified for observational studies using existing data. The research protocol including  
30  
31  
32 127 consent procedure was approved by the Ethics Committee of the Faculty of Medicine,  
33  
34 128 Toho University (No. 25017 and No.A16130) and the Ethics Committee of the National  
35  
36  
37 129 Center for Global Health and Medicine (No. NCGM-G-001254-02).

38  
39  
40 130 Ascertainment of hearing impairment

41  
42 131 Trained staff performed pure-tone air-conduction audiometry using an audiometer  
43  
44  
45 132 (AA-57, RION Inc., Tokyo, Japan). Low frequency hearing impairment was defined as  
46  
47  
48 133 failure to hear a pure-tone signal of 30dB at 1 kHz in the better ear, and high frequency  
49  
50  
51 134 hearing impairment as failure to hear a pure-tone signal of 40dB at 4 kHz in the better  
52  
53  
54 135 ear. These thresholds are recommended for use in annual health check-ups by Ministry

1  
2  
3  
4  
5  
6 136 of Health, Labor and Welfare in Japan (16). Onset of hearing impairment was defined as  
7  
8  
9 137 the day of the health check-up on which hearing impairment was first detected.  
10  
11 138 Data collection and measurements at baseline (between Apr 2008 and Mar 2009)  
12  
13  
14 139 We used a self-administered questionnaire developed by the Ministry of Health, Labor  
15  
16  
17 140 and Welfare for a specific health examination, namely the national health checkup  
18  
19  
20 141 system focused on metabolic syndrome (19), to assess medical history, regular physical  
21  
22  
23 142 activity (walking time  $<60$  min/day or  $\geq 60$  min/day), smoking status (non-smoker, daily  
24  
25  
26 143 smoker  $\leq 20$  cigarettes/day or  $>20$  cigarettes/day), alcohol consumption (non-drinker,  $<1$   
27  
28  
29 144 *go*, 1 to  $<2$  *go* or  $\geq 2$  *go*/day; one *go* of sake, a traditional Japanese beverage, is equal to  
30  
31  
32 145 about 180 mL of 10-14% ethanol and contains about 23 g of ethanol) (20), and  
33  
34  
35 146 self-reported diabetes (treatments with anti-diabetic medication or a self-reported  
36  
37  
38 147 history of diabetes: yes or no). Job type was categorized as professional job,  
39  
40  
41 148 management, office job, sales, service, telegraph, manufacturing, transportation and  
42  
43  
44 149 other. Height was measured to the nearest 0.1 cm and weight to the nearest 0.1 kg. Body  
45  
46  
47 150 mass index (BMI) was calculated as the weight in kilograms divided by the square of  
48  
49  
50 151 height in metres and categorized into 4 groups ( $<18.5$ , 18.5-22.9, 23-29.9,  $\geq 30$ kg/m<sup>2</sup>).  
51  
52  
53 152 Blood pressure was measured in the sitting position using an automated  
54  
55  
56 153 sphygmomanometer (HEM-907, Omron, Kyoto, Japan). Participants with high blood

1  
2  
3  
4  
5  
6 154 pressure ( $\geq 130$  mmHg systolic or  $\geq 85$  mmHg diastolic) received a second measurement  
7  
8  
9 155 and the average was used for the analysis. Hypertension was defined by  $\geq 140$  mmHg  
10  
11 156 systolic,  $\geq 90$  mmHg diastolic or the use of medication for hypertension. A venous blood  
12  
13  
14 157 sample was collected and stored in a cooler at 4 °C for transportation to an external  
15  
16  
17 158 laboratory (SRL, Tokyo, Japan). Triglyceride level was measured using an enzymatic  
18  
19  
20 159 colorimetric test and high-density lipoprotein cholesterol (HDL-C) was determined  
21  
22  
23 160 using a direct method. Dyslipidemia was defined by triglyceride  $\geq 150$  mg/dL (1.7  
24  
25  
26 161 mmol/L) in men and women, HDL-C  $< 40$  mg/dL (1.04 mmol/L) in men and  $< 50$  mg/dL  
27  
28  
29 162 (1.3 mmol/L) in women or use of medication for dyslipidemia. HbA1c was measured by  
30  
31  
32 163 latex agglutination turbidimetry and converted to the National Glycohemoglobin  
33  
34  
35 164 Standardization Program equivalent value (%) using the formula below, according to the  
36  
37  
38 165 Japan Diabetes Society statement (21) :  
39  
40 166  $\text{HbA1c (\%)} = 1.02 \times \text{HbA1c (Japan Diabetes Society) (\%)} + 0.25\%$   
41  
42  
43 167 Diabetes was defined as  $\text{FPG} \geq 126$  mg/dL,  $\text{HbA1c} \geq 6.5\%$ , or self-reported diabetes.  
44  
45  
46 168 Statistical analysis  
47  
48  
49 169 Participants were divided into 7 groups according to their HbA1c level at baseline  
50  
51  
52 170 [ $< 5.0\%$  (31 mmol/mol), 5.0-5.4% (31-36 mmol/mol), 5.5-5.9% (37-41 mmol/mol),  
53  
54  
55 171 6.0-6.4% (42-46 mmol/mol), 6.5-6.9% (48-52 mmol/mol), 7.0-7.9% (53-63 mmol/mol),  
56  
57  
58  
59  
60

1  
2  
3  
4  
5  
6 172  $\geq 8.0\%$  (64 mmol/mol)]. The HbA1c group specific baseline characteristics of  
7  
8  
9 173 participants were described as means (SD) for continuous variables and percentages for  
10  
11 174 categorical variables. Person-years was calculated from baseline to the onset of hearing  
12  
13  
14 175 impairment, or the date of the last health check-up through Dec 2015 (whichever  
15  
16  
17 176 occurred first). Crude incident rates of hearing impairment were shown in events per  
18  
19  
20 177 1000 person-years. Survival analyses were performed using Cox regression to estimate  
21  
22  
23 178 the hazard ratio (HR) with 95% confidence interval (CI) for the incidence of hearing  
24  
25  
26 179 impairment across HbA1c categories, with 5.0-5.4% (31-36mmol/mol) as the reference  
27  
28  
29 180 value. The analyses were stratified by sex because the interaction between hearing  
30  
31 181 impairments and sex was significant ( $p$  for interaction  $<0.001$ ). Age-adjusted model  
32  
33  
34 182 (model 1) and multiple-adjusted model (model 2), which included alcohol consumption,  
35  
36  
37 183 physical activity, BMI, hypertension, dyslipidemia, self-reported diabetes and smoking  
38  
39  
40 184 status were used for the analysis. Although smoking status itself was related to hearing  
41  
42  
43 185 impairment in this study, the association between HbA1c and hearing impairment  
44  
45  
46 186 differed according to smoking status ( $p$  for interaction  $<0.001$ ). We therefore  
47  
48  
49 187 additionally performed analyses according to combined HbA1c (7 groups) and smoking  
50  
51  
52 188 status (non-smoker and current smoker), by considering HbA1c 5.0-5.4%  
53  
54 189 (31-36mmol/mol) and non-smoker as the reference category. We did not analyze  
55  
56  
57  
58  
59  
60

1  
2  
3  
4  
5  
6 190 women's smokers because of the small number of cases. To assess whether control of  
7  
8  
9 191 HbA1c would reduce the incidence of hearing impairment in those with diabetes, we  
10  
11 192 elucidated the shape of the relationship between HbA1c and high frequency hearing  
12  
13  
14 193 impairment among those with diabetes. We fitted restricted cubic splines models with  
15  
16  
17 194 seven knots placed at the 1th, 5th, 25th, 50th, 75th, 95th, and 99th centiles as reference  
18  
19  
20 195 values of HbA1c 6.6% (25th) (22). The HRs were adjusted for alcohol consumption,  
21  
22  
23 196 physical activity, BMI, hypertension, dyslipidemia and smoking status. As a sensitivity  
24  
25  
26 197 analysis, we further adjusted for job type in the main analyses (model 2) among  
27  
28  
29 198 participants with this information (n=126,823). We tested the proportional hazards  
30  
31  
32 199 assumption using Schoenfeld residuals. We found no significant deviations for any  
33  
34  
35 200 covariate. P value of two-tailed test <0.05 was considered statistically significant. Trend  
36  
37  
38 201 association was assessed by assigning ordinal numbers (0–6) to the HbA1c categories.  
39  
40  
41 202 We calculated the p for the quadratic trend because it was a better fit for the data than  
42  
43  
44 203 the simple linear model. All statistical analyses were performed using Stata version 12.1  
45  
46  
47 204 (StataCorp, College Station, Texas, USA).

48 205

49  
50  
51 206 **RESULTS**

1  
2  
3  
4  
5  
6 207 Baseline characteristics by category of HbA1c are shown in Table 1. The mean age of  
7  
8  
9 208 participants was 45 years for men and 47 years for women. Participants who had higher  
10  
11 209 HbA1c tended to be non-drinkers and to have higher BMI, hypertension, and  
12  
13  
14 210 dyslipidemia in both men and women. Male participants with higher HbA1c tended to  
15  
16  
17 211 be smokers consuming > 20 cigarettes per day.  
18  
19  
20 212 In men, 4,621 developed high frequency hearing impairment with 661,937 person-years  
21  
22  
23 213 (mean duration of follow-up was 5.0 years) and 1,311 developed low frequency hearing  
24  
25  
26 214 impairment with 670,153 person-years (5.1 years). In women, 582 developed high  
27  
28  
29 215 frequency hearing impairment with 345,312 person-years (4.8 years) and 1,207  
30  
31  
32 216 developed low frequency hearing impairment with 344,057 person-years (4.8 years).  
33  
34 217 Table 2 shows the association between HbA1c and the incidence of hearing impairment.  
35  
36  
37 218 In the multivariable-adjusted model, HbA1c showed a quadratic trend with the  
38  
39  
40 219 incidence of high frequency hearing impairment in men (p for quadratic=0.007), and a  
41  
42  
43 220 statistically marginal association in women (p for quadratic=0.08). HbA1c was not  
44  
45  
46 221 associated with low frequency hearing impairment. Figure 1 shows the association  
47  
48  
49 222 between HbA1c and high frequency hearing impairment with accounting for smoking  
50  
51  
52 223 status [the interaction between HbA1c and smoking status (p for interaction <0.001)].  
53  
54  
55 224 Compared to non-smokers with HbA1c 5.0-5.4% (31-36mmol/mol), non-smokers with  
56  
57  
58  
59  
60

1  
2  
3  
4  
5  
6 225 HbA1c  $\geq$ 8.0% (64 mmol/mol) showed an association with hearing impairment [HR  
7  
8 226 (95%CI) of 1.46 (1.11-1.92) in men and 2.36 (1.34-4.15) in women]. Although smokers  
9  
10  
11 227 had higher HRs of hearing impairment than non-smokers, HbA1c level was not  
12  
13  
14 228 associated with hearing impairment among smokers. Additional adjustments for job  
15  
16  
17 229 type did not affect the results (Appendix 1).  
18  
19  
20 230 Figure 2 shows the spline regression model of high frequency hearing impairment at  
21  
22  
23 231 various HbA1c levels against a reference HbA1c level of 6.6% in participants with  
24  
25  
26 232 diabetes at baseline (n=10,154). The relationship between HbA1c and the incidence of  
27  
28  
29 233 hearing impairment was J-shaped, with the significant increase of HR for HbA1c $\geq$ 7.2%.  
30  
31 234  
32  
33

## 34 235 **DISCUSSION**

35  
36  
37 236 In this study, we found a quadratic trend between HbA1c and the incidence of  
38  
39  
40 237 high frequency hearing impairment. In particular, HbA1c concentrations over 8.0% (64  
41  
42  
43 238 mmol/mol) were associated with high frequency hearing impairment among  
44  
45  
46 239 non-smokers. A J-shaped association between HbA1c and high frequency hearing  
47  
48  
49 240 impairment was observed among participants with diabetes at baseline. Our findings  
50  
51  
52 241 indicate that appropriate glycemic control may prevent the incidence of diabetic hearing  
53  
54  
55 242 impairment.  
56  
57  
58  
59  
60



1  
2  
3  
4  
5  
6 243 Our finding of a quadratic trend between HbA1c and hearing impairment is  
7  
8  
9 244 supported by the results of two longitudinal studies. (13, 15) One of these reported an  
10  
11 245 odds ratio (95% CI) of high frequency hearing impairment per 1.0% increase in HbA1c  
12  
13  
14 246 of 1.52 (1.03 to 2.23), albeit no statistical association between the three categories of  
15  
16  
17 247 HbA1c and high frequency hearing impairment (13). The second reported that HbA1c  
18  
19  
20 248 was positively associated with average hearing threshold, mainly among low  
21  
22  
23 249 frequencies (15). The present study provides novel evidence that an HbA1c of 8.0% (64  
24  
25 250 mmol/mol) or above is associated with increased risk of high frequency hearing  
26  
27  
28 251 impairment in non-smokers. Our findings are consistent with the work of Cruickshanks  
29  
30  
31 252 et al., who reported that poor glycemic control, defined by a glycosylated hemoglobin  
32  
33  
34 253 level, was associated with hearing impairment (23).

35  
36  
37 254 Additionally, we found that the J-shaped association between HbA1c and  
38  
39  
40 255 hearing impairment remained even among participants with diabetes at baseline. This  
41  
42  
43 256 result suggests that proper glycemic control may prevent diabetic-related hearing  
44  
45  
46 257 impairment even in those with diabetes. Previous studies have also reported a J-shaped  
47  
48  
49 258 association between HbA1c and diabetics complications, and noted that hypoglycemia  
50  
51 259 might increase diabetic complications (24-26). More research is needed to determine a  
52  
53  
54  
55  
56  
57  
58  
59  
60

1  
2  
3  
4  
5  
6 260 suitable HbA1c level for glycaemic targeting to prevent hearing impairment in diabetic  
7  
8  
9 261 management.

10  
11 262 We found that high frequency hearing impairment has a quadratic trend with  
12  
13  
14 263 HbA1c among non-smokers but not smokers. Previous studies have reported an adverse  
15  
16  
17 264 effect of smoking cigarettes on hearing impairment (23, 27, 28). It is plausible that the  
18  
19  
20 265 effect of smoking cigarettes may be stronger than HbA1c and might mask the effect of  
21  
22  
23 266 HbA1c. Further research is needed to confirm the joint effect of smoking and HbA1c on  
24  
25  
26 267 hearing impairment.

27  
28 268 The pathophysiology underlying high-HbA1c-associated hearing impairment is  
29  
30  
31 269 unclear, which allows for speculation. One possible explanation is that  
32  
33  
34 270 hyperglycemia-related microvascular complications lead to thickening of the cochlea  
35  
36  
37 271 and vestibulopathy, and result in hearing impairment (7, 8, 29-33). Diabetic-related  
38  
39  
40 272 hearing impairment has been mainly observed at high frequencies, suggesting that high  
41  
42  
43 273 frequency-specific areas of the cochlea may be more fragile to ischemic changes due to  
44  
45  
46 274 microvascular complications (34-38). This mechanism is supported by the J-shaped  
47  
48  
49 275 association between HbA1c and hearing impairment observed in the present study, since  
50  
51  
52 276 previous studies also reported a J-shaped-association between HbA1c and diabetic  
53  
54 277 vascular complications (39, 40). Further studies to confirm this idea are required.  
55  
56  
57  
58  
59  
60

1  
2  
3  
4  
5  
6 278 This study has several strengths. The large dataset allowed us to investigate the  
7  
8  
9 279 association between HbA1c and hearing impairment with comprehensive adjustment for  
10  
11  
12 280 covariates, and additionally, among participants with diabetes at baseline. Audiometry  
13  
14  
15 281 to confirm hearing impairment was conducted by trained staff. Several limitations of the  
16  
17  
18 282 study also need to be considered. First, though noise exposure is an important risk factor  
19  
20  
21 283 on hearing impairment (41, 42), information on noise exposure was not available and  
22  
23  
24 284 thus noise information was not considered in the analyses. The present study thus might  
25  
26  
27 285 include the cofounding influence of noise exposure. However, a previous study reported  
28  
29  
30 286 that the relationship between diabetes and hearing impairment was independent of this  
31  
32  
33 287 variable (37). Moreover, in the present study, HbA1c level was associated with hearing  
34  
35  
36 288 impairment even after accounting for job type in a sensitivity analysis. Second,  
37  
38  
39 289 information on ototoxic drug use, ear surgery, and ear infection was not collected, and  
40  
41  
42 290 we were therefore unable to exclude cases of hearing impairment due to these factors.  
43  
44  
45 291 Third, blood pressure was measured once, followed by a second measurement if the first  
46  
47  
48 292 systolic blood pressure  $\geq 130$  mmHg systolic or diastolic blood pressure  $\geq 85$  mmHg. All  
49  
50  
51 293 participants didn't have the same evaluation of blood pressure. This may lead to  
52  
53  
54 294 misclassification of hypertension. Fourth, we did not account for gender or smoking  
55  
56  
57 295 status in the association between HbA1c and hearing impairment for participants with

1  
2  
3  
4  
5  
6 296 diabetes because of the small sample size. Fifth, the hearing test was only conducted at  
7  
8  
9 297 1 kHz and 4 kHz. Hearing impairment at other frequencies could not therefore be  
10  
11 298 identified. Sixth, we cannot exclude the possibility of residual confounding and  
12  
13  
14 299 confounding by unmeasured variables. Finally, the study participants were mainly  
15  
16  
17 300 workers, and thus caution is required when generalizing our findings.  
18  
19

## 20 301 **CONCLUSION**

21  
22 302 We found the quadratic trend between HbA1c and the incidence of high  
23  
24  
25 303 frequency hearing impairment in non-smokers. The trend between HbA1c and hearing  
26  
27  
28 304 impairment remained even among those with diabetes. These findings indicate that  
29  
30  
31 305 diabetic-related hearing impairment may be prevented with appropriate glycemic  
32  
33  
34 306 control. These findings warrant confirmation in interventional studies.  
35

## 36 307 **Abbreviations**

37  
38  
39 308 HbA1c: hemoglobin A1c; BMI: body mass index; HR: hazard ratio; CI: confidence  
40  
41  
42 309 interval  
43

## 44 310 **Acknowledgements**

45  
46  
47  
48 311 The authors would like to thank Dr Nobuo Yanagisawa and Dr Takeshi Kawaguchi for  
49  
50  
51 312 coordinating the study.  
52

## 53 313 **Contributors**

1  
2  
3  
4  
5  
6 314 SN, TaM and IK designed study and drafted the manuscript. SN, HHH, KaK, AN and

7  
8 315 KeK performed the data analysis. MD collected and interpreted the data. All authors

9  
10  
11 316 participated in interpretation of the findings, revised the paper critically for important

12  
13  
14 317 intellectual content and approved the final version to be published. YN and YM

15  
16  
17 318 provided administrative, technical and material support. SN and YN are guarantors.

18  
19  
20 319 Funding

21  
22  
23 320 This research was funded by All Japan Labor Welfare Foundation Research Fellowship.

24  
25  
26 321 Competing interests

27  
28  
29 322 None declared. SN is occupational physicians in the participating company.

30  
31  
32 323 Ethics approval

33  
34  
35 324 The research protocol was approved by the Ethics Committee of the Faculty of

36  
37  
38 325 Medicine, Toho University and the Ethics Committee of the National Center for Global

39  
40  
41 326 Health and Medicine.

42  
43  
44 327 Patient and public involvement

45  
46  
47 328 No patient were involved in setting the research question or the outcome measures,

48  
49  
50 329 planning for the design of the study. Detail has been removed from this case

51  
52  
53 330 description/these case descriptions to ensure anonymity. Patient consent was not

54  
55  
56 331 required for the study.

1  
2  
3  
4  
5  
6  
7  
8  
9  
10  
11  
12  
13  
14  
15  
16  
17  
18  
19  
20  
21  
22  
23  
24  
25  
26  
27  
28  
29  
30  
31  
32  
33  
34  
35  
36  
37  
38  
39  
40  
41  
42  
43  
44  
45  
46  
47  
48  
49  
50  
51  
52  
53  
54  
55  
56  
57  
58  
59  
60

332 Data sharing statement  
333 No additional data are available.  
334

For peer review only

## 335 References

- 336 1. Lin FR, Metter EJ, O'Brien RJ, Resnick SM, Zonderman AB, Ferrucci L. Hearing  
337 loss and incident dementia. *Arch Neurol*. 2011;68(2):214-20.
- 338 2. Li CM, Zhang X, Hoffman HJ, Cotch MF, Themann CL, Wilson MR. Hearing  
339 impairment associated with depression in US adults, National Health and Nutrition  
340 Examination Survey 2005-2010. *JAMA Otolaryngol Head Neck Surg*.  
341 2014;140(4):293-302.
- 342 3. Herbst KG, Humphrey C. Hearing impairment and mental state in the elderly living  
343 at home. *Br Med J*. 1980;281(6245):903-5.
- 344 4. Wilson BS, Tucci DL, Merson MH, O'Donoghue GM. Global hearing health care:  
345 new findings and perspectives. *Lancet*. 2017;390(10111):2503-15.
- 346 5. WHO [Internet]. Deafness and hearing loss.  
347 <http://www.who.int/mediacentre/factsheets/fs300/en>. Accessed 11 Jan 2018.
- 348 6. Horikawa C, Kodama S, Tanaka S, Fujihara K, Hirasawa R, Yachi Y, et al. Diabetes  
349 and risk of hearing impairment in adults: a meta-analysis. *J Clin Endocrinol Metab*.  
350 2013;98(1):51-8.

- 1  
2  
3  
4  
5  
6 351 7. Fukushima H, Cureoglu S, Schachern PA, Paparella MM, Harada T, Oktay MF.  
7  
8 352 Effects of type 2 diabetes mellitus on cochlear structure in humans. *Arch Otolaryngol*  
9  
10  
11 353 *Head Neck Surg.* 2006;132(9):934-8.  
12  
13  
14 354 8. Oron Y, Elgart K, Marom T, Roth Y. Cardiovascular risk factors as causes for hearing  
15  
16  
17 355 impairment. *Audiol Neurootol.* 2014;19(4):256-60.  
18  
19  
20 356 9. Klein R, Klein BE, Moss SE. Relation of glycemic control to diabetic microvascular  
21  
22  
23 357 complications in diabetes mellitus. *Ann Intern Med.* 1996;124(1 Pt 2):90-6.  
24  
25  
26 358 10. Danne T, Weber B, Dinesen B, Mortensen HB. Threshold of HbA1c for the effect of  
27  
28  
29 359 hyperglycemia on the risk of diabetic microangiopathy. *Diabetes Care.* 1996;19(2):183.  
30  
31  
32 360 11. Li W, Katzmarzyk PT, Horswell R, Wang Y, Johnson J, Hu G. HbA1c and all-cause  
33  
34  
35 361 mortality risk among patients with type 2 diabetes. *Int J Cardiol.* 2016;202:490-6.  
36  
37  
38 362 12. 5. Glycemic Targets. *Diabetes Care.* 2016;39 Suppl 1:S39-46.  
39  
40  
41 363 13. Michikawa T, Mizutari K, Saito H, Takebayashi T, Nishiwaki Y. Glycosylated  
42  
43  
44 364 hemoglobin level is associated with hearing impairment in older Japanese: the  
45  
46  
47 365 Kurabuchi Study. *J Am Geriatr Soc.* 2014;62(7):1231-7.  
48  
49  
50 366 14. Kang SH, Jung DJ, Cho KH, Park JW, Lee KY, Do JY. Association Between HbA1c  
51  
52  
53 367 Level and Hearing Impairment in a Nondiabetic Adult Population. *Metabolic Syndrome*  
54  
55  
56 368 *and Related Disorders.* 2016;14(2):129-34.  
57  
58  
59  
60



- 1  
2  
3  
4  
5  
6 369 15. Kim MB, Zhang Y, Chang Y, Ryu S, Choi Y, Kwon MJ, et al. Diabetes mellitus and  
7  
8  
9 370 the incidence of hearing loss: a cohort study. *Int J Epidemiol*. 2016.  
10  
11 371 16. Japan Industrial Safety and Health Association (English Page): Ordinance on  
12  
13  
14 372 Industrial Safety and Health, Article 44 Periodical Medical Examination, (iii).  
15  
16  
17 373 [http://www.japaneselawtranslation.go.jp/law/detail\\_main?re=01&ia=03&vm=02&id=1](http://www.japaneselawtranslation.go.jp/law/detail_main?re=01&ia=03&vm=02&id=1)  
18  
19  
20 374 984. Accessed 11 Jan 2018.  
21  
22  
23 375 17. Rigters SC, Metselaar M, Wieringa MH, Baatenburg de Jong RJ, Hofman A,  
24  
25  
26 376 Goedegebure A. Contributing Determinants to Hearing Loss in Elderly Men and  
27  
28  
29 377 Women: Results from the Population-Based Rotterdam Study. *Audiol Neurootol*.  
30  
31 378 2016;21 Suppl 1:10-5.  
32  
33  
34 379 18. Helzner EP, Cauley JA, Pratt SR, Wisniewski SR, Zmuda JM, Talbott EO, et al.  
35  
36  
37 380 Race and sex differences in age-related hearing loss: the Health, Aging and Body  
38  
39  
40 381 Composition Study. *J Am Geriatr Soc*. 2005;53(12):2119-27.  
41  
42  
43 382 19. Ministry of Health, Labour and Welfare (English Page): Specific Health Checkups  
44  
45  
46 383 and Specific Health Guidance. <http://www.mhlw.go.jp/english/wp/wp-hw3/dl/2-007.pdf>.  
47  
48  
49 384 Accessed 11 Jan 2018.  
50  
51 385 20. Ministry of Health, Labour and Welfare (Japanese Page): Health guidance  
52  
53  
54 386 Questionnaire.  
55  
56  
57  
58  
59  
60

- 1  
2  
3  
4  
5  
6 387 [http://www.mhlw.go.jp/seisakunitsuite/bunya/kenkou\\_iryoku/kenkou/seikatsu/dl/hoken-p](http://www.mhlw.go.jp/seisakunitsuite/bunya/kenkou_iryoku/kenkou/seikatsu/dl/hoken-p)  
7  
8  
9 388 rogram2\_02.pdf. Accessed 11 Jan 2018.
- 10  
11 389 21. Kashiwagi A, Kasuga M, Araki E, Oka Y, Hanafusa T, Ito H, et al. International  
12  
13  
14 390 clinical harmonization of glycated hemoglobin in Japan: From Japan Diabetes Society  
15  
16  
17 391 to National Glycohemoglobin Standardization Program values. *J Diabetes Investig.*  
18  
19  
20 392 2012;3(1):39-40.
- 21  
22  
23 393 22. Harrell F. *Regression Modeling Strategies: With Applications to Linear Models,*  
24  
25  
26 394 *Logistic and Ordinal Regression, and Survival Analysis*: Springer International  
27  
28  
29 395 Publishing; 2015.
- 30  
31 396 23. Cruickshanks KJ, Nondahl DM, Dalton DS, Fischer ME, Klein BE, Klein R, et al.  
32  
33  
34 397 Smoking, central adiposity, and poor glycemic control increase risk of hearing  
35  
36  
37 398 impairment. *J Am Geriatr Soc.* 2015;63(5):918-24.
- 38  
39  
40 399 24. Carson AP, Fox CS, McGuire DK, Levitan EB, Laclaustra M, Mann DM, et al. Low  
41  
42  
43 400 hemoglobin A1c and risk of all-cause mortality among US adults without diabetes. *Circ*  
44  
45  
46 401 *Cardiovasc Qual Outcomes.* 2010;3(6):661-7.
- 47  
48  
49 402 25. Goto A, Noda M, Matsushita Y, Goto M, Kato M, Isogawa A, et al. Hemoglobin a1c  
50  
51  
52 403 levels and the risk of cardiovascular disease in people without known diabetes: a  
53  
54  
55 404 population-based cohort study in Japan. *Medicine (Baltimore).* 2015;94(17):e785.

- 1  
2  
3  
4  
5  
6 405 26. Snell-Bergeon JK, Wadwa RP. Hypoglycemia, diabetes, and cardiovascular disease.  
7  
8  
9 406 Diabetes Technol Ther. 2012;14 Suppl 1:S51-8.  
10  
11 407 27. Barone JA, Peters JM, Garabrant DH, Bernstein L, Krebsbach R. Smoking as a risk  
12  
13  
14 408 factor in noise-induced hearing loss. J Occup Med. 1987;29(9):741-5.  
15  
16  
17 409 28. Nomura K, Nakao M, Morimoto T. Effect of smoking on hearing loss: quality  
18  
19  
20 410 assessment and meta-analysis. Prev Med. 2005;40(2):138-44.  
21  
22  
23 411 29. Lisowska G, Namyslowski G, Morawski K, Strojek K. Cochlear dysfunction and  
24  
25  
26 412 diabetic microangiopathy. Scand Audiol Suppl. 2001(52):199-203.  
27  
28  
29 413 30. Akinpelu OV, Ibrahim F, Waissbluth S, Daniel SJ. Histopathologic changes in the  
30  
31  
32 414 cochlea associated with diabetes mellitus--a review. Otol Neurotol. 2014;35(5):764-74.  
33  
34  
35 415 31. Krogsgaard LT, Jorgensen KJ, Gronhoj Larsen C, Gotzsche PC. General health checks  
36  
37  
38 416 in adults for reducing morbidity and mortality from disease: Cochrane systematic  
39  
40  
41 417 review and meta-analysis. BMJ (Clinical research ed.). 2012;345:e7191.  
42  
43  
44 418 32. Kazmierczak H, Doroszewska G. Metabolic disorders in vertigo, tinnitus, and  
45  
46  
47 419 hearing loss. Int Tinnitus J. 2001;7(1):54-8.  
48  
49  
50 420 33. Nash SD, Cruickshanks KJ, Klein R, Klein BE, Nieto FJ, Huang GH, et al. The  
51  
52  
53 421 prevalence of hearing impairment and associated risk factors: the Beaver Dam  
54  
55  
56 422 Offspring Study. Arch Otolaryngol Head Neck Surg. 2011;137(5):432-9.  
57  
58  
59  
60

- 1  
2  
3  
4  
5  
6 423 34. Uchida Y, Sugiura S, Ando F, Nakashima T, Shimokata H. Diabetes reduces auditory  
7  
8  
9 424 sensitivity in middle-aged listeners more than in elderly listeners: a population- based  
10  
11 425 study of age-related hearing loss. *Med Sci Monit.* 2010;16(7):Ph63-8.  
12  
13  
14 426 35. Konrad-Martin D, Reavis KM, Austin D, Reed N, Gordon J, McDermott D, et al.  
15  
16  
17 427 Hearing Impairment in Relation to Severity of Diabetes in a Veteran Cohort. *Ear Hear.*  
18  
19  
20 428 2015;36(4):381-94.  
21  
22  
23 429 36. Bainbridge KE, Hoffman HJ, Cowie CC. Risk factors for hearing impairment  
24  
25  
26 430 among U.S. adults with diabetes: National Health and Nutrition Examination Survey  
27  
28  
29 431 1999-2004. *Diabetes Care.* 2011;34(7):1540-5.  
30  
31 432 37. Bainbridge KE, Hoffman HJ, Cowie CC. Diabetes and hearing impairment in the  
32  
33  
34 433 United States: audiometric evidence from the National Health and Nutrition  
35  
36  
37 434 Examination Survey, 1999 to 2004. *Ann Intern Med.* 2008;149(1):1-10.  
38  
39  
40 435 38. Kim JS, Lee H. Inner ear dysfunction due to vertebrobasilar ischemic stroke. *Semin*  
41  
42  
43 436 *Neurol.* 2009;29(5):534-40.  
44  
45  
46 437 39. Huang ES, Liu JY, Moffet HH, John PM, Karter AJ. Glycemic control,  
47  
48  
49 438 complications, and death in older diabetic patients: the diabetes and aging study.  
50  
51 439 *Diabetes Care.* 2011;34(6):1329-36.  
52  
53  
54  
55  
56  
57  
58  
59  
60

- 1  
2  
3  
4  
5  
6 440 40. Ostgren CJ, Sundstrom J, Svennblad B, Lohm L, Nilsson PM, Johansson G.  
7  
8 441 Associations of HbA1c and educational level with risk of cardiovascular events in  
9  
10  
11 442 32,871 drug-treated patients with Type 2 diabetes: a cohort study in primary care.  
12  
13  
14 443 Diabet Med. 2013;30(5):e170-7.  
15  
16  
17 444 41. Lie A, Skogstad M, Johannessen HA, Tynes T, Mehlum IS, Nordby KC, et al.  
18  
19  
20 445 Occupational noise exposure and hearing: a systematic review. Int Arch Occup Environ  
21  
22  
23 446 Health. 2016 Apr;89(3):351-72.  
24  
25  
26 447 42. Henderson D, Bielefeld EC, Harris KC, Hu BH. The role of oxidative stress in  
27  
28 448 noise-induced hearing loss. Ear Hear. 2006 Feb;27(1):1-19.  
29  
30  
31 449  
32  
33  
34 450  
35  
36  
37  
38  
39  
40  
41  
42  
43  
44  
45  
46  
47  
48  
49  
50  
51  
52  
53  
54  
55  
56  
57  
58  
59  
60

Table 1 Baseline characteristics of study participants according to HbA<sub>1c</sub> (n=202,975).

|                                            | HbA <sub>1c</sub> (%) (mmol/mol) |               |                    |                    |                    |                    |                    |               |
|--------------------------------------------|----------------------------------|---------------|--------------------|--------------------|--------------------|--------------------|--------------------|---------------|
|                                            | Overall                          | <5.0<br>(<31) | 5.0-5.4<br>(31-36) | 5.5-5.9<br>(37-41) | 6.0-6.4<br>(42-46) | 6.5-6.9<br>(48-52) | 7.0-7.9<br>(53-63) | ≥8<br>(≥64)   |
| <b>Men</b>                                 |                                  |               |                    |                    |                    |                    |                    |               |
| n                                          | 131,689                          | 10,701        | 53,839             | 50,957             | 8,995              | 2,488              | 2,224              | 2,485         |
| Age (years)*                               | 44.6<br>(9.1)                    | 40.9<br>(8.2) | 42.6<br>(8.6)      | 45.7<br>(9.0)      | 49.6<br>(8.6)      | 51.7<br>(7.9)      | 51.6<br>(7.8)      | 49.2<br>(8.2) |
| Walking time, ≥60<br>min/day (%)           | 16                               | 16            | 17                 | 17                 | 15                 | 15                 | 16                 | 13            |
| Smoking status (%)                         |                                  |               |                    |                    |                    |                    |                    |               |
| Non-smoker                                 | 45.15                            | 44            | 44                 | 46                 | 47                 | 50                 | 46                 | 40            |
| Daily consuming<br>≤20 cigarettes/day      | 37.04                            | 39            | 39                 | 36                 | 34                 | 31                 | 32                 | 35            |
| Daily consuming<br>>20 cigarettes/day      | 17.8                             | 17            | 17                 | 18                 | 19                 | 19                 | 22                 | 25            |
| Alcohol<br>consumption (%)                 |                                  |               |                    |                    |                    |                    |                    |               |
| Non-drinker                                | 26                               | 19            | 24                 | 29                 | 31                 | 30                 | 33                 | 36            |
| Drinker <1<br>go/day <sup>†</sup>          | 35                               | 32            | 35                 | 36                 | 34                 | 34                 | 30                 | 32            |
| Drinker 1 to <2<br>go/day <sup>†</sup>     | 26                               | 30            | 27                 | 25                 | 25                 | 25                 | 26                 | 22            |
| Drinker ≥2<br>go/day <sup>†</sup>          | 12                               | 19            | 13                 | 10                 | 10                 | 11                 | 11                 | 10            |
| Self-reported<br>diabetes (%) <sup>‡</sup> | 2.3                              | 0.07          | 0.10               | 0.4                | 4.6                | 22.4               | 41.1               | 37.3          |
| BMI (kg/m <sup>2</sup> )*                  | 23.8<br>(3.5)                    | 22.6<br>(2.9) | 23.2<br>(3.1)      | 24.0<br>(3.5)      | 25.4<br>(4.0)      | 26.0<br>(4.2)      | 26.3<br>(4.3)      | 26.4<br>(4.5) |
| Hypertension (%) <sup>§</sup>              | 28                               | 21            | 22                 | 29                 | 44                 | 57                 | 57                 | 53            |
| Dyslipidemia (%) <sup>  </sup>             | 39                               | 29            | 33                 | 41                 | 54                 | 59                 | 60                 | 65            |
| <b>Women</b>                               |                                  |               |                    |                    |                    |                    |                    |               |
| n                                          | 71,286                           | 5,880         | 28,277             | 29,741             | 5,286              | 890                | 618                | 594           |
| Age (years)*                               | 47.1<br>(9.0)                    | 41.5<br>(7.6) | 44.6<br>(8.6)      | 49.0<br>(8.6)      | 52.6<br>(7.6)      | 53.9<br>(7.2)      | 53.9<br>(7.2)      | 52.0<br>(7.6) |
| Walking time, ≥60<br>min/day (%)           | 12                               | 11            | 11                 | 12                 | 13                 | 12                 | 13                 | 11            |
| Smoking status (%)                         |                                  |               |                    |                    |                    |                    |                    |               |
| Non-smoker                                 | 80                               | 71            | 77                 | 83                 | 86                 | 86                 | 83                 | 77            |
| Daily consuming<br>≤20 cigarettes/day      | 19                               | 26            | 21                 | 16                 | 13                 | 13                 | 16                 | 22            |
| Daily consuming<br>>20 cigarettes/day      | 1.4                              | 2.5           | 1.5                | 1.2                | 1.2                | 1.1                | 1.5                | 1.9           |
| Alcohol<br>consumption (%)                 |                                  |               |                    |                    |                    |                    |                    |               |
| Non-drinker                                | 60                               | 45            | 56                 | 65                 | 70                 | 74                 | 73                 | 78            |
| Drinker <1<br>go/day <sup>†</sup>          | 31                               | 36            | 34                 | 29                 | 26                 | 22                 | 22                 | 19            |
| Drinker 1 to <2<br>go/day <sup>†</sup>     | 6.8                              | 14.4          | 7.8                | 5.0                | 3.8                | 3.9                | 3.7                | 2.7           |
| Drinker ≥2<br>go/day <sup>†</sup>          | 1.7                              | 5.3           | 1.9                | 1.0                | 0.5                | 0.6                | 0.5                | 0.7           |
| Self-reported<br>diabetes (%) <sup>‡</sup> | 1.2                              | 0.05          | 0.03               | 0.1                | 2.5                | 17.4               | 38.2               | 47.5          |
| BMI (kg/m <sup>2</sup> )*                  | 22.3<br>(3.6)                    | 21.2<br>(2.9) | 21.6<br>(3.2)      | 22.5<br>(3.7)      | 23.9<br>(4.3)      | 25.5<br>(4.7)      | 26.4<br>(4.8)      | 26.6<br>(4.6) |
| Hypertension (%) <sup>§</sup>              | 19                               | 11            | 14                 | 21                 | 34                 | 52                 | 59                 | 53            |
| Dyslipidemia (%) <sup>  </sup>             | 22                               | 13            | 16                 | 24                 | 39                 | 54                 | 61                 | 59            |

Longitudinal survey of 202,950 examinees in All Japan Labor Welfare Foundation, Japan, 2008.

\* Mean (SD)

<sup>†</sup> One go contains ~23g of ethanol.

<sup>‡</sup> Self-reported diagnosis of diabetes or receiving medication.

<sup>§</sup> Systolic blood pressure ≥140mmHg, diastolic blood pressure ≥90 mmHg or receiving medication.

<sup>||</sup> Triglyceride level ≥150mg/dL (1.7mmol/L), high-density lipoprotein cholesterol level <40 mg/dL (1.04 mmol/L) in men and <50 mg/dL (1.3 mmol/L) in women or receiving medication.

Table 2 Hazard ratio of hearing impairment according to baseline HbA<sub>1c</sub> (n = 202,975).

|                       |             | HbA <sub>1c</sub> (%) (mmol/mol) |                 |                     |                     |                     |                     |                     | P for quadratic |
|-----------------------|-------------|----------------------------------|-----------------|---------------------|---------------------|---------------------|---------------------|---------------------|-----------------|
|                       |             | <5.0 (<31)                       | 5.0-5.4 (31-36) | 5.5-5.9 (37-41)     | 6.0-6.4 (42-46)     | 6.5-6.9 (48-52)     | 7.0-7.9 (53-63)     | ≥8 (≥64)            |                 |
| <b>Low frequency</b>  |             |                                  |                 |                     |                     |                     |                     |                     |                 |
| Men                   | Person-year | 54,055                           | 275,953         | 261,290             | 44,807              | 11,798              | 10,637              | 11,613              |                 |
|                       | No. cases   | 84                               | 447             | 548                 | 122                 | 45                  | 26                  | 39                  |                 |
|                       | Model 1     | 1.15 (0.91 to 1.45)              | 1.00            | 0.98 (0.86 to 1.11) | 0.94 (0.77 to 1.15) | 1.11 (0.81 to 1.51) | 0.73 (0.49 to 1.08) | 1.22 (0.88 to 1.70) | 0.15            |
|                       | Model 2     | 1.11 (0.88 to 1.40)              | 1.00            | 1.00 (0.88 to 1.14) | 0.98 (0.79 to 1.20) | 1.16 (0.84 to 1.60) | 0.75 (0.49 to 1.15) | 1.26 (0.88 to 1.80) | 0.27            |
| Women                 | Person-year | 28,447                           | 137,761         | 143,295             | 25,083              | 4,136               | 2,760               | 2,576               |                 |
|                       | No. cases   | 65                               | 415             | 553                 | 133                 | 18                  | 14                  | 9                   |                 |
|                       | Model 1     | 1.04 (0.80 to 1.35)              | 1.00            | 0.90 (0.79 to 1.03) | 0.94 (0.77 to 1.14) | 0.71 (0.44 to 1.14) | 0.86 (0.51 to 1.48) | 0.68 (0.35 to 1.31) | 0.79            |
|                       | Model 2     | 1.04 (0.80 to 1.35)              | 1.00            | 0.91 (0.80 to 1.03) | 0.93 (0.76 to 1.14) | 0.67 (0.41 to 1.10) | 0.77 (0.43 to 1.38) | 0.57 (0.28 to 1.19) | 0.51            |
| <b>High frequency</b> |             |                                  |                 |                     |                     |                     |                     |                     |                 |
| Men                   | Person-year | 53,617                           | 273,025         | 257,812             | 44,093              | 11,621              | 10,345              | 11,424              |                 |
|                       | No. cases   | 280                              | 1,610           | 1,941               | 416                 | 116                 | 128                 | 130                 |                 |
|                       | Model 1     | 1.05 (0.92 to 1.19)              | 1.00            | 0.98 (0.91 to 1.04) | 0.91 (0.82 to 1.02) | 0.82 (0.67 to 0.99) | 1.05 (0.88 to 1.26) | 1.15 (0.96 to 1.38) | 0.003           |
|                       | Model 2     | 1.03 (0.90 to 1.17)              | 1.00            | 0.99 (0.92 to 1.06) | 0.93 (0.83 to 1.03) | 0.84 (0.69 to 1.02) | 1.08 (0.89 to 1.32) | 1.18 (0.97 to 1.43) | 0.007           |
| Women                 | Person-year | 28,520                           | 138,232         | 143,882             | 25,246              | 4,124               | 2,753               | 2,555               |                 |
|                       | No. cases   | 23                               | 169             | 277                 | 67                  | 18                  | 13                  | 15                  |                 |
|                       | Model 1     | 1.02 (0.66 to 1.58)              | 1.00            | 1.00 (0.83 to 1.22) | 0.97 (0.73 to 1.29) | 1.43 (0.88 to 2.34) | 1.62 (0.92 to 2.86) | 2.41 (1.42 to 4.10) | 0.03            |
|                       | Model 2     | 1.03 (0.66 to 1.60)              | 1.00            | 0.97 (0.80 to 1.17) | 0.86 (0.64 to 1.16) | 1.17 (0.70 to 1.95) | 1.24 (0.67 to 2.29) | 1.78 (0.95 to 3.34) | 0.08            |

Model 1: Adjusted for age.

Model 2: Adjusted for age, walking time, smoking status, alcohol consumption, self-reported diabetes, BMI, hypertension and hyperlipidemia.

451

1  
2  
3  
4  
5 452 **Fig1.** The association between HbA1c and hearing impairment of high frequency stratified by smoking status.  
6 453 Footnote; Results obtained by multivariable Cox regression. The reference value was 5.0-5.4% of HbA1c in  
7 454 non-smoker. The model was adjusted for age (year, continuous), sex, body mass index (<18.5, 18.5-22.9, 23-29.9, or  
8 455  $\geq 30.0$  kg/m<sup>2</sup>), alcohol consumption (non-drinker, drinker consuming <1, 1 to <2, or  $\geq 2$  go of Japanese sake  
9 456 contains approximately 23g of ethanol), walking time (<60, or  $\geq 60$  min/day), self-reported diabetes, hypertension  
10 457 (systolic blood pressure  $\geq 140$ mmHg, diastolic blood pressure  $\geq 90$  mmHg or receiving medication), and  
11 458 hyperlipidemia (triglyceride level  $\geq 150$ mg/dL, high-density lipoprotein cholesterol level <40 mg/dL or receiving  
12 459 medication).

For peer review only



1  
2  
3  
4  
5 **Fig 2.** Adjusted hazard ratio of high frequency hearing impairment among participants with diabetes at baseline  
6 (n=10,154).  
7

8 Footnote; Results obtained by multivariable Cox regression with restricted cubic splines with seven knots (p1, p5,  
9 p25, p50, p75, p95 and p99). The reference value was 6.6% (p25) of HbA1c. The continuous line presents hazard  
10 ratios and the dashed line presents 95% confidence intervals. The model was adjusted for age (year, continuous), sex,  
11 body mass index (<18.5, 18.5-22.9, 23-29.9, or  $\geq 30.0$  kg/m<sup>2</sup>), smoking status (non-smoker, smoker consuming  $\leq 20$ ,  
12 or  $> 20$  cigarettes per day), alcohol consumption (non-drinker, drinker consuming  $<1$ ,  $1$  to  $< 2$ , or  $\geq 2$  go of Japanese  
13 sake contains approximately 23g of ethanol), walking time (  $<60$ , or  $\geq 60$  min/day), hypertension (systolic blood  
14 pressure  $\geq 140$ mmHg, diastolic blood pressure  $\geq 90$  mmHg or receiving medication), and hyperlipidemia (triglyceride  
15 level  $\geq 150$ mg/dL, high-density lipoprotein cholesterol level  $<40$  mg/dL in men and  $<50$  mg/dL in women or  
16 receiving medication).  
17  
18  
19  
20

21 460  
22  
23  
24  
25  
26  
27  
28  
29  
30  
31  
32  
33  
34  
35  
36  
37  
38  
39  
40  
41  
42  
43  
44  
45  
46  
47  
48  
49  
50  
51  
52  
53  
54  
55  
56  
57  
58  
59  
60

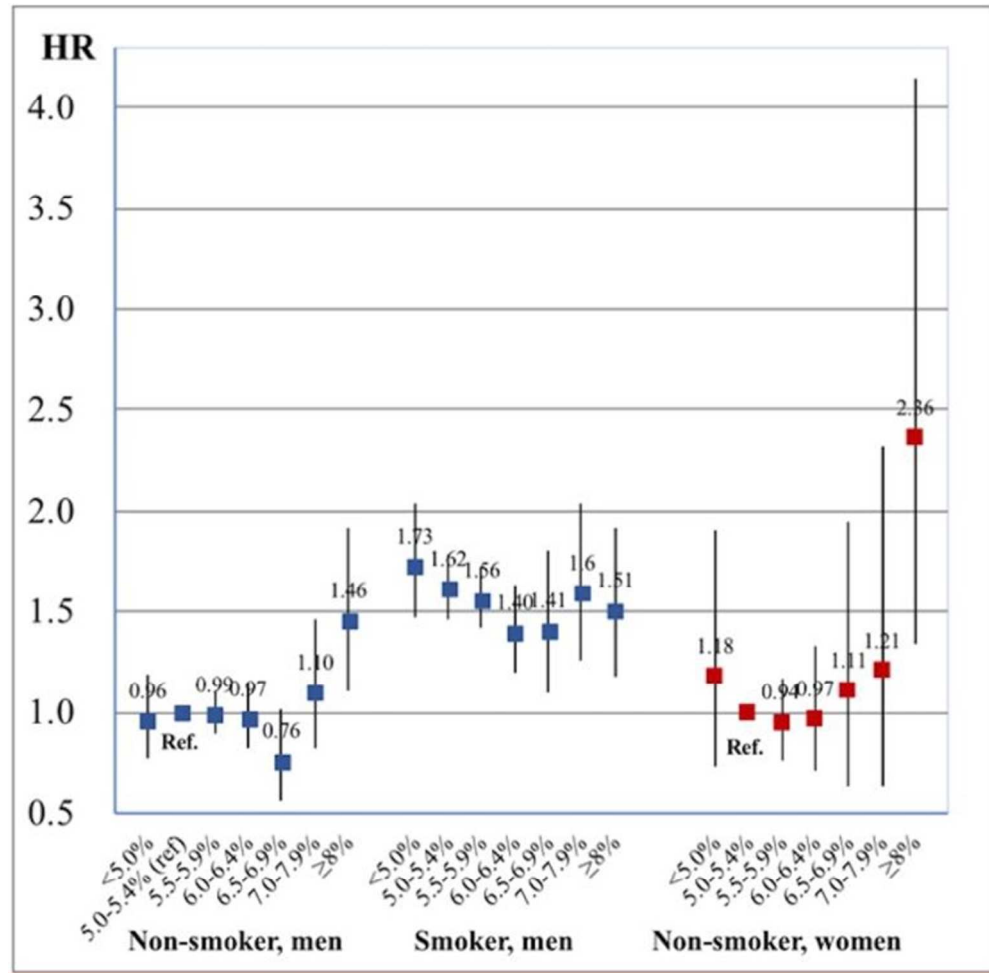

Fig1. The association between HbA1c and hearing impairment of high frequency stratified by smoking status.

Footnote; Results obtained by multivariable Cox regression. The reference value was 5.0-5.4% of HbA1c in non-smoker. The model was adjusted for age (year, continuous), sex, body mass index (<18.5, 18.5-22.9, 23-29.9, or  $\geq 30.0$  kg/m<sup>2</sup>), alcohol consumption (non-drinker, drinker consuming <1, 1 to < 2, or  $\geq 2$  go of Japanese sake contains approximately 23g of ethanol), walking time (<60, or  $\geq 60$  min/day), self-reported diabetes, hypertension (systolic blood pressure  $\geq 140$ mmHg, diastolic blood pressure  $\geq 90$  mmHg or receiving medication), and hyperlipidemia (triglyceride level  $\geq 150$ mg/dL, high-density lipoprotein cholesterol level <40 mg/dL or receiving medication).

203x197mm (96 x 96 DPI)

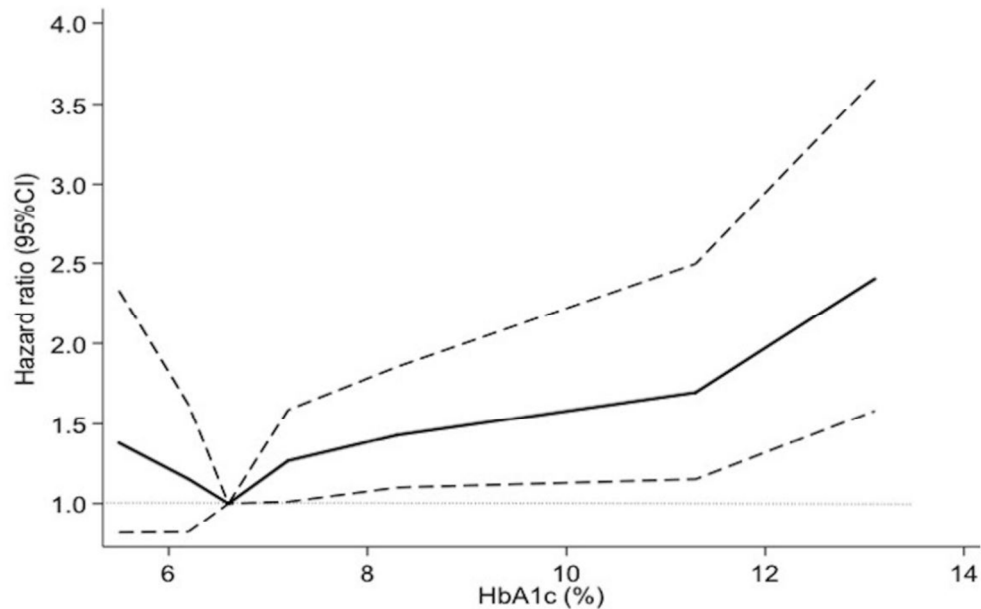

Fig 2. Adjusted hazard ratio of high frequency hearing impairment among participants with diabetes at baseline (n=10,154).

Footnote; Results obtained by multivariable Cox regression with restricted cubic splines with seven knots (p1, p5, p25, p50, p75, p95 and p99). The reference value was 6.6% (p25) of HbA1c. The continuous line presents hazard ratios and the dashed line presents 95% confidence intervals. The model was adjusted for age (year, continuous), sex, body mass index (<18.5, 18.5-22.9, 23-29.9, or  $\geq 30.0$  kg/m<sup>2</sup>), smoking status (non-smoker, smoker consuming  $\leq 20$ , or  $> 20$  cigarettes per day), alcohol consumption (non-drinker, drinker consuming <1, 1 to < 2, or  $\geq 2$  go of Japanese sake contains approximately 23g of ethanol), walking time (<60, or  $\geq 60$  min/day), hypertension (systolic blood pressure  $\geq 140$ mmHg, diastolic blood pressure  $\geq 90$  mmHg or receiving medication), and hyperlipidemia (triglyceride level  $\geq 150$ mg/dL, high-density lipoprotein cholesterol level <40 mg/dL in men and <50 mg/dL in women or receiving medication).

312x193mm (96 x 96 DPI)

Appendix 1. The association between baseline HbA<sub>1c</sub> and Incidence of high frequency hearing impairment (n=126,823).

|              |             | HbA <sub>1c</sub> (%) (mmol/mol) |                 |                     |                     |                     |                     |                     | P for quadratic |
|--------------|-------------|----------------------------------|-----------------|---------------------|---------------------|---------------------|---------------------|---------------------|-----------------|
|              |             | <5.0 (<31)                       | 5.0-5.4 (31-36) | 5.5-5.9 (37-41)     | 6.0-6.4 (42-46)     | 6.5-6.9 (48-52)     | 7.0-7.9 (53-63)     | ≥8 (≥64)            |                 |
| <b>Men</b>   | Person-year | 44,265                           | 227,740         | 215,647             | 36,368              | 9,184               | 8,148               | 8,888               |                 |
|              | No.cases    | 229                              | 1,345           | 1,535               | 329                 | 91                  | 99                  | 100                 |                 |
|              | non-smoker  | 0.94 (0.73 to 1.20)              | 1.00            | 0.93 (0.82 to 1.05) | 0.89 (0.73 to 1.07) | 0.68 (0.48 to 0.96) | 1.10 (0.80 to 1.53) | 1.37 (1.00 to 1.88) | 0.01            |
|              | smoker      | 1.06 (0.89 to 1.26)              | 1.00            | 0.95 (0.86 to 1.05) | 0.91 (0.77 to 1.07) | 1.00 (0.76 to 1.31) | 1.10 (0.84 to 1.44) | 1.04 (0.79 to 1.37) | 0.23            |
| <b>Women</b> | Person-year | 22,749                           | 110,979         | 114,327             | 19,601              | 3,143               | 2,062               | 1,813               |                 |
|              | No.cases    | 19                               | 140             | 214                 | 48                  | 15                  | 11                  | 13                  |                 |
|              | non-smoker  | 1.11 (0.65 to 1.91)              | 1.00            | 0.92 (0.72 to 1.18) | 0.88 (0.61 to 1.26) | 1.28 (0.69 to 2.35) | 1.47 (0.73 to 2.94) | 2.83 (1.53 to 5.24) | 0.005           |

Adjusted for age, walking time, alcohol consumption, self-reported diabetes, BMI, hypertension, hyperlipidemia and job type.

1

## STROBE Statement—checklist of items that should be included in reports of observational studies

|                           | Item No | Recommendation                                                                                                                                                                                                                                                                                                                                                                                                                                                                                                                                                                                                                                                                                   | Page number                            |
|---------------------------|---------|--------------------------------------------------------------------------------------------------------------------------------------------------------------------------------------------------------------------------------------------------------------------------------------------------------------------------------------------------------------------------------------------------------------------------------------------------------------------------------------------------------------------------------------------------------------------------------------------------------------------------------------------------------------------------------------------------|----------------------------------------|
| <b>Title and abstract</b> | 1       | (a) Indicate the study's design with a commonly used term in the title or the abstract<br>(b) Provide in the abstract an informative and balanced summary of what was done and what was found                                                                                                                                                                                                                                                                                                                                                                                                                                                                                                    | P1<br>Line1<br>P3 Line31,<br>P4 Line51 |
| <b>Introduction</b>       |         |                                                                                                                                                                                                                                                                                                                                                                                                                                                                                                                                                                                                                                                                                                  |                                        |
| Background/rationale      | 2       | Explain the scientific background and rationale for the investigation being reported                                                                                                                                                                                                                                                                                                                                                                                                                                                                                                                                                                                                             | P5 Line64-79                           |
| Objectives                | 3       | State specific objectives, including any prespecified hypotheses                                                                                                                                                                                                                                                                                                                                                                                                                                                                                                                                                                                                                                 | P6 Line83-88                           |
| <b>Methods</b>            |         |                                                                                                                                                                                                                                                                                                                                                                                                                                                                                                                                                                                                                                                                                                  |                                        |
| Study design              | 4       | Present key elements of study design early in the paper                                                                                                                                                                                                                                                                                                                                                                                                                                                                                                                                                                                                                                          | P7 Line90                              |
| Setting                   | 5       | Describe the setting, locations, and relevant dates, including periods of recruitment, exposure, follow-up, and data collection                                                                                                                                                                                                                                                                                                                                                                                                                                                                                                                                                                  | P7 Line90-107                          |
| Participants              | 6       | (a) <i>Cohort study</i> —Give the eligibility criteria, and the sources and methods of selection of participants. Describe methods of follow-up<br><i>Case-control study</i> —Give the eligibility criteria, and the sources and methods of case ascertainment and control selection. Give the rationale for the choice of cases and controls<br><i>Cross-sectional study</i> —Give the eligibility criteria, and the sources and methods of selection of participants<br>(b) <i>Cohort study</i> —For matched studies, give matching criteria and number of exposed and unexposed<br><i>Case-control study</i> —For matched studies, give matching criteria and the number of controls per case | P7 Line99-108                          |
| Variables                 | 7       | Clearly define all outcomes, exposures, predictors, potential confounders, and effect modifiers. Give diagnostic criteria, if applicable                                                                                                                                                                                                                                                                                                                                                                                                                                                                                                                                                         | P8<br>Line118-155                      |
| Data sources/measurement  | 8*      | For each variable of interest, give sources of data and details of methods of assessment (measurement). Describe comparability of assessment methods if there is more than one group                                                                                                                                                                                                                                                                                                                                                                                                                                                                                                             | P9<br>Line143-153                      |
| Bias                      | 9       | Describe any efforts to address potential sources of bias                                                                                                                                                                                                                                                                                                                                                                                                                                                                                                                                                                                                                                        | P15<br>Line271-278,<br>Line282         |
| Study size                | 10      | Explain how the study size was arrived at                                                                                                                                                                                                                                                                                                                                                                                                                                                                                                                                                                                                                                                        |                                        |
| Quantitative variables    | 11      | Explain how quantitative variables were handled in the analyses. If applicable, describe which groupings were chosen and why                                                                                                                                                                                                                                                                                                                                                                                                                                                                                                                                                                     | P9<br>Line127-143                      |
| Statistical methods       | 12      | (a) Describe all statistical methods, including those used to control for confounding<br>(b) Describe any methods used to examine subgroups and interactions                                                                                                                                                                                                                                                                                                                                                                                                                                                                                                                                     | P10<br>Line157-193<br>P11<br>Line173-  |

1  
2  
3  
4  
5  
6  
7  
8  
9  
10  
11  
12  
13  
14  
15  
16  
17  
18  
19  
20  
21  
22  
23  
24  
25  
26  
27  
28  
29  
30  
31  
32  
33  
34  
35  
36  
37  
38  
39  
40  
41  
42  
43  
44  
45  
46  
47  
48  
49  
50  
51  
52  
53  
54  
55  
56  
57  
58  
59  
60

184

---

(c) Explain how missing data were addressed

P7

Line105-

107

---

(d) *Cohort study*—If applicable, explain how loss to follow-up was addressed

*Case-control study*—If applicable, explain how matching of cases and controls was addressed

*Cross-sectional study*—If applicable, describe analytical methods taking account of sampling strategy

---

(e) Describe any sensitivity analyses

P12

Line185-

187

Continued on next page

For peer review only

1  
2  
3  
4  
5  
6  
7  
8  
9  
10  
11  
12  
13  
14  
15  
16  
17  
18  
19  
20  
21  
22  
23  
24  
25  
26  
27  
28  
29  
30  
31  
32  
33  
34  
35  
36  
37  
38  
39  
40  
41  
42  
43  
44  
45  
46  
47  
48  
49  
50  
51  
52  
53  
54  
55  
56  
57  
58  
59  
60

| <b>Results</b>    |     |                                                                                                                                                                                                              |                               |
|-------------------|-----|--------------------------------------------------------------------------------------------------------------------------------------------------------------------------------------------------------------|-------------------------------|
| Participants      | 13* | (a) Report numbers of individuals at each stage of study—eg numbers potentially eligible, examined for eligibility, confirmed eligible, included in the study, completing follow-up, and analysed            | Table1,2,<br>Fig2             |
|                   |     | (b) Give reasons for non-participation at each stage                                                                                                                                                         | P11<br>Line178                |
|                   |     | (c) Consider use of a flow diagram                                                                                                                                                                           |                               |
| Descriptive data  | 14* | (a) Give characteristics of study participants (eg demographic, clinical, social) and information on exposures and potential confounders                                                                     | P12<br>Line196-200,<br>Table1 |
|                   |     | (b) Indicate number of participants with missing data for each variable of interest                                                                                                                          | P7<br>Line1001-109            |
|                   |     | (c) <i>Cohort study</i> —Summarise follow-up time (eg, average and total amount)                                                                                                                             | P12<br>Line201-206            |
| Outcome data      | 15* | <i>Cohort study</i> —Report numbers of outcome events or summary measures over time                                                                                                                          | P12<br>Line200-206            |
|                   |     | <i>Case-control study</i> —Report numbers in each exposure category, or summary measures of exposure                                                                                                         |                               |
|                   |     | <i>Cross-sectional study</i> —Report numbers of outcome events or summary measures                                                                                                                           |                               |
| Main results      | 16  | (a) Give unadjusted estimates and, if applicable, confounder-adjusted estimates and their precision (eg, 95% confidence interval). Make clear which confounders were adjusted for and why they were included | P13<br>Line215                |
|                   |     | (b) Report category boundaries when continuous variables were categorized                                                                                                                                    | P10<br>Line158-161            |
|                   |     | (c) If relevant, consider translating estimates of relative risk into absolute risk for a meaningful time period                                                                                             |                               |
| Other analyses    | 17  | Report other analyses done—eg analyses of subgroups and interactions, and sensitivity analyses                                                                                                               | P14<br>Line218-223            |
| <b>Discussion</b> |     |                                                                                                                                                                                                              |                               |
| Key results       | 18  | Summarise key results with reference to study objectives                                                                                                                                                     | P14<br>Line225-231            |
| Limitations       | 19  | Discuss limitations of the study, taking into account sources of potential bias or imprecision. Discuss both direction and magnitude of any potential bias                                                   | P17<br>Line271-284            |
| Interpretation    | 20  | Give a cautious overall interpretation of results considering objectives, limitations, multiplicity of analyses, results from similar studies, and other relevant evidence                                   | P17<br>Line285-290            |
| Generalisability  | 21  | Discuss the generalisability (external validity) of the study results                                                                                                                                        | P17<br>Line284-               |

---

**Other information**


---

|         |    |                                                                                                                                                               |                |
|---------|----|---------------------------------------------------------------------------------------------------------------------------------------------------------------|----------------|
| Funding | 22 | Give the source of funding and the role of the funders for the present study and, if applicable, for the original study on which the present article is based | P18<br>Line301 |
|---------|----|---------------------------------------------------------------------------------------------------------------------------------------------------------------|----------------|

\*Give information separately for cases and controls in case-control studies and, if applicable, for exposed and unexposed groups in cohort and cross-sectional studies.

**Note:** An Explanation and Elaboration article discusses each checklist item and gives methodological background and published examples of transparent reporting. The STROBE checklist is best used in conjunction with this article (freely available on the Web sites of PLoS Medicine at <http://www.plosmedicine.org/>, Annals of Internal Medicine at <http://www.annals.org/>, and Epidemiology at <http://www.epidem.com/>). Information on the STROBE Initiative is available at [www.strobe-statement.org](http://www.strobe-statement.org).



# BMJ Open

## Hemoglobin A1c and Hearing Impairment: longitudinal analysis using a large occupational health check-up data of Japan

|                                 |                                                                                                                                                                                                                                                                                                                                                                                                                                                                                                                                                                                                                                                                                                                                                                                                                                                                                                                                                                                                                                                                                                                                                                                                                                                                                                                                                                                                                                                                                                                                                                                                                                                                                                                                               |
|---------------------------------|-----------------------------------------------------------------------------------------------------------------------------------------------------------------------------------------------------------------------------------------------------------------------------------------------------------------------------------------------------------------------------------------------------------------------------------------------------------------------------------------------------------------------------------------------------------------------------------------------------------------------------------------------------------------------------------------------------------------------------------------------------------------------------------------------------------------------------------------------------------------------------------------------------------------------------------------------------------------------------------------------------------------------------------------------------------------------------------------------------------------------------------------------------------------------------------------------------------------------------------------------------------------------------------------------------------------------------------------------------------------------------------------------------------------------------------------------------------------------------------------------------------------------------------------------------------------------------------------------------------------------------------------------------------------------------------------------------------------------------------------------|
| Journal:                        | <i>BMJ Open</i>                                                                                                                                                                                                                                                                                                                                                                                                                                                                                                                                                                                                                                                                                                                                                                                                                                                                                                                                                                                                                                                                                                                                                                                                                                                                                                                                                                                                                                                                                                                                                                                                                                                                                                                               |
| Manuscript ID                   | bmjopen-2018-023220.R2                                                                                                                                                                                                                                                                                                                                                                                                                                                                                                                                                                                                                                                                                                                                                                                                                                                                                                                                                                                                                                                                                                                                                                                                                                                                                                                                                                                                                                                                                                                                                                                                                                                                                                                        |
| Article Type:                   | Research                                                                                                                                                                                                                                                                                                                                                                                                                                                                                                                                                                                                                                                                                                                                                                                                                                                                                                                                                                                                                                                                                                                                                                                                                                                                                                                                                                                                                                                                                                                                                                                                                                                                                                                                      |
| Date Submitted by the Author:   | 31-Jul-2018                                                                                                                                                                                                                                                                                                                                                                                                                                                                                                                                                                                                                                                                                                                                                                                                                                                                                                                                                                                                                                                                                                                                                                                                                                                                                                                                                                                                                                                                                                                                                                                                                                                                                                                                   |
| Complete List of Authors:       | Nagahama, Satsue; Toho University Graduate School of Medicine, Department of Environmental and Occupational Health; All Japan Labor Welfare Foundation, Division of Occupational Health and Promotion<br>Kashino, Ikuko; National Center for Global Health and Medicine, Department of Epidemiology and Prevention, Center for Clinical Sciences<br>Hu, Huanhuan; National Center for Global Health and Medicine, Department of Epidemiology and Prevention, Center for Clinical Sciences<br>Nanri, Akiko; Fukuoka Women's University, Department of Food and Health Sciences International College of Arts and Sciences<br>Kurotani, Kayo; National Institutes of Biomedical Innovation, Health and Nutrition, National Institute of Health and Nutrition, Department of Nutritional Epidemiology and Shokuiku<br>Kuwahara, Keisuke; Teikyo University, Graduate School of Public Health; National Center for Global Health and Medicine, Department of Epidemiology and Prevention, Center for Clinical Sciences<br>Dan, Masashi; All Japan Labor Welfare Foundation,<br>Michikawa, Takehiro; National Institute for Environmental Studies, Environmental Epidemiology Section, Center for Environmental Health Sciences<br>Akter, Shamima; National Center for Global Health and Medicine, Department of Epidemiology and Prevention, Center for Clinical Sciences<br>Mizoue, Tetsuya; National Center for Global Health and Medicine, Department of Epidemiology and Prevention, Center for Clinical Sciences<br>Murakami, Yoshitaka ; Toho University Graduate School of Medicine, Department of Medical statistics<br>Nishiwaki, Yuji; Toho University Graduate School of Medicine, Department of Environmental and Occupational Health |
| <b>Primary Subject Heading</b>: | Epidemiology                                                                                                                                                                                                                                                                                                                                                                                                                                                                                                                                                                                                                                                                                                                                                                                                                                                                                                                                                                                                                                                                                                                                                                                                                                                                                                                                                                                                                                                                                                                                                                                                                                                                                                                                  |
| Secondary Subject Heading:      | Diabetes and endocrinology, Ear, nose and throat/otolaryngology, Epidemiology                                                                                                                                                                                                                                                                                                                                                                                                                                                                                                                                                                                                                                                                                                                                                                                                                                                                                                                                                                                                                                                                                                                                                                                                                                                                                                                                                                                                                                                                                                                                                                                                                                                                 |
| Keywords:                       | EPIDEMOLOGY, Diabetes & endocrinology < INTERNAL MEDICINE, OCCUPATIONAL & INDUSTRIAL MEDICINE, Audiology < OTOLARYNGOLOGY                                                                                                                                                                                                                                                                                                                                                                                                                                                                                                                                                                                                                                                                                                                                                                                                                                                                                                                                                                                                                                                                                                                                                                                                                                                                                                                                                                                                                                                                                                                                                                                                                     |
|                                 |                                                                                                                                                                                                                                                                                                                                                                                                                                                                                                                                                                                                                                                                                                                                                                                                                                                                                                                                                                                                                                                                                                                                                                                                                                                                                                                                                                                                                                                                                                                                                                                                                                                                                                                                               |

1  
2  
3  
4  
5  
6  
7  
8  
9  
10  
11  
12  
13  
14  
15  
16  
17  
18  
19  
20  
21  
22  
23  
24  
25  
26  
27  
28  
29  
30  
31  
32  
33  
34  
35  
36  
37  
38  
39  
40  
41  
42  
43  
44  
45  
46  
47  
48  
49  
50  
51  
52  
53  
54  
55  
56  
57  
58  
59  
60

SCHOLARONE™  
Manuscripts

For peer review only

1 **Hemoglobin A1c and Hearing Impairment: longitudinal analysis using a large**

2 **occupational health check-up data of Japan**

3  
4 Satsue Nagahama 1 2 3\*, Ikuko Kashino 3, Huanhuan Hu 3, Akiko Nanri 4, Kayo

5 Kurotani 5, Keisuke Kuwahara 6 3, Masashi Dan 2, Takehiro Michikawa 7, Shamima

6 Akter 3, Tetsuya Mizoue 3, Yoshitaka Murakami 8, Yuji Nishiwaki 1

7  
8 1 Toho University Graduate School of Medicine, Department of Environmental and

9 Occupational Health, 5-21-16, Omorinishi, Otaku, Tokyo, 143-8540, Japan. Phone

10 +81-3-3762-4151(2403), Fax +81-3-5493-5416

11 E-mail: [satsue-n@umin.ac.jp](mailto:satsue-n@umin.ac.jp)

12 ;

13 2 All Japan Labor Welfare Foundation, Division of Occupational Health and Promotion,

14 6-16-11, Hatanodai, Shinagawa, Tokyo, 142-0064, Japan;

15 3 National Center for Global Health and Medicine, Department of Epidemiology and

16 Prevention, Center for Clinical Sciences, 1-21-1, Toyama, Shinjuku, Tokyo, Japan;

17 4 Fukuoka Women's University, Department of Food and Health Sciences International

18 College of Arts and Sciences, 1-1-1, Kasumigaoka, Higashiku, Fukuoka, Japan;

- 1  
2  
3  
4  
5  
6 19 5 National Institutes of Biomedical Innovation, Health and Nutrition, National Institute  
7  
8  
9 20 of Health and Nutrition, Department of Nutritional Epidemiology and Shokuiku, 1-23-1,  
10  
11 21 Toyama, Shinjuku, Tokyo, Japan;  
12  
13  
14 22 6 Teikyo University, Graduate School of Public Health, 2-11-1, Kaga, Itabashi, Tokyo,  
15  
16  
17 23 Japan;  
18  
19  
20 24 7 Centre for Health and Environmental Risk Research, National Institute for  
21  
22  
23 25 Environmental Studies, Environmental Epidemiology Section, 16-2, Onogawa,  
24  
25  
26 26 Tsukubashi, Ibaraki, Japan;  
27  
28  
29 27 8 Toho University Graduate School of Medicine, Department of Medical statistics,  
30  
31 28 5-21-16, Omorinishi, Otaku, Tokyo, Japan;  
32  
33  
34 29 \*Correspondence to S. Nagahama.  
35  
36

37 30

38  
39 31 Word count 3,091

40  
41  
42 32 Tables 2

43  
44  
45 33 Figures 2  
46  
47  
48  
49  
50  
51  
52  
53  
54  
55  
56  
57  
58  
59  
60

1  
2  
3  
4  
5  
6 34 **Objectives** The aim of this study was to determine whether hemoglobin A1c (HbA1c)  
7  
8 35 level is associated with the incidence of hearing impairment accounting for smoking  
9  
10  
11 36 status and diabetic condition at baseline.

12  
13  
14 37 **Methods** Participants were 131,689 men and 71,286 women aged 30-65 years and free  
15  
16  
17 38 of hearing impairment at baseline (2008) who attended Japanese occupational annual  
18  
19  
20 39 health check-ups from 2008 to 2015. We defined low frequency hearing impairment at a  
21  
22  
23 40 hearing threshold >30 dB at 1 kHz and high frequency at >40 dB at 4 kHz in the better  
24  
25  
26 41 ear in pure-tone audiometric tests. HbA1c was categorized into 7 categories. The  
27  
28  
29 42 association between HbA1c and hearing impairment was assessed using the Cox  
30  
31  
32 43 proportional hazards model.

33  
34 44 **Results** On 5 years' mean follow-up, high HbA1c was associated with high frequency  
35  
36  
37 45 hearing impairment. In non-smokers, HbA1c  $\geq 8.0\%$  was associated with high frequency  
38  
39  
40 46 hearing impairment, with a multivariable hazard ratio (95% confidence interval)  
41  
42  
43 47 compared with HbA1c 5.0-5.4% of 1.46 (1.10-1.94) in men and 2.15 (1.13-4.10) in  
44  
45  
46 48 women. There was no significant association between HbA1c and hearing impairment  
47  
48  
49 49 in smokers. A J-shaped association between HbA1c and high frequency hearing  
50  
51  
52 50 impairment was observed for participants with diabetes at baseline. HbA1c was not  
53  
54  
55 51 associated

1  
2  
3  
4  
5  
6 52 with low frequency hearing impairment among any participants.  
7

8 53 **Conclusions** HbA1c  $\geq 8.0\%$  of non-smokers and  $\geq 7.3\%$  of participants with diabetes  
9  
10  
11 54 was associated with high frequency hearing impairment. These findings indicate that  
12  
13  
14 55 appropriate glycemic control may prevent diabetic-related hearing impairment.  
15  
16

17 56

18  
19  
20 57 **Strengths and limitations of this study**  
21

22  
23 58 ▪ This study included a large number of participants, accounting for gender and smoking  
24  
25 59 status.  
26

27  
28 60 ▪ A median follow-up period was 5 years.  
29

30  
31 61 ▪ This study findings are limited to workers in Japan.  
32

33  
34 62 ▪ We investigated whether HbA1c was associated with hearing impairment among  
35  
36 63 participants with diabetes at baseline.  
37

38  
39 64 ▪ Information on noise exposure, ototoxic drug use, ear surgery, and ear infection was  
40  
41 65 not obtained.  
42  
43  
44  
45  
46  
47  
48  
49  
50  
51  
52  
53  
54  
55  
56  
57

1  
2  
3  
4  
5  
6 **66 BACKGROUND**

7  
8  
9 **67** Patients with hearing impairment experience a range of complications, including  
10  
11 **68** impaired quality of life, dementia, depression, loneliness, poor self-esteem and  
12  
13  
14 **69** functional disability (1-4). These complications have made this condition a social and  
15  
16  
17 **70** economic problem worldwide. More than 5% of the world population has hearing  
18  
19  
20 **71** impairment, and this is expected to increase with the aging of the population (5).  
21  
22  
23 **72** Although this bleak picture points to the importance of identifying preventable risk  
24  
25  
26 **73** factors for hearing impairment, such studies are in fact scarce.  
27  
28  
29 **74** Emerging evidence suggests that diabetes mellitus may be a risk factor for hearing  
30  
31  
32 **75** impairment. Meta-analyses of 13 cross-sectional studies showed that subjects with  
33  
34  
35 **76** diabetes had a 2-fold-increased risk of developing hearing impairment (odds ratio 2.15,  
36  
37  
38 **77** 95%CI 1.72-2.68) (6). Diabetic hearing impairment is hypothesized to be due to  
39  
40  
41 **78** microvascular complications (7, 8). Diabetic hearing impairment may thus be prevented  
42  
43  
44 **79** by appropriate glycaemic control, which has been shown to be effective for other  
45  
46  
47 **80** microvascular complications of diabetes, such as retinopathy, nephropathy and  
48  
49  
50 **81** neuropathy (9-12). Three studies have reported the association between hearing  
51  
52  
53 **82** impairment and hemoglobin A1c (HbA1c), an indicator for glycaemic control (13-15).  
54  
55  
56 **83** One of these reported a positive dose-relationship between HbA1c and hearing

1  
2  
3  
4  
5  
6 84 impairment as defined using a pure-tone average threshold of mainly low frequencies  
7  
8  
9 85 (15), while the other two reported that HbA1c was positively associated with high  
10  
11 86 frequency hearing impairment (13, 14). Nevertheless, no study has yet reported the  
12  
13  
14 87 precise shape of the dose-relationship between HbA1c and high frequency hearing  
15  
16  
17 88 impairment. Furthermore, no study has yet investigated whether HbA1c is associated  
18  
19  
20 89 with hearing impairment among those with diabetes.  
21  
22  
23 90 In Japan, a pure-tone audiometric test is mandatory in annual occupational health  
24  
25  
26 91 check-ups (16). The large sample size this affords has enabled us to investigate the  
27  
28  
29 92 dose-response relationship between HbA1c and hearing impairment, while accounting  
30  
31  
32 93 for well-known risk factors of hearing impairment such as gender and smoking (17, 18).  
33  
34 94 The present study had two aims. The first aim was to investigate the association  
35  
36  
37 95 between HbA1c and the incidence of hearing impairment using a large dataset from  
38  
39  
40 96 annual occupational health check-ups in Japan, accounting for gender and smoking  
41  
42  
43 97 status. The second aim was to determine whether HbA1c was associated with hearing  
44  
45  
46 98 impairment among participants with diabetes.

47  
48 99

## 50 51 100 **METHODS**

### 52 53 54 101 Study population



1  
2  
3  
4  
5  
6 102 The present study was conducted using data from annual health check-ups of Japanese  
7  
8  
9 103 workers. The All Japan Labor Welfare Foundation, a health service provider with  
10  
11 104 centers in Tokyo, Aomori, Nagano, Yamagata, Ibaraki, Gunma and Nagoya provided the  
12  
13  
14 105 data from April 2008 through Dec 2015, allowing a maximum of 7 years of follow-up.  
15  
16  
17 106 In Japan, annual health check-ups are mandatory for all employees and include a  
18  
19  
20 107 hearing test under the Industrial Safety and Health Act. Nearly all employees attend a  
21  
22  
23 108 health check-up every year. Participants were mainly Japanese employees but also  
24  
25  
26 109 included a small number of their dependents, employers and foreign workers.  
27  
28  
29 110 A total of 312,512 participants aged 30-65 years underwent a hearing test and HbA1c  
30  
31 111 test at baseline (between Apr 2008 and Mar 2009). Of these, we excluded participants  
32  
33  
34 112 with hearing impairment at baseline (n=51,489). Given that diabetic patients with  
35  
36  
37 113 complications may receive more intensive treatments, which may bias the association  
38  
39  
40 114 between HbA1c and hearing impairment, we excluded participants with cardiovascular  
41  
42  
43 115 disease and stroke (n=913). We further excluded participants who did not attend any  
44  
45  
46 116 subsequent health examinations or hearing tests (n=48,618). After further exclusion of  
47  
48  
49 117 8,517 participants with missing information on covariates (5,011 for smoking status,  
50  
51 118 5,152 for alcohol consumption, 1,815 for physical activity data, 5 for body mass index  
52  
53  
54 119 (BMI), 9 for hypertension and 9 for dyslipidemia data; some participants had missing

1  
2  
3  
4  
5  
6 120 data for more than one parameter), leaving 202,975 participants (131,689 men and  
7  
8  
9 121 71,286 women) for analysis.  
10  
11 122 Ethics  
12  
13  
14 123 We obtained written informed consent from each participant who attended the health  
15  
16  
17 124 check-up after April 2013. Before March 2013, we disclosed the purpose of our study  
18  
19  
20 125 by posters and the participants had the opportunity to refuse the use of their data for the  
21  
22  
23 126 study. This procedure conforms to the Japanese Ethical Guidelines for Medical and  
24  
25  
26 127 Health Research Involving Human Subjects, where the obtaining consent may be  
27  
28  
29 128 simplified for observational studies using existing data. The research protocol including  
30  
31  
32 129 consent procedure was approved by the Ethics Committee of the Faculty of Medicine,  
33  
34 130 Toho University (No. 25017 and No.A16130) and the Ethics Committee of the National  
35  
36  
37 131 Center for Global Health and Medicine (No. NCGM-G-001254-02).  
38  
39  
40 132 Ascertainment of hearing impairment  
41  
42  
43 133 Trained staff performed pure-tone air-conduction audiometry using an audiometer  
44  
45  
46 134 (AA-57, RION Inc., Tokyo, Japan). Low frequency hearing impairment was defined as  
47  
48  
49 135 failure to hear a pure-tone signal of 30dB at 1 kHz in the better ear, and high frequency  
50  
51  
52 136 hearing impairment as failure to hear a pure-tone signal of 40dB at 4 kHz in the better  
53  
54  
55 137 ear. These thresholds are recommended for use in annual health check-ups by Ministry  
56  
57  
58  
59  
60

1  
2  
3  
4  
5  
6 138 of Health, Labor and Welfare in Japan (16). Onset of hearing impairment was defined as  
7  
8  
9 139 the day of the health check-up on which hearing impairment was first detected.  
10  
11 140 Data collection and measurements at baseline (between Apr 2008 and Mar 2009)  
12  
13  
14 141 We used a self-administered questionnaire developed by the Ministry of Health, Labor  
15  
16  
17 142 and Welfare for a specific health examination, namely the national health checkup  
18  
19  
20 143 system focused on metabolic syndrome (19), to assess medical history, regular physical  
21  
22  
23 144 activity (walking time  $<60$  min/day or  $\geq 60$  min/day), smoking status (non-smoker, daily  
24  
25  
26 145 smoker  $\leq 20$  cigarettes/day or  $>20$  cigarettes/day), alcohol consumption (non-drinker,  $<1$   
27  
28  
29 146 *go*, 1 to  $<2$  *go* or  $\geq 2$  *go*/day; one *go* of sake, a traditional Japanese beverage, is equal to  
30  
31  
32 147 about 180 mL of 10-14% ethanol and contains about 23 g of ethanol) (20), and  
33  
34  
35 148 self-reported diabetes (treatments with anti-diabetic medication or a self-reported  
36  
37  
38 149 history of diabetes: yes or no). Job type was categorized as professional job,  
39  
40  
41 150 management, office job, sales, service, telegraph, manufacturing, transportation and  
42  
43  
44 151 other. Height was measured to the nearest 0.1 cm and weight to the nearest 0.1 kg. Body  
45  
46  
47 152 mass index (BMI) was calculated as the weight in kilograms divided by the square of  
48  
49  
50 153 height in metres and categorized into 4 groups ( $<18.5$ , 18.5-22.9, 23-29.9,  $\geq 30$  kg/m<sup>2</sup>).  
51  
52  
53 154 Blood pressure was measured in the sitting position using an automated  
54  
55  
56 155 sphygmomanometer (HEM-907, Omron, Kyoto, Japan). Participants with high blood

1  
2  
3  
4  
5  
6 156 pressure ( $\geq 130$  mmHg systolic or  $\geq 85$  mmHg diastolic) received a second measurement  
7  
8  
9 157 and the average was used for the analysis. Hypertension was defined by  $\geq 140$  mmHg  
10  
11 158 systolic,  $\geq 90$  mmHg diastolic or the use of medication for hypertension. A venous blood  
12  
13  
14 159 sample was collected and stored in a cooler at 4 °C for transportation to an external  
15  
16  
17 160 laboratory (SRL, Tokyo, Japan). Triglyceride level was measured using an enzymatic  
18  
19  
20 161 colorimetric test and high-density lipoprotein cholesterol (HDL-C) was determined  
21  
22  
23 162 using a direct method. Dyslipidemia was defined by triglyceride  $\geq 150$  mg/dL (1.7  
24  
25  
26 163 mmol/L) in men and women, HDL-C  $< 40$  mg/dL (1.04 mmol/L) in men and  $< 50$  mg/dL  
27  
28  
29 164 (1.3 mmol/L) in women or use of medication for dyslipidemia. HbA1c was measured by  
30  
31 165 latex agglutination turbidimetry and converted to the National Glycohemoglobin  
32  
33  
34 166 Standardization Program equivalent value (%) using the formula below, according to the  
35  
36  
37 167 Japan Diabetes Society statement (21) :  
38  
39  
40 168  $\text{HbA1c (\%)} = 1.02 \times \text{HbA1c (Japan Diabetes Society) (\%)} + 0.25\%$   
41  
42  
43 169 Diabetes was defined as  $\text{FPG} \geq 126$  mg/dL,  $\text{HbA1c} \geq 6.5\%$ , or self-reported diabetes.  
44  
45  
46 170 Statistical analysis  
47  
48  
49 171 Participants were divided into 7 groups according to their HbA1c level at baseline  
50  
51 172 [ $< 5.0\%$  (31 mmol/mol), 5.0-5.4% (31-36 mmol/mol), 5.5-5.9% (37-41 mmol/mol),  
52  
53  
54 173 6.0-6.4% (42-46 mmol/mol), 6.5-6.9% (48-52 mmol/mol), 7.0-7.9% (53-63 mmol/mol),  
55  
56  
57  
58  
59  
60

1  
2  
3  
4  
5  
6 174  $\geq 8.0\%$  (64 mmol/mol)]. The HbA1c group specific baseline characteristics of  
7  
8  
9 175 participants were described as means (SD) for continuous variables and percentages for  
10  
11  
12 176 categorical variables. Person-years was calculated from baseline to the onset of hearing  
13  
14  
15 177 impairment, or the date of the last health check-up through Dec 2015 (whichever  
16  
17  
18 178 occurred first). Crude incident rates of hearing impairment were shown in events per  
19  
20  
21 179 1000 person-years. Survival analyses were performed using Cox regression to estimate  
22  
23  
24 180 the hazard ratio (HR) with 95% confidence interval (CI) for the incidence of hearing  
25  
26  
27 181 impairment across HbA1c categories, with 5.0-5.4% (31-36mmol/mol) as the reference  
28  
29  
30 182 value. The analyses were stratified by sex because the interaction between hearing  
31  
32  
33 183 impairments and sex was significant ( $p$  for interaction  $<0.001$ ). Age-adjusted model  
34  
35  
36 184 (model 1) and multiple-adjusted model (model 2), which included alcohol consumption,  
37  
38  
39 185 physical activity, BMI, hypertension, dyslipidemia, self-reported diabetes and smoking  
40  
41  
42 186 status were used for the analysis. Although smoking status itself was related to hearing  
43  
44  
45 187 impairment in this study, the association between HbA1c and hearing impairment  
46  
47  
48 188 differed according to smoking status ( $p$  for interaction  $<0.001$ ). We therefore  
49  
50  
51 189 additionally performed analyses according to combined HbA1c (7 groups) and smoking  
52  
53  
54 190 status (non-smoker and current smoker), by considering HbA1c 5.0-5.4%  
55  
56  
57 191 (31-36mmol/mol) and non-smoker as the reference category. We did not analyze

1  
2  
3  
4  
5  
6 192 women's smokers because of the small number of cases. To assess whether control of  
7  
8  
9 193 HbA1c would reduce the incidence of hearing impairment in those with diabetes, we  
10  
11 194 elucidated the shape of the relationship between HbA1c and high frequency hearing  
12  
13  
14 195 impairment among those with diabetes. We fitted restricted cubic splines models with  
15  
16  
17 196 seven knots placed at the 1th, 5th, 25th, 50th, 75th, 95th, and 99th centiles as reference  
18  
19  
20 197 values of HbA1c 6.6% (25th) (22). The HRs were adjusted for alcohol consumption,  
21  
22  
23 198 physical activity, BMI, hypertension, dyslipidemia and smoking status. As a sensitivity  
24  
25  
26 199 analysis, we further adjusted for job type in the main analyses (model 2) among  
27  
28  
29 200 participants with this information (n=126,823). We tested the proportional hazards  
30  
31  
32 201 assumption using Schoenfeld residuals. We found no significant deviations for any  
33  
34  
35 202 covariate. P value of two-tailed test <0.05 was considered statistically significant. Trend  
36  
37  
38 203 association was assessed by assigning ordinal numbers (0–6) to the HbA1c categories.  
39  
40  
41 204 We calculated the p for the quadratic trend because it was a better fit for the data than  
42  
43  
44 205 the simple linear model. All statistical analyses were performed using Stata version 12.1  
45  
46  
47 206 (StataCorp, College Station, Texas, USA).

#### 207 Patient and public involvement

208 No patient were involved in setting the research question or the outcome measures,  
209 planning for the design of the study

1  
2  
3  
4  
5  
6 210 **RESULTS**

7  
8 211 Baseline characteristics by category of HbA1c are shown in Table 1. The mean age of  
9  
10 212 participants was 45 years for men and 47 years for women. Participants who had higher  
11  
12 213 HbA1c tended to be non-drinkers and to have higher BMI, hypertension, and  
13  
14 214 dyslipidemia in both men and women. Male participants with higher HbA1c tended to  
15  
16 215 be smokers consuming > 20 cigarettes per day.

17  
18 216 In men, 4,621 developed high frequency hearing impairment with 661,937 person-years  
19  
20 217 (mean duration of follow-up was 5.0 years) and 1,311 developed low frequency hearing  
21  
22 218 impairment with 670,153 person-years (5.1 years). In women, 582 developed high  
23  
24 219 frequency hearing impairment with 345,312 person-years (4.8 years) and 1,207  
25  
26 220 developed low frequency hearing impairment with 344,057 person-years (4.8 years).

27  
28 221 Table 2 shows the association between HbA1c and the incidence of hearing impairment.  
29  
30 222 In the multivariable-adjusted model, HbA1c showed a quadratic trend with the  
31  
32 223 incidence of high frequency hearing impairment in men (p for quadratic=0.007), and a  
33  
34 224 statistically marginal association in women (p for quadratic=0.08). HbA1c was not  
35  
36 225 associated with low frequency hearing impairment. Figure 1 shows the association  
37  
38 226 between HbA1c and high frequency hearing impairment with accounting for smoking  
39  
40 227 status [the interaction between HbA1c and smoking status (p for interaction <0.001)].  
41  
42  
43  
44  
45  
46  
47  
48  
49  
50  
51  
52  
53  
54  
55  
56  
57  
58  
59  
60

1  
2  
3  
4  
5  
6 228 Compared to non-smokers with HbA1c 5.0-5.4% (31-36mmol/mol), non-smokers with  
7  
8  
9 229 HbA1c  $\geq$ 8.0% (64 mmol/mol) showed an association with hearing impairment [HR  
10  
11 230 (95%CI) of 1.46 (1.11-1.92) in men and 2.36 (1.34-4.15) in women]. Although smokers  
12  
13  
14 231 had higher HRs of hearing impairment than non-smokers, HbA1c level was not  
15  
16  
17 232 associated with hearing impairment among smokers. Additional adjustments for job  
18  
19  
20 233 type did not affect the results (Appendix 1).

21  
22  
23 234 Figure 2 shows the spline regression model of high frequency hearing impairment at  
24  
25  
26 235 various HbA1c levels against a reference HbA1c level of 6.6% in participants with  
27  
28  
29 236 diabetes at baseline (n=10,154). The relationship between HbA1c and the incidence of  
30  
31  
32 237 hearing impairment was J-shaped, with the significant increase of HR for HbA1c $\geq$ 7.2%.

33  
34 238

## 35 36 37 239 **DISCUSSION**

38  
39  
40 240 In this study, we found a quadratic trend between HbA1c and the incidence of  
41  
42  
43 241 high frequency hearing impairment. In particular, HbA1c concentrations over 8.0% (64  
44  
45  
46 242 mmol/mol) were associated with high frequency hearing impairment among  
47  
48  
49 243 non-smokers. A J-shaped association between HbA1c and high frequency hearing  
50  
51  
52 244 impairment was observed among participants with diabetes at baseline. Our findings



1  
2  
3  
4  
5  
6 245 indicate that appropriate glycemic control may prevent the incidence of diabetic hearing  
7  
8  
9 246 impairment.

10  
11 247 Our finding of a quadratic trend between HbA1c and hearing impairment is  
12  
13  
14 248 supported by the results of two longitudinal studies. (13, 15) One of these reported an  
15  
16  
17 249 odds ratio (95% CI) of high frequency hearing impairment per 1.0% increase in HbA1c  
18  
19  
20 250 of 1.52 (1.03 to 2.23), albeit no statistical association between the three categories of  
21  
22  
23 251 HbA1c and high frequency hearing impairment (13). The second reported that HbA1c  
24  
25  
26 252 was positively associated with average hearing threshold, mainly among low  
27  
28  
29 253 frequencies (15). The present study provides novel evidence that an HbA1c of 8.0% (64  
30  
31 254 mmol/mol) or above is associated with increased risk of high frequency hearing  
32  
33  
34 255 impairment in non-smokers. Our findings are consistent with the work of Cruickshanks  
35  
36  
37 256 et al., who reported that poor glycemic control, defined by a glycosylated hemoglobin  
38  
39  
40 257 level, was associated with hearing impairment (23).

41  
42 258 Additionally, we found that the J-shaped association between HbA1c and  
43  
44  
45 259 hearing impairment remained even among participants with diabetes at baseline. This  
46  
47  
48 260 result suggests that proper glycemic control may prevent diabetic-related hearing  
49  
50  
51 261 impairment even in those with diabetes. Previous studies have also reported a J-shaped  
52  
53  
54 262 association between HbA1c and diabetics complications, and noted that hypoglycemia

1  
2  
3  
4  
5  
6 263 might increase diabetic complications (24-26). More research is needed to determine a  
7  
8  
9 264 suitable HbA1c level for glycaemic targeting to prevent hearing impairment in diabetic  
10  
11  
12 265 management.

13  
14 266 We found that high frequency hearing impairment has a quadratic trend with  
15  
16  
17 267 HbA1c among non-smokers but not smokers. Previous studies have reported an adverse  
18  
19  
20 268 effect of smoking cigarettes on hearing impairment (23, 27, 28). It is plausible that the  
21  
22  
23 269 effect of smoking cigarettes may be stronger than HbA1c and might mask the effect of  
24  
25  
26 270 HbA1c. Further research is needed to confirm the joint effect of smoking and HbA1c on  
27  
28  
29 271 hearing impairment.

30  
31 272 The pathophysiology underlying high-HbA1c-associated hearing impairment is  
32  
33  
34 273 unclear, which allows for speculation. One possible explanation is that  
35  
36  
37 274 hyperglycaemia-related microvascular complications lead to thickening of the cochlea  
38  
39  
40 275 and vestibulopathy, and result in hearing impairment (7, 8, 29-33). Diabetic-related  
41  
42  
43 276 hearing impairment has been mainly observed at high frequencies, suggesting that high  
44  
45  
46 277 frequency-specific areas of the cochlea may be more fragile to ischemic changes due to  
47  
48  
49 278 microvascular complications (34-38). This mechanism is supported by the J-shaped  
50  
51 279 association between HbA1c and hearing impairment observed in the present study, since  
52  
53  
54  
55  
56  
57  
58  
59  
60

1  
2  
3  
4  
5  
6 280 previous studies also reported a J-shaped-association between HbA1c and diabetic

7  
8  
9 281 vascular complications (39, 40). Further studies to confirm this idea are required.

10  
11 282 This study has several strengths. The large dataset allowed us to investigate the

12  
13  
14 283 association between HbA1c and hearing impairment with comprehensive adjustment for

15  
16  
17 284 covariates, and additionally, among participants with diabetes at baseline. Audiometry

18  
19  
20 285 to confirm hearing impairment was conducted by trained staff. Several limitations of the

21  
22  
23 286 study also need to be considered. First, though noise exposure is an important risk factor

24  
25  
26 287 on hearing impairment (41, 42), information on noise exposure was not available and

27  
28  
29 288 thus noise information was not considered in the analyses. The present study thus might

30  
31  
32 289 include the confounding influence of noise exposure. However, a previous study reported

33  
34  
35 290 that the relationship between diabetes and hearing impairment was independent of this

36  
37  
38 291 variable (37). Moreover, in the present study, HbA1c level was associated with hearing

39  
40  
41 292 impairment even after accounting for job type in a sensitivity analysis. Second,

42  
43  
44 293 information on ototoxic drug use, ear surgery, and ear infection was not collected, and

45  
46  
47 294 we were therefore unable to exclude cases of hearing impairment due to these factors.

48  
49  
50 295 Third, blood pressure was measured once, followed by a second measurement if the first

51  
52  
53 296 systolic blood pressure  $\geq 130$  mmHg systolic or diastolic blood pressure  $\geq 85$  mmHg. All

54  
55  
56 297 participants didn't have the same evaluation of blood pressure. This may lead to

1  
2  
3  
4  
5  
6 298 misclassification of hypertension. Fourth, we did not account for gender or smoking  
7  
8 299 status in the association between HbA1c and hearing impairment for participants with  
9  
10  
11 300 diabetes because of the small sample size. Fifth, the hearing test was only conducted at  
12  
13  
14 301 1 kHz and 4 kHz. Hearing impairment at other frequencies could not therefore be  
15  
16  
17 302 identified. Sixth, we cannot exclude the possibility of residual confounding and  
18  
19  
20 303 confounding by unmeasured variables. Finally, the study participants were mainly  
21  
22  
23 304 workers, and thus caution is required when generalizing our findings.  
24

## 25 305 **CONCLUSION**

26  
27  
28 306 We found the quadratic trend between HbA1c and the incidence of high  
29  
30  
31 307 frequency hearing impairment in non-smokers. The trend between HbA1c and hearing  
32  
33  
34 308 impairment remained even among those with diabetes. These findings indicate that  
35  
36  
37 309 diabetic-related hearing impairment may be prevented with appropriate glycemetic  
38  
39  
40 310 control. These findings warrant confirmation in interventional studies.  
41

## 42 311 Abbreviations

43  
44  
45 312 HbA1c: hemoglobin A1c; BMI: body mass index; HR: hazard ratio; CI: confidence  
46  
47  
48 313 interval  
49

## 50 314 Acknowledgements

51  
52  
53  
54  
55  
56  
57  
58  
59  
60

1  
2  
3  
4  
5  
6 315 The authors would like to thank Dr Nobuo Yanagisawa and Dr Takeshi Kawaguchi for  
7  
8  
9 316 coordinating the study.

10  
11 317 Contributors

12  
13  
14 318 SN, TaM and IK designed study and drafted the manuscript. SN, HHH, KaK, AN and  
15  
16  
17 319 KeK performed the data analysis. MD collected and interpreted the data. All authors  
18  
19  
20 320 participated in interpretation of the findings, revised the paper critically for important  
21  
22  
23 321 intellectual content and approved the final version to be published. YN and YM  
24  
25  
26 322 provided administrative, technical and material support. TM and SA revised the work  
27  
28  
29 323 critically for important intellectual content. SN and YN are guarantors.

30  
31 324 Funding

32  
33  
34 325 This research was funded by All Japan Labor Welfare Foundation Research Fellowship.

35  
36  
37 326 Competing interests

38  
39  
40 327 SN is occupational physicians in All Japan Labor Welfare Foundation. All Japan Labor  
41  
42  
43 328 Welfare Foundation had no role in the design, analysis or writing of this articles. All  
44  
45  
46 329 other authors declare no competing financial interests.

47  
48 330 Ethics approval

1  
2  
3  
4  
5  
6 331 The research protocol was approved by the Ethics Committee of the Faculty of  
7  
8 332 Medicine, Toho University and the Ethics Committee of the National Center for Global  
9  
10  
11 333 Health and Medicine.  
12  
13  
14 334 Data sharing statement  
15  
16  
17 335 No additional data are available.  
18  
19  
20 336

For peer review only

## 337 References

- 338 1. Lin FR, Metter EJ, O'Brien RJ, Resnick SM, Zonderman AB, Ferrucci L. Hearing  
339 loss and incident dementia. *Arch Neurol*. 2011;68(2):214-20.
- 340 2. Li CM, Zhang X, Hoffman HJ, Cotch MF, Themann CL, Wilson MR. Hearing  
341 impairment associated with depression in US adults, National Health and Nutrition  
342 Examination Survey 2005-2010. *JAMA Otolaryngol Head Neck Surg*.  
343 2014;140(4):293-302.
- 344 3. Herbst KG, Humphrey C. Hearing impairment and mental state in the elderly living  
345 at home. *Br Med J*. 1980;281(6245):903-5.
- 346 4. Wilson BS, Tucci DL, Merson MH, O'Donoghue GM. Global hearing health care:  
347 new findings and perspectives. *Lancet*. 2017;390(10111):2503-15.
- 348 5. WHO [Internet]. Deafness and hearing loss.  
349 <http://www.who.int/mediacentre/factsheets/fs300/en>. Accessed 11 Jan 2018.
- 350 6. Horikawa C, Kodama S, Tanaka S, Fujihara K, Hirasawa R, Yachi Y, et al. Diabetes  
351 and risk of hearing impairment in adults: a meta-analysis. *J Clin Endocrinol Metab*.  
352 2013;98(1):51-8.

- 1  
2  
3  
4  
5  
6 353 7. Fukushima H, Cureoglu S, Schachern PA, Paparella MM, Harada T, Oktay MF.  
7  
8 354 Effects of type 2 diabetes mellitus on cochlear structure in humans. *Arch Otolaryngol*  
9  
10  
11 355 *Head Neck Surg.* 2006;132(9):934-8.  
12  
13  
14 356 8. Oron Y, Elgart K, Marom T, Roth Y. Cardiovascular risk factors as causes for hearing  
15  
16  
17 357 impairment. *Audiol Neurootol.* 2014;19(4):256-60.  
18  
19  
20 358 9. Klein R, Klein BE, Moss SE. Relation of glycemic control to diabetic microvascular  
21  
22  
23 359 complications in diabetes mellitus. *Ann Intern Med.* 1996;124(1 Pt 2):90-6.  
24  
25  
26 360 10. Danne T, Weber B, Dinesen B, Mortensen HB. Threshold of HbA1c for the effect of  
27  
28  
29 361 hyperglycemia on the risk of diabetic microangiopathy. *Diabetes Care.* 1996;19(2):183.  
30  
31  
32 362 11. Li W, Katzmarzyk PT, Horswell R, Wang Y, Johnson J, Hu G. HbA1c and all-cause  
33  
34  
35 363 mortality risk among patients with type 2 diabetes. *Int J Cardiol.* 2016;202:490-6.  
36  
37  
38 364 12. 5. Glycemic Targets. *Diabetes Care.* 2016;39 Suppl 1:S39-46.  
39  
40  
41 365 13. Michikawa T, Mizutari K, Saito H, Takebayashi T, Nishiwaki Y. Glycosylated  
42  
43  
44 366 hemoglobin level is associated with hearing impairment in older Japanese: the  
45  
46  
47 367 Kurabuchi Study. *J Am Geriatr Soc.* 2014;62(7):1231-7.  
48  
49  
50 368 14. Kang SH, Jung DJ, Cho KH, Park JW, Lee KY, Do JY. Association Between HbA1c  
51  
52  
53 369 Level and Hearing Impairment in a Nondiabetic Adult Population. *Metabolic Syndrome*  
54  
55  
56 370 *and Related Disorders.* 2016;14(2):129-34.  
57  
58  
59  
60



- 1  
2  
3  
4  
5  
6 371 15. Kim MB, Zhang Y, Chang Y, Ryu S, Choi Y, Kwon MJ, et al. Diabetes mellitus and  
7  
8  
9 372 the incidence of hearing loss: a cohort study. *Int J Epidemiol.* 2016.  
10  
11 373 16. Japan Industrial Safety and Health Association (English Page): Ordinance on  
12  
13  
14 374 Industrial Safety and Health, Article 44 Periodical Medical Examination, (iii).  
15  
16  
17 375 [http://www.japaneselawtranslation.go.jp/law/detail\\_main?re=01&ia=03&vm=02&id=1](http://www.japaneselawtranslation.go.jp/law/detail_main?re=01&ia=03&vm=02&id=1)  
18  
19  
20 376 984. Accessed 11 Jan 2018.  
21  
22  
23 377 17. Rigters SC, Metselaar M, Wieringa MH, Baatenburg de Jong RJ, Hofman A,  
24  
25 378 Goedegebure A. Contributing Determinants to Hearing Loss in Elderly Men and  
26  
27  
28 379 Women: Results from the Population-Based Rotterdam Study. *Audiol Neurootol.*  
29  
30  
31 380 2016;21 Suppl 1:10-5.  
32  
33  
34 381 18. Helzner EP, Cauley JA, Pratt SR, Wisniewski SR, Zmuda JM, Talbott EO, et al.  
35  
36  
37 382 Race and sex differences in age-related hearing loss: the Health, Aging and Body  
38  
39  
40 383 Composition Study. *J Am Geriatr Soc.* 2005;53(12):2119-27.  
41  
42  
43 384 19. Ministry of Health, Labour and Welfare (English Page): Specific Health Checkups  
44  
45 385 and Specific Health Guidance. <http://www.mhlw.go.jp/english/wp/wp-hw3/dl/2-007.pdf>.  
46  
47  
48 386 Accessed 11 Jan 2018.  
49  
50  
51 387 20. Ministry of Health, Labour and Welfare (Japanese Page): Health guidance  
52  
53  
54 388 Questionnaire.  
55  
56  
57  
58  
59  
60

- 1  
2  
3  
4  
5  
6 389 [http://www.mhlw.go.jp/seisakunitsuite/bunya/kenkou\\_iryoku/kenkou/seikatsu/dl/hoken-p](http://www.mhlw.go.jp/seisakunitsuite/bunya/kenkou_iryoku/kenkou/seikatsu/dl/hoken-p)  
7  
8  
9 390 rogram2\_02.pdf. Accessed 11 Jan 2018.
- 10  
11 391 21. Kashiwagi A, Kasuga M, Araki E, Oka Y, Hanafusa T, Ito H, et al. International  
12  
13  
14 392 clinical harmonization of glycosylated hemoglobin in Japan: From Japan Diabetes Society  
15  
16  
17 393 to National Glycohemoglobin Standardization Program values. *J Diabetes Investig.*  
18  
19  
20 394 2012;3(1):39-40.
- 21  
22  
23 395 22. Harrell F. *Regression Modeling Strategies: With Applications to Linear Models,*  
24  
25  
26 396 *Logistic and Ordinal Regression, and Survival Analysis*: Springer International  
27  
28  
29 397 Publishing; 2015.
- 30  
31 398 23. Cruickshanks KJ, Nondahl DM, Dalton DS, Fischer ME, Klein BE, Klein R, et al.  
32  
33  
34 399 Smoking, central adiposity, and poor glycemic control increase risk of hearing  
35  
36  
37 400 impairment. *J Am Geriatr Soc.* 2015;63(5):918-24.
- 38  
39  
40 401 24. Carson AP, Fox CS, McGuire DK, Levitan EB, Laclaustra M, Mann DM, et al. Low  
41  
42  
43 402 hemoglobin A1c and risk of all-cause mortality among US adults without diabetes. *Circ*  
44  
45  
46 403 *Cardiovasc Qual Outcomes.* 2010;3(6):661-7.
- 47  
48 404 25. Goto A, Noda M, Matsushita Y, Goto M, Kato M, Isogawa A, et al. Hemoglobin a1c  
49  
50  
51 405 levels and the risk of cardiovascular disease in people without known diabetes: a  
52  
53  
54 406 population-based cohort study in Japan. *Medicine (Baltimore).* 2015;94(17):e785.

- 1  
2  
3  
4  
5  
6 407 26. Snell-Bergeon JK, Wadwa RP. Hypoglycemia, diabetes, and cardiovascular disease.  
7  
8  
9 408 Diabetes Technol Ther. 2012;14 Suppl 1:S51-8.  
10  
11 409 27. Barone JA, Peters JM, Garabrant DH, Bernstein L, Krebsbach R. Smoking as a risk  
12  
13  
14 410 factor in noise-induced hearing loss. J Occup Med. 1987;29(9):741-5.  
15  
16  
17 411 28. Nomura K, Nakao M, Morimoto T. Effect of smoking on hearing loss: quality  
18  
19  
20 412 assessment and meta-analysis. Prev Med. 2005;40(2):138-44.  
21  
22  
23 413 29. Lisowska G, Namyslowski G, Morawski K, Strojek K. Cochlear dysfunction and  
24  
25  
26 414 diabetic microangiopathy. Scand Audiol Suppl. 2001(52):199-203.  
27  
28  
29 415 30. Akinpelu OV, Ibrahim F, Waissbluth S, Daniel SJ. Histopathologic changes in the  
30  
31  
32 416 cochlea associated with diabetes mellitus--a review. Otol Neurotol. 2014;35(5):764-74.  
33  
34 417 31. Krogsboll LT, Jorgensen KJ, Gronhoj Larsen C, Gotzsche PC. General health checks  
35  
36  
37 418 in adults for reducing morbidity and mortality from disease: Cochrane systematic  
38  
39  
40 419 review and meta-analysis. BMJ (Clinical research ed.). 2012;345:e7191.  
41  
42  
43 420 32. Kazmierczak H, Doroszevska G. Metabolic disorders in vertigo, tinnitus, and  
44  
45  
46 421 hearing loss. Int Tinnitus J. 2001;7(1):54-8.  
47  
48  
49 422 33. Nash SD, Cruickshanks KJ, Klein R, Klein BE, Nieto FJ, Huang GH, et al. The  
50  
51  
52 423 prevalence of hearing impairment and associated risk factors: the Beaver Dam  
53  
54 424 Offspring Study. Arch Otolaryngol Head Neck Surg. 2011;137(5):432-9.  
55  
56  
57  
58  
59  
60

- 1  
2  
3  
4  
5  
6 425 34. Uchida Y, Sugiura S, Ando F, Nakashima T, Shimokata H. Diabetes reduces auditory  
7  
8 426 sensitivity in middle-aged listeners more than in elderly listeners: a population- based  
9  
10  
11 427 study of age-related hearing loss. *Med Sci Monit.* 2010;16(7):Ph63-8.  
12  
13  
14 428 35. Konrad-Martin D, Reavis KM, Austin D, Reed N, Gordon J, McDermott D, et al.  
15  
16  
17 429 Hearing Impairment in Relation to Severity of Diabetes in a Veteran Cohort. *Ear Hear.*  
18  
19  
20 430 2015;36(4):381-94.  
21  
22  
23 431 36. Bainbridge KE, Hoffman HJ, Cowie CC. Risk factors for hearing impairment  
24  
25  
26 432 among U.S. adults with diabetes: National Health and Nutrition Examination Survey  
27  
28  
29 433 1999-2004. *Diabetes Care.* 2011;34(7):1540-5.  
30  
31 434 37. Bainbridge KE, Hoffman HJ, Cowie CC. Diabetes and hearing impairment in the  
32  
33  
34 435 United States: audiometric evidence from the National Health and Nutrition  
35  
36  
37 436 Examination Survey, 1999 to 2004. *Ann Intern Med.* 2008;149(1):1-10.  
38  
39  
40 437 38. Kim JS, Lee H. Inner ear dysfunction due to vertebrobasilar ischemic stroke. *Semin*  
41  
42  
43 438 *Neurol.* 2009;29(5):534-40.  
44  
45  
46 439 39. Huang ES, Liu JY, Moffet HH, John PM, Karter AJ. Glycemic control,  
47  
48  
49 440 complications, and death in older diabetic patients: the diabetes and aging study.  
50  
51 441 *Diabetes Care.* 2011;34(6):1329-36.  
52  
53  
54  
55  
56  
57  
58  
59  
60

- 1  
2  
3  
4  
5  
6 442 40. Ostgren CJ, Sundstrom J, Svennblad B, Lohm L, Nilsson PM, Johansson G.  
7  
8 443 Associations of HbA1c and educational level with risk of cardiovascular events in  
9  
10  
11 444 32,871 drug-treated patients with Type 2 diabetes: a cohort study in primary care.  
12  
13  
14 445 Diabet Med. 2013;30(5):e170-7.  
15  
16  
17 446 41. Lie A, Skogstad M, Johannessen HA, Tynes T, Mehlum IS, Nordby KC, et al.  
18  
19  
20 447 Occupational noise exposure and hearing: a systematic review. Int Arch Occup Environ  
21  
22  
23 448 Health. 2016 Apr;89(3):351-72.  
24  
25  
26 449 42. Henderson D, Bielefeld EC, Harris KC, Hu BH. The role of oxidative stress in  
27  
28 450 noise-induced hearing loss. Ear Hear. 2006 Feb;27(1):1-19.  
29  
30  
31 451  
32  
33  
34 452  
35  
36  
37  
38  
39  
40  
41  
42  
43  
44  
45  
46  
47  
48  
49  
50  
51  
52  
53  
54  
55  
56  
57  
58  
59  
60

Table 1 Baseline characteristics of study participants according to HbA<sub>1c</sub> (n=202,975).

|                                            | HbA <sub>1c</sub> (%) (mmol/mol) |               |                    |                    |                    |                    |                    |               |
|--------------------------------------------|----------------------------------|---------------|--------------------|--------------------|--------------------|--------------------|--------------------|---------------|
|                                            | Overall                          | <5.0<br>(<31) | 5.0-5.4<br>(31-36) | 5.5-5.9<br>(37-41) | 6.0-6.4<br>(42-46) | 6.5-6.9<br>(48-52) | 7.0-7.9<br>(53-63) | ≥8<br>(≥64)   |
| <b>Men</b>                                 |                                  |               |                    |                    |                    |                    |                    |               |
| n                                          | 131,689                          | 10,701        | 53,839             | 50,957             | 8,995              | 2,488              | 2,224              | 2,485         |
| Age (years)*                               | 44.6<br>(9.1)                    | 40.9<br>(8.2) | 42.6<br>(8.6)      | 45.7<br>(9.0)      | 49.6<br>(8.6)      | 51.7<br>(7.9)      | 51.6<br>(7.8)      | 49.2<br>(8.2) |
| Walking time, ≥60<br>min/day (%)           | 16                               | 16            | 17                 | 17                 | 15                 | 15                 | 16                 | 13            |
| Smoking status (%)                         |                                  |               |                    |                    |                    |                    |                    |               |
| Non-smoker                                 | 45.15                            | 44            | 44                 | 46                 | 47                 | 50                 | 46                 | 40            |
| Daily consuming<br>≤20 cigarettes/day      | 37.04                            | 39            | 39                 | 36                 | 34                 | 31                 | 32                 | 35            |
| Daily consuming<br>>20 cigarettes/day      | 17.8                             | 17            | 17                 | 18                 | 19                 | 19                 | 22                 | 25            |
| Alcohol<br>consumption (%)                 |                                  |               |                    |                    |                    |                    |                    |               |
| Non-drinker                                | 26                               | 19            | 24                 | 29                 | 31                 | 30                 | 33                 | 36            |
| Drinker <1<br>go/day <sup>†</sup>          | 35                               | 32            | 35                 | 36                 | 34                 | 34                 | 30                 | 32            |
| Drinker 1 to <2<br>go/day <sup>†</sup>     | 26                               | 30            | 27                 | 25                 | 25                 | 25                 | 26                 | 22            |
| Drinker ≥2<br>go/day <sup>†</sup>          | 12                               | 19            | 13                 | 10                 | 10                 | 11                 | 11                 | 10            |
| Self-reported<br>diabetes (%) <sup>‡</sup> | 2.3                              | 0.07          | 0.10               | 0.4                | 4.6                | 22.4               | 41.1               | 37.3          |
| BMI (kg/m <sup>2</sup> )*                  | 23.8<br>(3.5)                    | 22.6<br>(2.9) | 23.2<br>(3.1)      | 24.0<br>(3.5)      | 25.4<br>(4.0)      | 26.0<br>(4.2)      | 26.3<br>(4.3)      | 26.4<br>(4.5) |
| Hypertension (%) <sup>§</sup>              | 28                               | 21            | 22                 | 29                 | 44                 | 57                 | 57                 | 53            |
| Dyslipidemia (%) <sup>  </sup>             | 39                               | 29            | 33                 | 41                 | 54                 | 59                 | 60                 | 65            |
| <b>Women</b>                               |                                  |               |                    |                    |                    |                    |                    |               |
| n                                          | 71,286                           | 5,880         | 28,277             | 29,741             | 5,286              | 890                | 618                | 594           |
| Age (years)*                               | 47.1<br>(9.0)                    | 41.5<br>(7.6) | 44.6<br>(8.6)      | 49.0<br>(8.6)      | 52.6<br>(7.6)      | 53.9<br>(7.2)      | 53.9<br>(7.2)      | 52.0<br>(7.6) |
| Walking time, ≥60<br>min/day (%)           | 12                               | 11            | 11                 | 12                 | 13                 | 12                 | 13                 | 11            |
| Smoking status (%)                         |                                  |               |                    |                    |                    |                    |                    |               |
| Non-smoker                                 | 80                               | 71            | 77                 | 83                 | 86                 | 86                 | 83                 | 77            |
| Daily consuming<br>≤20 cigarettes/day      | 19                               | 26            | 21                 | 16                 | 13                 | 13                 | 16                 | 22            |
| Daily consuming<br>>20 cigarettes/day      | 1.4                              | 2.5           | 1.5                | 1.2                | 1.2                | 1.1                | 1.5                | 1.9           |
| Alcohol<br>consumption (%)                 |                                  |               |                    |                    |                    |                    |                    |               |
| Non-drinker                                | 60                               | 45            | 56                 | 65                 | 70                 | 74                 | 73                 | 78            |
| Drinker <1<br>go/day <sup>†</sup>          | 31                               | 36            | 34                 | 29                 | 26                 | 22                 | 22                 | 19            |
| Drinker 1 to <2<br>go/day <sup>†</sup>     | 6.8                              | 14.4          | 7.8                | 5.0                | 3.8                | 3.9                | 3.7                | 2.7           |
| Drinker ≥2<br>go/day <sup>†</sup>          | 1.7                              | 5.3           | 1.9                | 1.0                | 0.5                | 0.6                | 0.5                | 0.7           |
| Self-reported<br>diabetes (%) <sup>‡</sup> | 1.2                              | 0.05          | 0.03               | 0.1                | 2.5                | 17.4               | 38.2               | 47.5          |
| BMI (kg/m <sup>2</sup> )*                  | 22.3<br>(3.6)                    | 21.2<br>(2.9) | 21.6<br>(3.2)      | 22.5<br>(3.7)      | 23.9<br>(4.3)      | 25.5<br>(4.7)      | 26.4<br>(4.8)      | 26.6<br>(4.6) |
| Hypertension (%) <sup>§</sup>              | 19                               | 11            | 14                 | 21                 | 34                 | 52                 | 59                 | 53            |
| Dyslipidemia (%) <sup>  </sup>             | 22                               | 13            | 16                 | 24                 | 39                 | 54                 | 61                 | 59            |

Longitudinal survey of 202,950 examinees in All Japan Labor Welfare Foundation, Japan, 2008.

\* Mean (SD)

<sup>†</sup> One go contains ~23g of ethanol.

<sup>‡</sup> Self-reported diagnosis of diabetes or receiving medication.

<sup>§</sup> Systolic blood pressure ≥140mmHg, diastolic blood pressure ≥90 mmHg or receiving medication.

<sup>||</sup> Triglyceride level ≥150mg/dL (1.7mmol/L), high-density lipoprotein cholesterol level <40 mg/dL (1.04 mmol/L) in men and <50 mg/dL (1.3 mmol/L) in women or receiving medication.

Table 2 Hazard ratio of hearing impairment according to baseline HbA<sub>1c</sub> (n = 202,975).

|                       |             | HbA <sub>1c</sub> (%) (mmol/mol) |                 |                     |                     |                     |                     |                     | P for quadratic |
|-----------------------|-------------|----------------------------------|-----------------|---------------------|---------------------|---------------------|---------------------|---------------------|-----------------|
|                       |             | <5.0 (<31)                       | 5.0-5.4 (31-36) | 5.5-5.9 (37-41)     | 6.0-6.4 (42-46)     | 6.5-6.9 (48-52)     | 7.0-7.9 (53-63)     | ≥8 (≥64)            |                 |
| <b>Low frequency</b>  |             |                                  |                 |                     |                     |                     |                     |                     |                 |
| Men                   | Person-year | 54,055                           | 275,953         | 261,290             | 44,807              | 11,798              | 10,637              | 11,613              |                 |
|                       | No. cases   | 84                               | 447             | 548                 | 122                 | 45                  | 26                  | 39                  |                 |
|                       | Model 1     | 1.15 (0.91 to 1.45)              | 1.00            | 0.98 (0.86 to 1.11) | 0.94 (0.77 to 1.15) | 1.11 (0.81 to 1.51) | 0.73 (0.49 to 1.08) | 1.22 (0.88 to 1.70) | 0.15            |
|                       | Model 2     | 1.11 (0.88 to 1.40)              | 1.00            | 1.00 (0.88 to 1.14) | 0.98 (0.79 to 1.20) | 1.16 (0.84 to 1.60) | 0.75 (0.49 to 1.15) | 1.26 (0.88 to 1.80) | 0.27            |
| Women                 | Person-year | 28,447                           | 137,761         | 143,295             | 25,083              | 4,136               | 2,760               | 2,576               |                 |
|                       | No. cases   | 65                               | 415             | 553                 | 133                 | 18                  | 14                  | 9                   |                 |
|                       | Model 1     | 1.04 (0.80 to 1.35)              | 1.00            | 0.90 (0.79 to 1.03) | 0.94 (0.77 to 1.14) | 0.71 (0.44 to 1.14) | 0.86 (0.51 to 1.48) | 0.68 (0.35 to 1.31) | 0.79            |
|                       | Model 2     | 1.04 (0.80 to 1.35)              | 1.00            | 0.91 (0.80 to 1.03) | 0.93 (0.76 to 1.14) | 0.67 (0.41 to 1.10) | 0.77 (0.43 to 1.38) | 0.57 (0.28 to 1.19) | 0.51            |
| <b>High frequency</b> |             |                                  |                 |                     |                     |                     |                     |                     |                 |
| Men                   | Person-year | 53,617                           | 273,025         | 257,812             | 44,093              | 11,621              | 10,345              | 11,424              |                 |
|                       | No. cases   | 280                              | 1,610           | 1,941               | 416                 | 116                 | 128                 | 130                 |                 |
|                       | Model 1     | 1.05 (0.92 to 1.19)              | 1.00            | 0.98 (0.91 to 1.04) | 0.91 (0.82 to 1.02) | 0.82 (0.67 to 0.99) | 1.05 (0.88 to 1.26) | 1.15 (0.96 to 1.38) | 0.003           |
|                       | Model 2     | 1.03 (0.90 to 1.17)              | 1.00            | 0.99 (0.92 to 1.06) | 0.93 (0.83 to 1.03) | 0.84 (0.69 to 1.02) | 1.08 (0.89 to 1.32) | 1.18 (0.97 to 1.43) | 0.007           |
| Women                 | Person-year | 28,520                           | 138,232         | 143,882             | 25,246              | 4,124               | 2,753               | 2,555               |                 |
|                       | No. cases   | 23                               | 169             | 277                 | 67                  | 18                  | 13                  | 15                  |                 |
|                       | Model 1     | 1.02 (0.66 to 1.58)              | 1.00            | 1.00 (0.83 to 1.22) | 0.97 (0.73 to 1.29) | 1.43 (0.88 to 2.34) | 1.62 (0.92 to 2.86) | 2.41 (1.42 to 4.10) | 0.03            |
|                       | Model 2     | 1.03 (0.66 to 1.60)              | 1.00            | 0.97 (0.80 to 1.17) | 0.86 (0.64 to 1.16) | 1.17 (0.70 to 1.95) | 1.24 (0.67 to 2.29) | 1.78 (0.95 to 3.34) | 0.08            |

Model 1: Adjusted for age.

Model 2: Adjusted for age, walking time, smoking status, alcohol consumption, self-reported diabetes, BMI, hypertension and hyperlipidemia.

453

1  
2  
3  
4  
5 454 **Fig1.** The association between HbA1c and hearing impairment of high frequency stratified by smoking status.  
6 455 Footnote; Results obtained by multivariable Cox regression. The reference value was 5.0-5.4% of HbA1c in  
7 456 non-smoker. The model was adjusted for age (year, continuous), sex, body mass index (<18.5, 18.5-22.9, 23-29.9, or  
8 457  $\geq 30.0$  kg/m<sup>2</sup>), alcohol consumption (non-drinker, drinker consuming <1, 1 to <2, or  $\geq 2$  go of Japanese sake  
9 458 contains approximately 23g of ethanol), walking time (<60, or  $\geq 60$  min/day), self-reported diabetes, hypertension  
10 459 (systolic blood pressure  $\geq 140$ mmHg, diastolic blood pressure  $\geq 90$  mmHg or receiving medication), and  
11 460 hyperlipidemia (triglyceride level  $\geq 150$ mg/dL, high-density lipoprotein cholesterol level <40 mg/dL or receiving  
12 461 medication).

For peer review only



1  
2  
3  
4  
5 **Fig 2.** Adjusted hazard ratio of high frequency hearing impairment among participants with diabetes at baseline  
6 (n=10,154).  
7

8 Footnote; Results obtained by multivariable Cox regression with restricted cubic splines with seven knots (p1, p5,  
9 p25, p50, p75, p95 and p99). The reference value was 6.6% (p25) of HbA1c. The continuous line presents hazard  
10 ratios and the dashed line presents 95% confidence intervals. The model was adjusted for age (year, continuous), sex,  
11 body mass index (<18.5, 18.5-22.9, 23-29.9, or  $\geq 30.0$  kg/m<sup>2</sup>), smoking status (non-smoker, smoker consuming  $\leq 20$ ,  
12 or  $> 20$  cigarettes per day), alcohol consumption (non-drinker, drinker consuming  $<1$ ,  $1$  to  $< 2$ , or  $\geq 2$  go of Japanese  
13 sake contains approximately 23g of ethanol), walking time (  $<60$ , or  $\geq 60$  min/day), hypertension (systolic blood  
14 pressure  $\geq 140$ mmHg, diastolic blood pressure  $\geq 90$  mmHg or receiving medication), and hyperlipidemia (triglyceride  
15 level  $\geq 150$ mg/dL, high-density lipoprotein cholesterol level  $<40$  mg/dL in men and  $<50$  mg/dL in women or  
16 receiving medication).  
17  
18  
19  
20

21 462  
22  
23  
24  
25  
26  
27  
28  
29  
30  
31  
32  
33  
34  
35  
36  
37  
38  
39  
40  
41  
42  
43  
44  
45  
46  
47  
48  
49  
50  
51  
52  
53  
54  
55  
56  
57  
58  
59  
60

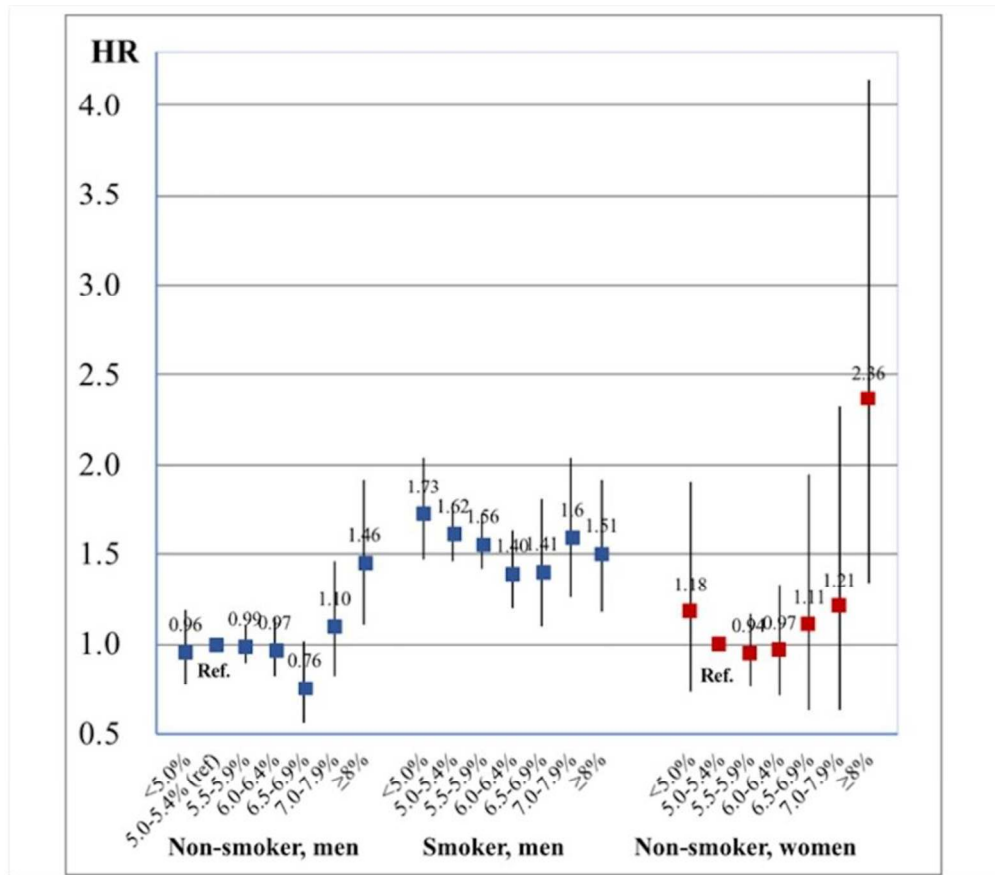

Fig1. The association between HbA1c and hearing impairment of high frequency stratified by smoking status.

Footnote; Results obtained by multivariable Cox regression. The reference value was 5.0-5.4% of HbA1c in non-smoker. The model was adjusted for age (year, continuous), sex, body mass index (<18.5, 18.5-22.9, 23-29.9, or ≥ 30.0 kg/m<sup>2</sup>), alcohol consumption (non-drinker, drinker consuming <1, 1 to < 2, or ≥ 2 go of Japanese sake contains approximately 23g of ethanol), walking time (<60, or ≥60 min/day), self-reported diabetes, hypertension (systolic blood pressure ≥140mmHg, diastolic blood pressure ≥90 mmHg or receiving medication), and hyperlipidemia (triglyceride level ≥150mg/dL, high-density lipoprotein cholesterol level <40 mg/dL or receiving medication).

84x73mm (300 x 300 DPI)

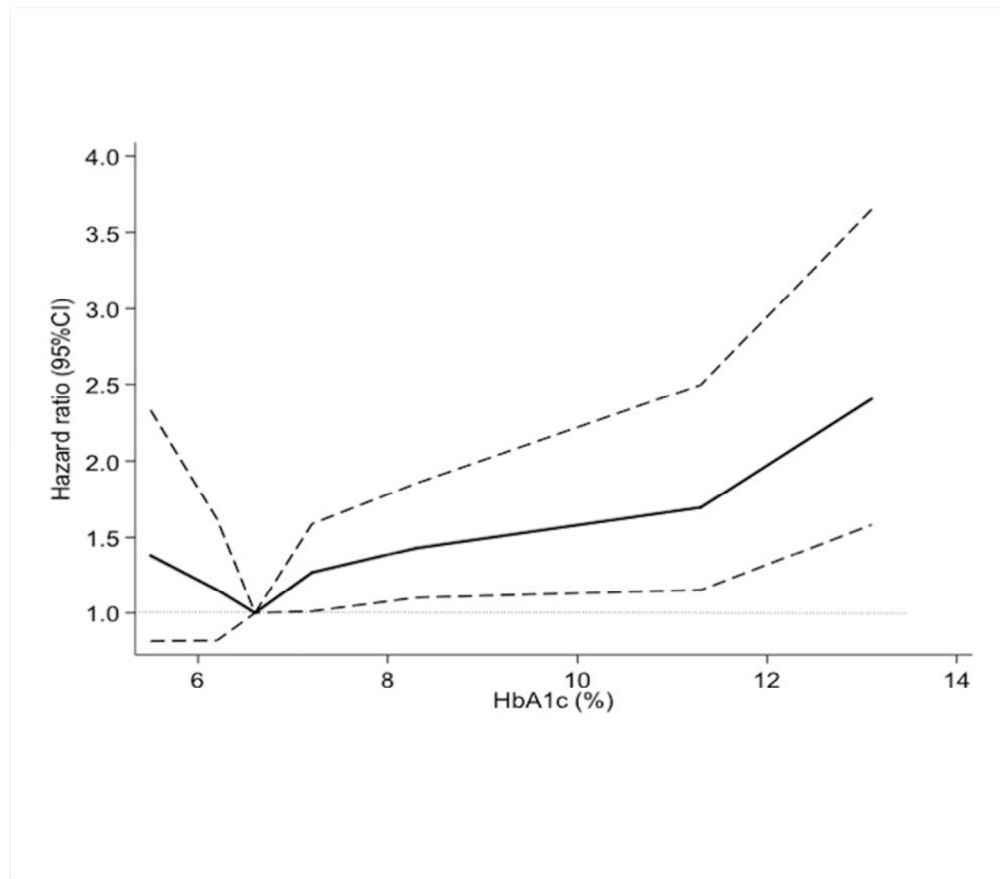

Fig 2. Adjusted hazard ratio of high frequency hearing impairment among participants with diabetes at baseline (n=10,154).

Footnote; Results obtained by multivariable Cox regression with restricted cubic splines with seven knots (p1, p5, p25, p50, p75, p95 and p99). The reference value was 6.6% (p25) of HbA1c. The continuous line presents hazard ratios and the dashed line presents 95% confidence intervals. The model was adjusted for age (year, continuous), sex, body mass index (<18.5, 18.5-22.9, 23-29.9, or  $\geq 30.0$  kg/m<sup>2</sup>), smoking status (non-smoker, smoker consuming  $\leq 20$ , or  $> 20$  cigarettes per day), alcohol consumption (non-drinker, drinker consuming  $<1$ , 1 to  $< 2$ , or  $\geq 2$  go of Japanese sake contains approximately 23g of ethanol), walking time (  $<60$ , or  $\geq 60$  min/day), hypertension (systolic blood pressure  $\geq 140$ mmHg, diastolic blood pressure  $\geq 90$  mmHg or receiving medication), and hyperlipidemia (triglyceride level  $\geq 150$ mg/dL, high-density lipoprotein cholesterol level  $<40$  mg/dL in men and  $<50$  mg/dL in women or receiving medication).

84x73mm (300 x 300 DPI)

Appendix 1. The association between baseline HbA<sub>1c</sub> and Incidence of high frequency hearing impairment (n=126,823).

|              |             | HbA <sub>1c</sub> (%) (mmol/mol) |                 |                     |                     |                     |                     |                     | P for quadratic |
|--------------|-------------|----------------------------------|-----------------|---------------------|---------------------|---------------------|---------------------|---------------------|-----------------|
|              |             | <5.0 (<31)                       | 5.0-5.4 (31-36) | 5.5-5.9 (37-41)     | 6.0-6.4 (42-46)     | 6.5-6.9 (48-52)     | 7.0-7.9 (53-63)     | ≥8 (≥64)            |                 |
| <b>Men</b>   | Person-year | 44,265                           | 227,740         | 215,647             | 36,368              | 9,184               | 8,148               | 8,888               |                 |
|              | No.cases    | 229                              | 1,345           | 1,535               | 329                 | 91                  | 99                  | 100                 |                 |
|              | non-smoker  | 0.94 (0.73 to 1.20)              | 1.00            | 0.93 (0.82 to 1.05) | 0.89 (0.73 to 1.07) | 0.68 (0.48 to 0.96) | 1.10 (0.80 to 1.53) | 1.37 (1.00 to 1.88) | 0.01            |
|              | smoker      | 1.06 (0.89 to 1.26)              | 1.00            | 0.95 (0.86 to 1.05) | 0.91 (0.77 to 1.07) | 1.00 (0.76 to 1.31) | 1.10 (0.84 to 1.44) | 1.04 (0.79 to 1.37) | 0.23            |
| <b>Women</b> | Person-year | 22,749                           | 110,979         | 114,327             | 19,601              | 3,143               | 2,062               | 1,813               |                 |
|              | No.cases    | 19                               | 140             | 214                 | 48                  | 15                  | 11                  | 13                  |                 |
|              | non-smoker  | 1.11 (0.65 to 1.91)              | 1.00            | 0.92 (0.72 to 1.18) | 0.88 (0.61 to 1.26) | 1.28 (0.69 to 2.35) | 1.47 (0.73 to 2.94) | 2.83 (1.53 to 5.24) | 0.005           |

Adjusted for age, walking time, alcohol consumption, self-reported diabetes, BMI, hypertension, hyperlipidemia and job type.

1

## STROBE Statement—checklist of items that should be included in reports of observational studies

|                           | Item No | Recommendation                                                                                                                                                                                                                                                                                                                                                                                                                                                                                                                                                                                                                                                                                   | Page number                            |
|---------------------------|---------|--------------------------------------------------------------------------------------------------------------------------------------------------------------------------------------------------------------------------------------------------------------------------------------------------------------------------------------------------------------------------------------------------------------------------------------------------------------------------------------------------------------------------------------------------------------------------------------------------------------------------------------------------------------------------------------------------|----------------------------------------|
| <b>Title and abstract</b> | 1       | (a) Indicate the study's design with a commonly used term in the title or the abstract<br>(b) Provide in the abstract an informative and balanced summary of what was done and what was found                                                                                                                                                                                                                                                                                                                                                                                                                                                                                                    | P1<br>Line1<br>P3 Line31,<br>P4 Line51 |
| <b>Introduction</b>       |         |                                                                                                                                                                                                                                                                                                                                                                                                                                                                                                                                                                                                                                                                                                  |                                        |
| Background/rationale      | 2       | Explain the scientific background and rationale for the investigation being reported                                                                                                                                                                                                                                                                                                                                                                                                                                                                                                                                                                                                             | P5 Line64-79                           |
| Objectives                | 3       | State specific objectives, including any prespecified hypotheses                                                                                                                                                                                                                                                                                                                                                                                                                                                                                                                                                                                                                                 | P6 Line83-88                           |
| <b>Methods</b>            |         |                                                                                                                                                                                                                                                                                                                                                                                                                                                                                                                                                                                                                                                                                                  |                                        |
| Study design              | 4       | Present key elements of study design early in the paper                                                                                                                                                                                                                                                                                                                                                                                                                                                                                                                                                                                                                                          | P7 Line90                              |
| Setting                   | 5       | Describe the setting, locations, and relevant dates, including periods of recruitment, exposure, follow-up, and data collection                                                                                                                                                                                                                                                                                                                                                                                                                                                                                                                                                                  | P7 Line90-107                          |
| Participants              | 6       | (a) <i>Cohort study</i> —Give the eligibility criteria, and the sources and methods of selection of participants. Describe methods of follow-up<br><i>Case-control study</i> —Give the eligibility criteria, and the sources and methods of case ascertainment and control selection. Give the rationale for the choice of cases and controls<br><i>Cross-sectional study</i> —Give the eligibility criteria, and the sources and methods of selection of participants<br>(b) <i>Cohort study</i> —For matched studies, give matching criteria and number of exposed and unexposed<br><i>Case-control study</i> —For matched studies, give matching criteria and the number of controls per case | P7 Line99-108                          |
| Variables                 | 7       | Clearly define all outcomes, exposures, predictors, potential confounders, and effect modifiers. Give diagnostic criteria, if applicable                                                                                                                                                                                                                                                                                                                                                                                                                                                                                                                                                         | P8<br>Line118-155                      |
| Data sources/measurement  | 8*      | For each variable of interest, give sources of data and details of methods of assessment (measurement). Describe comparability of assessment methods if there is more than one group                                                                                                                                                                                                                                                                                                                                                                                                                                                                                                             | P9<br>Line143-153                      |
| Bias                      | 9       | Describe any efforts to address potential sources of bias                                                                                                                                                                                                                                                                                                                                                                                                                                                                                                                                                                                                                                        | P15<br>Line271-278,<br>Line282         |
| Study size                | 10      | Explain how the study size was arrived at                                                                                                                                                                                                                                                                                                                                                                                                                                                                                                                                                                                                                                                        |                                        |
| Quantitative variables    | 11      | Explain how quantitative variables were handled in the analyses. If applicable, describe which groupings were chosen and why                                                                                                                                                                                                                                                                                                                                                                                                                                                                                                                                                                     | P9<br>Line127-143                      |
| Statistical methods       | 12      | (a) Describe all statistical methods, including those used to control for confounding<br>(b) Describe any methods used to examine subgroups and interactions                                                                                                                                                                                                                                                                                                                                                                                                                                                                                                                                     | P10<br>Line157-193<br>P11<br>Line173-  |

1  
2  
3  
4  
5  
6  
7  
8  
9  
10  
11  
12  
13  
14  
15  
16  
17  
18  
19  
20  
21  
22  
23  
24  
25  
26  
27  
28  
29  
30  
31  
32  
33  
34  
35  
36  
37  
38  
39  
40  
41  
42  
43  
44  
45  
46  
47  
48  
49  
50  
51  
52  
53  
54  
55  
56  
57  
58  
59  
60

184

---

(c) Explain how missing data were addressed

P7

Line105-

107

---

(d) *Cohort study*—If applicable, explain how loss to follow-up was addressed

*Case-control study*—If applicable, explain how matching of cases and controls was addressed

*Cross-sectional study*—If applicable, describe analytical methods taking account of sampling strategy

---

(e) Describe any sensitivity analyses

P12

Line185-

187

Continued on next page

1  
2  
3  
4  
5  
6  
7  
8  
9  
10  
11  
12  
13  
14  
15  
16  
17  
18  
19  
20  
21  
22  
23  
24  
25  
26  
27  
28  
29  
30  
31  
32  
33  
34  
35  
36  
37  
38  
39  
40  
41  
42  
43  
44  
45  
46  
47  
48  
49  
50  
51  
52  
53  
54  
55  
56  
57  
58  
59  
60

| <b>Results</b>    |     |                                                                                                                                                                                                              |                               |
|-------------------|-----|--------------------------------------------------------------------------------------------------------------------------------------------------------------------------------------------------------------|-------------------------------|
| Participants      | 13* | (a) Report numbers of individuals at each stage of study—eg numbers potentially eligible, examined for eligibility, confirmed eligible, included in the study, completing follow-up, and analysed            | Table1,2,<br>Fig2             |
|                   |     | (b) Give reasons for non-participation at each stage                                                                                                                                                         | P11<br>Line178                |
|                   |     | (c) Consider use of a flow diagram                                                                                                                                                                           |                               |
| Descriptive data  | 14* | (a) Give characteristics of study participants (eg demographic, clinical, social) and information on exposures and potential confounders                                                                     | P12<br>Line196-200,<br>Table1 |
|                   |     | (b) Indicate number of participants with missing data for each variable of interest                                                                                                                          | P7<br>Line1001-109            |
|                   |     | (c) <i>Cohort study</i> —Summarise follow-up time (eg, average and total amount)                                                                                                                             | P12<br>Line201-206            |
| Outcome data      | 15* | <i>Cohort study</i> —Report numbers of outcome events or summary measures over time                                                                                                                          | P12<br>Line200-206            |
|                   |     | <i>Case-control study</i> —Report numbers in each exposure category, or summary measures of exposure                                                                                                         |                               |
|                   |     | <i>Cross-sectional study</i> —Report numbers of outcome events or summary measures                                                                                                                           |                               |
| Main results      | 16  | (a) Give unadjusted estimates and, if applicable, confounder-adjusted estimates and their precision (eg, 95% confidence interval). Make clear which confounders were adjusted for and why they were included | P13<br>Line215                |
|                   |     | (b) Report category boundaries when continuous variables were categorized                                                                                                                                    | P10<br>Line158-161            |
|                   |     | (c) If relevant, consider translating estimates of relative risk into absolute risk for a meaningful time period                                                                                             |                               |
| Other analyses    | 17  | Report other analyses done—eg analyses of subgroups and interactions, and sensitivity analyses                                                                                                               | P14<br>Line218-223            |
| <b>Discussion</b> |     |                                                                                                                                                                                                              |                               |
| Key results       | 18  | Summarise key results with reference to study objectives                                                                                                                                                     | P14<br>Line225-231            |
| Limitations       | 19  | Discuss limitations of the study, taking into account sources of potential bias or imprecision. Discuss both direction and magnitude of any potential bias                                                   | P17<br>Line271-284            |
| Interpretation    | 20  | Give a cautious overall interpretation of results considering objectives, limitations, multiplicity of analyses, results from similar studies, and other relevant evidence                                   | P17<br>Line285-290            |
| Generalisability  | 21  | Discuss the generalisability (external validity) of the study results                                                                                                                                        | P17<br>Line284-               |

---

**Other information**


---

|         |    |                                                                                                                                                               |                |
|---------|----|---------------------------------------------------------------------------------------------------------------------------------------------------------------|----------------|
| Funding | 22 | Give the source of funding and the role of the funders for the present study and, if applicable, for the original study on which the present article is based | P18<br>Line301 |
|---------|----|---------------------------------------------------------------------------------------------------------------------------------------------------------------|----------------|

\*Give information separately for cases and controls in case-control studies and, if applicable, for exposed and unexposed groups in cohort and cross-sectional studies.

**Note:** An Explanation and Elaboration article discusses each checklist item and gives methodological background and published examples of transparent reporting. The STROBE checklist is best used in conjunction with this article (freely available on the Web sites of PLoS Medicine at <http://www.plosmedicine.org/>, Annals of Internal Medicine at <http://www.annals.org/>, and Epidemiology at <http://www.epidem.com/>). Information on the STROBE Initiative is available at [www.strobe-statement.org](http://www.strobe-statement.org).
