# Supplementary material for: Haemoglobin A1c and hearing impairment: longitudinal analysis using a large occupational health check-up data of Japan
Source: PubMed Central journal article supplement — BMJ Open. 2018 Sep 17;8(9):e023220. doi: 10.1136/bmjopen-2018-023220 (PMC6144394; doi:10.1136/bmjopen-2018-023220), 2018-09-17
Supplement: bmjopen-2018-023220supp001.pdf [file bmjopen-2018-023220supp001.pdf]

**Appendix 1. The association between baseline HbA<sub>1c</sub> and Incidence of high frequency hearing impairment (n=126,823).**

|              |             | HbA <sub>1c</sub> (%) (mmol/mol) |                 |                     |                     |                     |                     |                     | P for quadratic |
|--------------|-------------|----------------------------------|-----------------|---------------------|---------------------|---------------------|---------------------|---------------------|-----------------|
|              |             | <5.0 (<31)                       | 5.0-5.4 (31-36) | 5.5-5.9 (37-41)     | 6.0-6.4 (42-46)     | 6.5-6.9 (48-52)     | 7.0-7.9 (53-63)     | ≥8 (≥64)            |                 |
| <b>Men</b>   | Person-year | 44,265                           | 227,740         | 215,647             | 36,368              | 9,184               | 8,148               | 8,888               |                 |
|              | No.cases    | 229                              | 1,345           | 1,535               | 329                 | 91                  | 99                  | 100                 |                 |
|              | non-smoker  | 0.94 (0.73 to 1.20)              | 1.00            | 0.93 (0.82 to 1.05) | 0.89 (0.73 to 1.07) | 0.68 (0.48 to 0.96) | 1.10 (0.80 to 1.53) | 1.37 (1.00 to 1.88) | 0.01            |
|              | smoker      | 1.06 (0.89 to 1.26)              | 1.00            | 0.95 (0.86 to 1.05) | 0.91 (0.77 to 1.07) | 1.00 (0.76 to 1.31) | 1.10 (0.84 to 1.44) | 1.04 (0.79 to 1.37) | 0.23            |
| <b>Women</b> | Person-year | 22,749                           | 110,979         | 114,327             | 19,601              | 3,143               | 2,062               | 1,813               |                 |
|              | No.cases    | 19                               | 140             | 214                 | 48                  | 15                  | 11                  | 13                  |                 |
|              | non-smoker  | 1.11 (0.65 to 1.91)              | 1.00            | 0.92 (0.72 to 1.18) | 0.88 (0.61 to 1.26) | 1.28 (0.69 to 2.35) | 1.47 (0.73 to 2.94) | 2.83 (1.53 to 5.24) | 0.005           |

Adjusted for age, walking time, alcohol consumption, self-reported diabetes, BMI, hypertension, hyperlipidemia and job type.
